# Supplementary material for: Single-cell transcriptome reveals the novel role of T-bet in suppressing the immature NK gene signature
Source: eLife journal article supplement (doi:10.7554/elife.51339), 2020-05-14
Supplement: supp [file elife-51339-supp-v1.zip]

Archive with 13 entries (13 files):
- elife_poa_e51339_Figure_1_figure_supplement_1.pdf
- elife_poa_e51339_Figure_1_figure_supplement_2.pdf
- elife_poa_e51339_Figure_3_figure_supplement_1.pdf
- elife_poa_e51339_Figure_4_figure_supplement_1.pdf
- elife_poa_e51339_Figure_5_figure_supplement_1.pdf
- elife_poa_e51339_Figure_5_figure_supplement_2.pdf
- elife_poa_e51339_Figure_6_figure_supplement_1.pdf
- elife_poa_e51339_Figure_7_figure_supplement_1.pdf
- elife_poa_e51339_Supplementary_file_1.xlsx
- elife_poa_e51339_Supplementary_file_2.xlsx
- elife_poa_e51339_Supplementary_file_3.xlsx
- elife_poa_e51339_Supplementary_file_4.xlsx
- elife_poa_e51339_Transparent_Reporting_File.pdf
