# Supplementary material for: Single-cell transcriptome reveals the novel role of T-bet in suppressing the immature NK gene signature
Source: eLife journal article supplement (doi:10.7554/elife.51339), 2020-05-14
Supplement: supp [file elife-51339-supp-v1.zip › elife_poa_e51339_Figure_4_figure_supplement_1.pdf]

| Statistic                 | Machine learning classifiers |                       |                 |                    |                    |
|---------------------------|------------------------------|-----------------------|-----------------|--------------------|--------------------|
|                           | Generalized Linear (GL)      | Gradient Boosted (GB) | XGB Boost (XGB) | Random Forest (RF) | Deep Learning (DL) |
| Test accuracy             | 0.700                        | 0.660                 | 0.610           | 0.600              | 0.690              |
| Cross validation accuracy | 0.630                        | 0.630                 | 0.590           | 0.550              | 0.660              |
| Mean standard error       | 0.320                        | 0.310                 | 0.340           | 0.440              | 0.310              |
| Mean per class error      | 0.400                        | 0.410                 | 0.440           | 0.520              | 0.370              |
