# Supplementary material for: Single-cell transcriptome reveals the novel role of T-bet in suppressing the immature NK gene signature
Source: eLife journal article supplement (doi:10.7554/elife.51339), 2020-05-14
Supplement: supp [file elife-51339-supp-v1.zip › elife_poa_e51339_Supplementary_file_1.xlsx]

## Sheet: WT_NKpure_PCA_markers
Supplementary File 1. DEGs of five WT NK clusters (logfc > 0.25; p_val_adj < 0.05). Related to Figure 1 and 2.
	p_val	avg_logFC	pct.1	pct.2	p_val_adj	cluster	gene
Ltb	2.25879e-80	0.715955	0.727	0.363	6.32189e-76	1	Ltb
Klra4	3.13461e-69	-1.00478	0.325	0.639	8.77316e-65	1	Klra4
Gzma	2.15481e-67	-0.708513	0.868	0.97	6.03088e-63	1	Gzma
Ccl3	4.09748e-50	-0.95719	0.387	0.644	1.1468e-45	1	Ccl3
Thy1	1.05502e-46	0.528266	0.655	0.362	2.9528e-42	1	Thy1
Klrc1	5.05991e-36	0.492675	0.617	0.358	1.41617e-31	1	Klrc1
Ly6e	8.9956e-36	0.412748	0.849	0.673	2.51769e-31	1	Ly6e
Ccl4	6.34304e-34	-0.874611	0.508	0.694	1.77529e-29	1	Ccl4
Cd3g	3.99607e-32	0.518541	0.216	0.056	1.11842e-27	1	Cd3g
Cd3d	8.92201e-31	0.561777	0.223	0.078	2.49709e-26	1	Cd3d
Irf8	1.24808e-29	-0.558842	0.44	0.624	3.49312e-25	1	Irf8
Socs2	9.6267e-28	0.462025	0.152	0.036	2.69432e-23	1	Socs2
Cd7	1.04845e-26	0.380971	0.807	0.644	2.9344e-22	1	Cd7
Borcs7	1.09235e-25	-0.472787	0.135	0.325	3.05728e-21	1	Borcs7
Klra8	3.18265e-25	-0.59798	0.423	0.609	8.9076e-21	1	Klra8
Lgals1	9.28715e-24	-0.338279	0.907	0.96	2.59929e-19	1	Lgals1
Serpina3g	1.66048e-23	0.384651	0.581	0.381	4.64736e-19	1	Serpina3g
Plek	1.79647e-20	-0.41436	0.284	0.452	5.02796e-16	1	Plek
Cma1	3.22523e-17	-0.47971	0.085	0.213	9.02677e-13	1	Cma1
Zeb2	5.79695e-16	-0.402095	0.123	0.26	1.62245e-11	1	Zeb2
Emb	1.88096e-15	0.316041	0.461	0.305	5.26442e-11	1	Emb
Gzmb	9.24652e-15	-0.504874	0.292	0.425	2.58792e-10	1	Gzmb
Vim	2.75661e-14	-0.326666	0.667	0.734	7.71519e-10	1	Vim
As3mt	4.86645e-14	-0.324002	0.095	0.214	1.36202e-09	1	As3mt
S100a6	2.52e-13	0.338402	0.628	0.486	7.05296e-09	1	S100a6
Serpinb6b	4.23457e-13	-0.333962	0.373	0.504	1.18517e-08	1	Serpinb6b
Cxcr3	5.65056e-12	0.257837	0.211	0.108	1.58148e-07	1	Cxcr3
Nr4a1	7.10447e-11	-0.289167	0.103	0.2	1.9884e-06	1	Nr4a1
Cd28	1.18574e-10	0.301145	0.379	0.258	3.31865e-06	1	Cd28
Tnfrsf18	7.56559e-10	0.254515	0.433	0.321	2.11746e-05	1	Tnfrsf18
Nfkbia	1.50095e-08	-0.282239	0.552	0.64	0.000420087	1	Nfkbia
Klra9	2.76015e-08	-0.314068	0.312	0.42	0.000772511	1	Klra9
Klrg1	3.42845e-08	-0.297518	0.048	0.108	0.000959556	1	Klrg1
Khdc1a	7.03423e-07	-0.272576	0.12	0.198	0.0196874	1	Khdc1a
Ifng	1.18325e-06	-0.304112	0.331	0.418	0.0331168	1	Ifng
Nme1	1.09303e-61	0.648397	0.778	0.509	3.05917e-57	2	Nme1
Eif5a	3.16091e-50	0.48741	0.917	0.806	8.84674e-46	2	Eif5a
Mif	2.2839e-35	0.495343	0.682	0.455	6.39217e-31	2	Mif
Ranbp1	1.99257e-33	0.506289	0.608	0.359	5.57679e-29	2	Ranbp1
Ypel3	6.50581e-30	-0.481139	0.448	0.68	1.82085e-25	2	Ypel3
Srm	7.09073e-30	0.321758	0.197	0.04	1.98455e-25	2	Srm
Nop10	1.0405e-29	0.438641	0.707	0.526	2.91216e-25	2	Nop10
Vim.1	1.40378e-26	-0.478752	0.6	0.744	3.92891e-22	2	Vim
Hsp90ab1	2.06654e-23	0.317077	0.888	0.801	5.78383e-19	2	Hsp90ab1
Fbl	4.50109e-23	0.380623	0.541	0.312	1.25976e-18	2	Fbl
Cd7.1	1.08622e-21	-0.416369	0.55	0.717	3.0401e-17	2	Cd7
Ran	5.14618e-21	0.354063	0.72	0.59	1.44031e-16	2	Ran
Nhp2	2.44464e-19	0.395902	0.459	0.283	6.84205e-15	2	Nhp2
Mettl1	4.3538e-19	0.283043	0.156	0.039	1.21854e-14	2	Mettl1
Klrd1	6.73009e-19	-0.274677	0.881	0.925	1.88362e-14	2	Klrd1
Ppp1r14b	2.24e-18	0.306744	0.226	0.083	6.26932e-14	2	Ppp1r14b
C1qbp	9.26334e-18	0.354485	0.369	0.197	2.59262e-13	2	C1qbp
Hspe1	6.8694e-17	0.330217	0.678	0.547	1.92261e-12	2	Hspe1
Mybbp1a	1.12591e-16	0.278877	0.188	0.064	3.15119e-12	2	Mybbp1a
Rps27l	1.42138e-16	0.304342	0.7	0.552	3.97815e-12	2	Rps27l
Serbp1	3.00395e-16	0.255917	0.852	0.775	8.40744e-12	2	Serbp1
Ccl5	3.15845e-15	-0.281516	0.998	0.999	8.83988e-11	2	Ccl5
Gar1	3.65661e-14	0.304625	0.3	0.153	1.02341e-09	2	Gar1
Npm1	4.65156e-14	0.250274	0.902	0.842	1.30188e-09	2	Npm1
Mrpl23	8.38321e-14	0.287335	0.541	0.364	2.34629e-09	2	Mrpl23
Ddx21	9.93638e-13	0.310226	0.477	0.329	2.781e-08	2	Ddx21
Atp5g1	1.17513e-12	0.25271	0.698	0.564	3.28896e-08	2	Atp5g1
Gzma.1	2.62613e-11	-0.374846	0.948	0.943	7.35e-07	2	Gzma
H2afv	8.40864e-11	-0.280432	0.448	0.559	2.35341e-06	2	H2afv
Npm3	1.46296e-10	0.269068	0.515	0.368	4.09452e-06	2	Npm3
Bola2	1.76181e-10	0.27475	0.542	0.405	4.93094e-06	2	Bola2
Cycs	2.14504e-10	0.262286	0.606	0.461	6.00354e-06	2	Cycs
Gnl3	3.0422e-10	0.250548	0.237	0.121	8.51451e-06	2	Gnl3
Cct3	3.72364e-10	0.259344	0.297	0.171	1.04217e-05	2	Cct3
Dusp1	6.71909e-10	-0.305	0.333	0.447	1.88054e-05	2	Dusp1
Qrfp	1.22508e-09	-0.292495	0.128	0.241	3.42874e-05	2	Qrfp
Uqcc2	1.41233e-09	0.263763	0.476	0.347	3.95282e-05	2	Uqcc2
Set	1.76165e-09	0.256838	0.532	0.401	4.93051e-05	2	Set
Gm26740	4.74136e-09	-0.286559	0.11	0.214	0.000132701	2	Gm26740
Tnfrsf9	1.06141e-08	0.289552	0.201	0.12	0.000297066	2	Tnfrsf9
Klra8.1	2.12474e-08	-0.26122	0.573	0.558	0.000594671	2	Klra8
Serpinb6b.1	2.47059e-08	-0.257068	0.41	0.484	0.000691469	2	Serpinb6b
S100a6.1	5.19428e-08	-0.308798	0.432	0.544	0.00145377	2	S100a6
Tuba1b	1.0251e-07	0.272969	0.387	0.277	0.00286906	2	Tuba1b
Klrc1.1	1.04692e-07	-0.293298	0.331	0.447	0.00293013	2	Klrc1
Tsc22d3	3.5481e-07	-0.264714	0.09	0.172	0.00993044	2	Tsc22d3
Cma1.1	1.1477e-06	-0.333822	0.114	0.196	0.0321218	2	Cma1
Klra4.1	1.51552e-54	0.675225	0.743	0.49	4.24164e-50	3	Klra4
Nme1.1	1.18145e-24	-0.438416	0.452	0.6	3.30664e-20	3	Nme1
Klra8.2	2.42711e-24	0.481347	0.665	0.523	6.79299e-20	3	Klra8
Thy1.1	5.03299e-24	-0.453829	0.293	0.49	1.40863e-19	3	Thy1
S100a6.2	9.9709e-23	-0.551432	0.396	0.569	2.79066e-18	3	S100a6
Ypel3.1	1.40821e-18	0.306221	0.749	0.595	3.94129e-14	3	Ypel3
Ranbp1.1	1.90361e-18	-0.372524	0.286	0.45	5.32781e-14	3	Ranbp1
Id2	8.17843e-16	-0.264725	0.819	0.896	2.28898e-11	3	Id2
Eif5a.1	1.97713e-14	-0.270487	0.778	0.845	5.53359e-10	3	Eif5a
Ly6e.1	2.27934e-14	-0.282747	0.657	0.741	6.37941e-10	3	Ly6e
Ccnd2	1.23145e-13	-0.30167	0.512	0.64	3.44659e-09	3	Ccnd2
Nop10.1	1.09042e-12	-0.272001	0.471	0.593	3.05186e-08	3	Nop10
Actb	1.88028e-11	-0.265825	1	0.999	5.26253e-07	3	Actb
Klrc1.2	1.45818e-10	-0.318849	0.33	0.46	4.08116e-06	3	Klrc1
Klrg1.1	4.15239e-10	-0.314262	0.041	0.112	1.16217e-05	3	Klrg1
Mif.1	5.54984e-10	-0.251192	0.437	0.52	1.55329e-05	3	Mif
Tnfrsf9.1	1.1899e-09	-0.257863	0.076	0.157	3.3303e-05	3	Tnfrsf9
Gzmb.1	1.7814e-08	-0.371506	0.344	0.408	0.000498578	3	Gzmb
Cd3d.1	3.38183e-08	-0.281829	0.072	0.131	0.000946507	3	Cd3d
Cd3g.1	7.14462e-08	-0.29085	0.055	0.113	0.00199964	3	Cd3g
Xcl1	1.27796e-07	-0.306785	0.67	0.722	0.00357675	3	Xcl1
Nfkbia.1	1.6533e-47	0.746169	0.847	0.588	4.62726e-43	4	Nfkbia
Ccl4.2	5.7842e-33	0.90963	0.802	0.625	1.61888e-28	4	Ccl4
Junb	6.39451e-26	0.403137	0.994	0.945	1.78969e-21	4	Junb
Pim1	1.31388e-25	0.54559	0.838	0.661	3.67728e-21	4	Pim1
Irf8.1	7.25775e-25	0.540007	0.763	0.552	2.0313e-20	4	Irf8
Nfkbiz	1.89021e-22	0.552235	0.344	0.15	5.29033e-18	4	Nfkbiz
Btg1	6.8948e-21	0.330039	0.97	0.927	1.92972e-16	4	Btg1
Btg2	1.48408e-19	0.416214	0.829	0.669	4.15365e-15	4	Btg2
Ccl3.2	7.21222e-18	0.601471	0.713	0.561	2.01856e-13	4	Ccl3
Xcl1.1	1.06827e-17	0.597014	0.787	0.698	2.98988e-13	4	Xcl1
Nr4a1.1	2.5574e-17	0.495032	0.335	0.154	7.15765e-13	4	Nr4a1
Vps37b.1	4.01952e-16	0.431191	0.728	0.559	1.12498e-11	4	Vps37b
Tnfaip3	9.25817e-15	0.471977	0.482	0.29	2.59118e-10	4	Tnfaip3
Gadd45b	1.73105e-13	0.412094	0.186	0.075	4.84487e-09	4	Gadd45b
Bhlhe40	3.75519e-13	0.367234	0.626	0.474	1.051e-08	4	Bhlhe40
Tgif1	2.4652e-12	0.375549	0.234	0.095	6.89961e-08	4	Tgif1
Ifng.2	8.83629e-12	0.437579	0.554	0.375	2.4731e-07	4	Ifng
Nr4a3	1.28375e-10	0.298007	0.111	0.033	3.59297e-06	4	Nr4a3
Icam1	1.60034e-10	0.355123	0.198	0.103	4.47903e-06	4	Icam1
Tnfsf14	4.5609e-10	0.254776	0.135	0.067	1.2765e-05	4	Tnfsf14
Rel	8.93445e-10	0.327093	0.219	0.119	2.50057e-05	4	Rel
Litaf	1.02887e-09	0.313608	0.198	0.089	2.87959e-05	4	Litaf
Tagap	1.45665e-09	0.325242	0.165	0.065	4.07688e-05	4	Tagap
Serpinb9	4.11229e-09	0.310334	0.476	0.337	0.000115095	4	Serpinb9
Il2rg	6.0242e-09	0.276966	0.641	0.558	0.000168605	4	Il2rg
Plek.1	7.80238e-09	0.308116	0.482	0.399	0.000218373	4	Plek
Nr4a2	2.79093e-08	0.325166	0.473	0.379	0.000781125	4	Nr4a2
Egr1	4.18246e-08	0.283742	0.114	0.046	0.00117059	4	Egr1
Pim3	4.69703e-08	0.292366	0.275	0.185	0.00131461	4	Pim3
Relb	5.17763e-08	0.287929	0.219	0.11	0.00144912	4	Relb
Gm17056	6.39809e-08	0.263043	0.111	0.038	0.0017907	4	Gm17056
Gpr65	1.81566e-07	0.287677	0.263	0.172	0.00508168	4	Gpr65
Dusp1.1	1.94586e-07	0.300677	0.536	0.411	0.00544609	4	Dusp1
Ppp1r15a	2.06043e-07	0.288799	0.458	0.331	0.00576672	4	Ppp1r15a
Gem	2.66169e-07	0.324588	0.59	0.491	0.00744954	4	Gem
Phlda1	2.66326e-07	0.255428	0.159	0.069	0.00745394	4	Phlda1
Traf1	7.86821e-07	0.294662	0.41	0.338	0.0220216	4	Traf1
Tubb5	9.1845e-07	-0.288711	0.398	0.545	0.0257056	4	Tubb5
4930523C07Rik	1.05713e-06	0.25216	0.449	0.311	0.029587	4	4930523C07Rik
Nfkbid	1.59205e-06	0.271285	0.177	0.099	0.0445583	4	Nfkbid
Gzma.2	2.21972e-79	0.8601	0.99	0.935	6.21255e-75	5	Gzma
Lgals1.1	1.86586e-71	0.610114	0.994	0.936	5.22218e-67	5	Lgals1
Vim.2	1.32813e-62	0.645406	0.862	0.687	3.71718e-58	5	Vim
Rps18	5.32252e-60	-0.271376	0.996	1	1.48967e-55	5	Rps18
Klrg1.2	7.58724e-48	0.808809	0.285	0.054	2.12352e-43	5	Klrg1
Xcl1.2	1.53264e-47	-0.793385	0.461	0.758	4.28956e-43	5	Xcl1
Cma1.2	1.86378e-47	0.873184	0.402	0.135	5.21635e-43	5	Cma1
Ltb.1	2.23131e-47	-0.811802	0.181	0.513	6.245e-43	5	Ltb
Ctla2a	8.25254e-36	-0.495527	0.589	0.821	2.30972e-31	5	Ctla2a
S100a10	2.1092e-35	0.35208	0.959	0.936	5.90324e-31	5	S100a10
Rpl38	3.55224e-34	-0.252486	0.994	0.999	9.942e-30	5	Rpl38
H2afz	1.66261e-32	0.315436	0.998	0.983	4.65332e-28	5	H2afz
Zeb2.1	1.84618e-30	0.641924	0.404	0.188	5.1671e-26	5	Zeb2
Emp3	1.00928e-28	0.465484	0.809	0.615	2.82477e-24	5	Emp3
Rpl12	1.67199e-28	-0.275798	0.967	0.993	4.67956e-24	5	Rpl12
Ctsd	1.02893e-26	0.40459	0.866	0.762	2.87977e-22	5	Ctsd
AW112010	2.72601e-26	0.303833	1	0.998	7.62956e-22	5	AW112010
Ccl3.3	2.21628e-24	0.587049	0.754	0.542	6.20291e-20	5	Ccl3
Klrd1.1	1.86559e-23	0.318335	0.951	0.909	5.22141e-19	5	Klrd1
Gzmb.2	3.81598e-23	0.635755	0.516	0.366	1.06802e-18	5	Gzmb
Rps18-ps3	2.04496e-22	-0.282698	0.858	0.959	5.72343e-18	5	Rps18-ps3
Borcs7.1	1.88748e-21	0.484958	0.441	0.243	5.28268e-17	5	Borcs7
Pycard	3.12143e-21	0.360043	0.742	0.623	8.73627e-17	5	Pycard
Itm2b	3.02539e-20	0.277565	0.947	0.876	8.46747e-16	5	Itm2b
Serpina3g.1	2.77547e-18	-0.477131	0.272	0.466	7.76798e-14	5	Serpina3g
Stmn1	5.39055e-18	0.409638	0.272	0.114	1.50871e-13	5	Stmn1
Ly6c2.2	6.32043e-17	0.874272	0.248	0.123	1.76896e-12	5	Ly6c2
Ly6e.2	1.41075e-16	-0.353366	0.571	0.749	3.94841e-12	5	Ly6e
Itgam	1.86362e-16	0.393298	0.24	0.097	5.21589e-12	5	Itgam
Klra9.1	7.10138e-16	0.529273	0.512	0.368	1.98753e-11	5	Klra9
S1pr5	9.8753e-16	0.390762	0.187	0.082	2.7639e-11	5	S1pr5
Fgl2	1.22855e-13	0.39035	0.252	0.131	3.43846e-09	5	Fgl2
S100a6.3	3.86617e-13	0.406687	0.65	0.497	1.08206e-08	5	S100a6
Thy1.2	4.74979e-13	-0.411162	0.311	0.463	1.32937e-08	5	Thy1
Irf8.2	5.03353e-13	0.349534	0.705	0.55	1.40878e-08	5	Irf8
Serpinb6b.2	7.94668e-13	0.331936	0.555	0.453	2.22412e-08	5	Serpinb6b
Socs3	8.87987e-13	-0.358828	0.234	0.38	2.4853e-08	5	Socs3
Dapk2	1.45831e-12	0.331189	0.285	0.144	4.08151e-08	5	Dapk2
As3mt.1	2.73078e-12	0.32648	0.305	0.159	7.64291e-08	5	As3mt
Bcl2	2.82206e-12	-0.315917	0.618	0.748	7.89839e-08	5	Bcl2
Rap1b	1.03778e-11	0.336672	0.593	0.446	2.90454e-07	5	Rap1b
Cd9	5.18442e-11	0.320439	0.348	0.252	1.45102e-06	5	Cd9
Hmgb2	5.37679e-11	0.251472	0.803	0.755	1.50486e-06	5	Hmgb2
Sytl3	5.53466e-11	0.343519	0.321	0.197	1.54904e-06	5	Sytl3
Cd160	1.78876e-10	-0.327508	0.132	0.257	5.00637e-06	5	Cd160
S100a4.1	3.99387e-10	0.399683	0.246	0.133	1.1178e-05	5	S100a4
Cd3g.2	4.26995e-10	-0.345864	0.03	0.111	1.19507e-05	5	Cd3g
Sike1	5.07239e-10	0.294827	0.323	0.194	1.41966e-05	5	Sike1
Ccl4.3	6.30943e-10	0.425977	0.73	0.629	1.76588e-05	5	Ccl4
Lfng	1.2587e-09	0.298503	0.518	0.408	3.52286e-05	5	Lfng
Nme1.2	1.6583e-09	-0.298404	0.443	0.584	4.64125e-05	5	Nme1
Spn	2.96586e-09	0.333065	0.49	0.371	8.30086e-05	5	Spn
Itgb7.1	3.53138e-09	0.301069	0.374	0.241	9.88362e-05	5	Itgb7
Itgb2	5.96668e-09	0.273789	0.573	0.501	0.000166995	5	Itgb2
Klra3.1	6.73699e-09	0.392436	0.264	0.179	0.000188555	5	Klra3
Zfp512	7.32497e-09	-0.26845	0.28	0.405	0.000205011	5	Zfp512
Klrb1b	9.31775e-09	0.33547	0.25	0.144	0.000260785	5	Klrb1b
Itga4	1.06711e-08	0.318537	0.555	0.442	0.000298664	5	Itga4
Cd48	1.52118e-08	0.287992	0.453	0.345	0.000425747	5	Cd48
Pim2	1.56411e-08	-0.278319	0.128	0.245	0.000437764	5	Pim2
Neat1	1.78258e-08	0.293013	0.461	0.344	0.000498907	5	Neat1
Plek.2	3.3761e-08	0.251285	0.502	0.39	0.000944903	5	Plek
Ifng.3	3.4441e-08	0.362042	0.461	0.382	0.000963934	5	Ifng
Sepp1	4.45818e-08	0.285276	0.352	0.232	0.00124776	5	Sepp1
Dap	6.70398e-08	0.270879	0.376	0.257	0.00187631	5	Dap
Adgre5	6.77111e-08	0.264186	0.445	0.38	0.0018951	5	Adgre5
Mrpl9	7.43134e-08	0.252773	0.346	0.223	0.00207988	5	Mrpl9
Oard1	1.07807e-07	0.266004	0.278	0.176	0.00301731	5	Oard1
Cd3d.2	1.47014e-07	-0.28399	0.071	0.124	0.00411463	5	Cd3d
Txndc5	1.83284e-07	0.251992	0.248	0.146	0.00512975	5	Txndc5
Klf2	2.92674e-07	0.263369	0.301	0.198	0.00819135	5	Klf2
Rasgrp2	3.31545e-07	0.288547	0.311	0.214	0.00927928	5	Rasgrp2
Sat1	1.60114e-06	0.25243	0.524	0.406	0.0448126	5	Sat1
Dcxr	1.61709e-06	0.25924	0.242	0.169	0.045259	5	Dcxr
