# Supplementary material for: Single-cell transcriptome reveals the novel role of T-bet in suppressing the immature NK gene signature
Source: eLife journal article supplement (doi:10.7554/elife.51339), 2020-05-14
Supplement: supp [file elife-51339-supp-v1.zip › elife_poa_e51339_Supplementary_file_2.xlsx]

## Sheet: RaptorWTKO_NK_PCA_markers
Supplementary File 2. DEGs of clusters formed by WT and Raptor-deficient cells (logfc > 0.25; p_val_adj < 0.05). Related to Figure 3.
	p_val	avg_logFC	pct.1	pct.2	p_val_adj	cluster	gene
Cd3d	1.17886e-46	1.11658	0.397	0.073	3.29939e-42	1	Cd3d
Tmsb10	6.47062e-39	0.421315	1	0.999	1.811e-34	1	Tmsb10
Cd3g	5.21575e-37	0.857349	0.332	0.046	1.45978e-32	1	Cd3g
Ltb	2.06965e-20	0.616335	0.799	0.555	5.79253e-16	1	Ltb
Tmsb4x	8.35088e-20	0.337347	1	1	2.33725e-15	1	Tmsb4x
Thy1	8.72656e-20	0.623651	0.685	0.358	2.44239e-15	1	Thy1
Cd3e	2.09374e-19	0.308149	0.125	0.002	5.85995e-15	1	Cd3e
Mbnl1	8.16723e-18	0.40444	0.957	0.896	2.28584e-13	1	Mbnl1
Ctla2a	2.71133e-14	0.437887	0.864	0.652	7.58848e-10	1	Ctla2a
Ccl3	4.56948e-14	-0.984143	0.293	0.566	1.27891e-09	1	Ccl3
Cmtm7	6.43248e-14	-0.547308	0.44	0.688	1.80032e-09	1	Cmtm7
Cd52	1.98532e-13	0.269497	1	0.982	5.55651e-09	1	Cd52
Epsti1	1.96487e-12	0.409286	0.788	0.586	5.49928e-08	1	Epsti1
Crip1	9.29891e-12	0.328267	0.984	0.94	2.60258e-07	1	Crip1
Vps37b	2.05151e-11	-0.506124	0.424	0.665	5.74177e-07	1	Vps37b
Lck	2.19346e-11	0.306495	0.875	0.727	6.13906e-07	1	Lck
Mt1	4.58373e-11	-0.400013	0	0.121	1.2829e-06	1	Mt1
Ftl1	5.3085e-11	-0.376262	0.989	0.991	1.48574e-06	1	Ftl1
Il7r	1.11437e-09	0.341675	0.168	0.036	3.1189e-05	1	Il7r
mt-Nd2	1.15302e-09	0.255228	0.973	0.967	3.22708e-05	1	mt-Nd2
Ly6e	4.25262e-09	0.317453	0.902	0.796	0.000119022	1	Ly6e
Hcst	7.68772e-09	0.257207	0.962	0.899	0.000215164	1	Hcst
Arl4c	9.53102e-09	0.378781	0.364	0.186	0.000266754	1	Arl4c
Irf8	1.21511e-08	-0.524351	0.283	0.51	0.000340085	1	Irf8
S100a9	1.36831e-08	-1.8825	0.06	0.23	0.000382961	1	S100a9
Myh9	4.41128e-08	0.360501	0.587	0.411	0.00123463	1	Myh9
Zeb2	5.07332e-08	-0.453273	0.109	0.289	0.00141992	1	Zeb2
Gzmm	6.07707e-08	0.255993	0.174	0.048	0.00170085	1	Gzmm
Klra4	1.28308e-07	-0.418353	0.397	0.61	0.00359109	1	Klra4
Ccnd3	1.4078e-07	0.325421	0.663	0.515	0.00394016	1	Ccnd3
Ier2	1.66979e-07	-0.302587	0.614	0.801	0.00467341	1	Ier2
Hopx	2.59876e-07	0.273774	0.207	0.073	0.0072734	1	Hopx
Actb	3.22569e-07	0.280849	1	0.997	0.00902807	1	Actb
Pgs1	3.29752e-07	0.269682	0.25	0.116	0.00922911	1	Pgs1
Gstm1	4.29618e-07	-0.358789	0.103	0.271	0.0120242	1	Gstm1
Ccr2	4.3374e-07	0.312194	0.734	0.541	0.0121395	1	Ccr2
Serpinb6b	4.71194e-07	-0.345113	0.337	0.541	0.0131878	1	Serpinb6b
Il2rb	4.85774e-07	0.292772	0.815	0.718	0.0135958	1	Il2rb
Cd7	5.40539e-07	0.352578	0.804	0.671	0.0151286	1	Cd7
Ifngr1	8.85071e-07	-0.382233	0.636	0.789	0.0247714	1	Ifngr1
Dnajc15	9.87247e-07	0.261454	0.745	0.572	0.0276311	1	Dnajc15
Klk8	1.51651e-06	0.259054	0.168	0.065	0.042444	1	Klk8
Gzma.1	4.26673e-43	0.64918	0.984	0.731	1.19417e-38	2	Gzma
Ccr2.1	3.04749e-37	0.627878	0.874	0.506	8.52933e-33	2	Ccr2
Vim.1	5.62841e-31	0.612675	0.897	0.711	1.57528e-26	2	Vim
Actg1	5.61752e-29	0.376759	1	0.991	1.57223e-24	2	Actg1
H2afz	1.05489e-27	0.403617	0.996	0.973	2.95243e-23	2	H2afz
Tmsb4x.1	2.03579e-27	0.328088	1	1	5.69777e-23	2	Tmsb4x
Ctla2a.1	5.17179e-26	0.571267	0.87	0.641	1.44748e-21	2	Ctla2a
Tyrobp	5.39449e-25	0.366558	0.996	0.986	1.50981e-20	2	Tyrobp
Rpl12	8.00975e-25	-0.422678	1	0.997	2.24177e-20	2	Rpl12
S100a10	1.16808e-24	0.38593	0.992	0.913	3.26922e-20	2	S100a10
Epsti1.1	6.21104e-24	0.499007	0.834	0.568	1.73835e-19	2	Epsti1
AW112010	2.11066e-23	0.354836	1	0.981	5.90732e-19	2	AW112010
Wdr89	3.18982e-22	-0.355512	1	0.995	8.92767e-18	2	Wdr89
Ypel3	9.47583e-21	0.43056	0.858	0.65	2.6521e-16	2	Ypel3
Jak1	6.17832e-20	0.388954	0.933	0.777	1.72919e-15	2	Jak1
Ftl1.1	8.42262e-20	-0.41846	1	0.989	2.35732e-15	2	Ftl1
Rps19	5.5139e-19	-0.320073	1	0.999	1.54323e-14	2	Rps19
Arhgdib	2.80005e-18	0.332605	0.964	0.899	7.83678e-14	2	Arhgdib
Crip1.1	5.75887e-18	0.330909	0.992	0.937	1.61179e-13	2	Crip1
Cd52.1	8.19009e-18	0.289103	1	0.981	2.29224e-13	2	Cd52
Lgals1.1	9.1153e-18	0.341119	0.976	0.887	2.55119e-13	2	Lgals1
Sell	2.09575e-17	0.38205	0.842	0.619	5.86558e-13	2	Sell
Ms4a4b	2.43334e-17	0.322474	0.972	0.886	6.81042e-13	2	Ms4a4b
Tm6sf1	6.2075e-17	0.454022	0.613	0.359	1.73735e-12	2	Tm6sf1
Ccl5	2.48112e-16	0.392932	1	0.997	6.94417e-12	2	Ccl5
Pycard	4.08837e-16	0.409076	0.759	0.583	1.14425e-11	2	Pycard
Nkg7	4.85513e-16	0.251021	1	0.989	1.35885e-11	2	Nkg7
Ucp2	1.73995e-15	0.381066	0.783	0.575	4.86977e-11	2	Ucp2
Rps27rt	3.8508e-15	-0.291146	1	0.999	1.07776e-10	2	Rps27rt
Myl6	3.88405e-15	0.290705	0.984	0.956	1.08707e-10	2	Myl6
Bin2	6.4808e-15	0.361493	0.814	0.595	1.81385e-10	2	Bin2
Coro1a	7.17628e-14	0.29181	0.98	0.91	2.0085e-09	2	Coro1a
Serpinb6b.1	8.9044e-14	0.427561	0.684	0.489	2.49216e-09	2	Serpinb6b
Ahnak	1.66592e-13	0.345438	0.866	0.701	4.66259e-09	2	Ahnak
Selplg	2.23675e-13	0.290533	0.933	0.856	6.26021e-09	2	Selplg
Dok2	3.7663e-13	0.340673	0.751	0.519	1.05411e-08	2	Dok2
Rpl36a	4.3236e-13	-0.26902	0.996	0.993	1.21009e-08	2	Rpl36a
Rps20	5.8507e-13	-0.254883	1	0.999	1.63749e-08	2	Rps20
Lck.1	8.70187e-13	0.342172	0.877	0.72	2.43548e-08	2	Lck
Cd47	8.73695e-13	0.279396	0.925	0.869	2.4453e-08	2	Cd47
Gmfg	2.79666e-12	0.327958	0.838	0.708	7.8273e-08	2	Gmfg
Cd2	3.79099e-12	0.362747	0.779	0.603	1.06102e-07	2	Cd2
Ccl3.1	4.78569e-12	0.626297	0.652	0.515	1.33942e-07	2	Ccl3
Zyx	5.41685e-12	0.31801	0.763	0.542	1.51607e-07	2	Zyx
Hmgb2	6.67855e-12	0.25211	0.885	0.735	1.86919e-07	2	Hmgb2
Scimp	1.033e-11	0.336313	0.241	0.079	2.89116e-07	2	Scimp
S100a9.1	1.46331e-11	-1.94655	0.063	0.238	4.09552e-07	2	S100a9
Car2	2.41152e-11	0.361832	0.605	0.394	6.74935e-07	2	Car2
Ptprc	2.55909e-11	0.265856	0.968	0.91	7.16239e-07	2	Ptprc
Plek	3.42827e-11	0.335739	0.577	0.352	9.59504e-07	2	Plek
Arhgef1	3.93917e-11	0.305869	0.767	0.602	1.10249e-06	2	Arhgef1
Rps28	4.63428e-11	-0.256724	1	0.998	1.29704e-06	2	Rps28
Sh2d2a	5.56779e-11	0.333303	0.704	0.491	1.55831e-06	2	Sh2d2a
Rasgrp2	6.80336e-11	0.321788	0.387	0.185	1.90413e-06	2	Rasgrp2
Klra8.1	1.23849e-10	0.582392	0.656	0.546	3.46627e-06	2	Klra8
Dnajc15.1	1.37241e-10	0.351026	0.727	0.566	3.8411e-06	2	Dnajc15
Ppp1r18	2.10748e-10	0.337958	0.668	0.476	5.89841e-06	2	Ppp1r18
Chchd10	2.30888e-10	-0.387033	0.032	0.16	6.46209e-06	2	Chchd10
Klra4.1	2.62869e-10	0.501389	0.676	0.57	7.35719e-06	2	Klra4
Mif	4.72148e-10	-0.356036	0.522	0.689	1.32145e-05	2	Mif
Il10rb	5.13436e-10	0.312829	0.613	0.418	1.43701e-05	2	Il10rb
Sh2d1a	5.46536e-10	0.304868	0.688	0.504	1.52964e-05	2	Sh2d1a
Prex1	1.03519e-09	0.266768	0.561	0.345	2.8973e-05	2	Prex1
Sp100	1.379e-09	0.290211	0.692	0.504	3.85955e-05	2	Sp100
Ctla2b	1.64439e-09	0.330493	0.549	0.375	4.60231e-05	2	Ctla2b
S100a6.1	1.74867e-09	0.376495	0.573	0.362	4.89418e-05	2	S100a6
Qrfp	1.83376e-09	0.346041	0.372	0.196	5.13232e-05	2	Qrfp
Itgb1	2.35897e-09	0.282494	0.708	0.504	6.60227e-05	2	Itgb1
Cmah	2.51701e-09	0.300391	0.225	0.084	7.04462e-05	2	Cmah
Samd3	3.06825e-09	0.303943	0.569	0.369	8.58741e-05	2	Samd3
Gnl3	3.68215e-09	-0.325647	0.126	0.283	0.000103056	2	Gnl3
Abracl	6.50504e-09	0.26669	0.751	0.647	0.000182063	2	Abracl
Cd7.1	6.79733e-09	0.264544	0.814	0.663	0.000190244	2	Cd7
As3mt	9.61107e-09	0.30222	0.269	0.114	0.000268995	2	As3mt
Evl	1.16481e-08	0.263497	0.771	0.633	0.000326006	2	Evl
Eomes	1.24022e-08	0.3068	0.64	0.467	0.000347112	2	Eomes
Mt1.1	1.50788e-08	-0.377105	0.02	0.123	0.000422026	2	Mt1
Ccr5	1.5913e-08	0.302719	0.395	0.218	0.000445373	2	Ccr5
Anxa2	1.63732e-08	0.251249	0.87	0.785	0.000458255	2	Anxa2
Wdr95	1.7119e-08	0.284464	0.217	0.083	0.000479127	2	Wdr95
Tuba1b	1.72309e-08	-0.373065	0.3	0.468	0.000482258	2	Tuba1b
Arl5c	2.07339e-08	0.297055	0.245	0.108	0.000580301	2	Arl5c
Hsp90ab1	2.08958e-08	-0.250333	0.87	0.915	0.000584833	2	Hsp90ab1
Zbtb20	2.10441e-08	0.336615	0.593	0.434	0.000588981	2	Zbtb20
Borcs7	3.62901e-08	0.320677	0.364	0.195	0.00101569	2	Borcs7
Sike1	3.67926e-08	0.26787	0.364	0.192	0.00102975	2	Sike1
Hspe1	5.92941e-08	-0.283417	0.64	0.748	0.00165952	2	Hspe1
Esd	7.32777e-08	0.271985	0.581	0.416	0.0020509	2	Esd
Ubash3b	7.77817e-08	0.266073	0.304	0.15	0.00217696	2	Ubash3b
Klra7	7.94144e-08	0.322173	0.787	0.655	0.00222265	2	Klra7
Dcp1b	8.8857e-08	0.297282	0.19	0.076	0.00248693	2	Dcp1b
Nop10	8.9245e-08	-0.297858	0.609	0.714	0.00249779	2	Nop10
Gimap1	9.45772e-08	0.272554	0.798	0.715	0.00264703	2	Gimap1
St3gal6	1.37384e-07	0.290561	0.522	0.369	0.00384511	2	St3gal6
Ppp1r12a	1.52746e-07	0.26508	0.545	0.367	0.00427504	2	Ppp1r12a
Tpm4	1.54886e-07	0.269893	0.692	0.542	0.00433495	2	Tpm4
AB124611	1.65184e-07	0.271244	0.581	0.407	0.00462316	2	AB124611
Ranbp1	1.69903e-07	-0.306289	0.316	0.484	0.00475523	2	Ranbp1
Itgal	1.80821e-07	0.27579	0.64	0.471	0.00506083	2	Itgal
Ikzf2	2.07639e-07	-0.357661	0.158	0.317	0.00581139	2	Ikzf2
S1pr4	4.07245e-07	0.291077	0.431	0.27	0.011398	2	S1pr4
Dock2	4.92494e-07	0.268652	0.648	0.49	0.0137839	2	Dock2
Fcgr3	7.86624e-07	0.265089	0.399	0.251	0.022016	2	Fcgr3
Tnfrsf18	9.17413e-07	0.267081	0.498	0.345	0.0256766	2	Tnfrsf18
Usp3	1.01144e-06	0.255916	0.375	0.252	0.0283081	2	Usp3
Sipa1	1.12817e-06	0.263355	0.53	0.377	0.0315751	2	Sipa1
Mndal	1.13005e-06	0.253574	0.577	0.409	0.0316278	2	Mndal
Ankrd11	1.20086e-06	0.250797	0.621	0.462	0.0336096	2	Ankrd11
Ctla2a.2	1.9915e-22	0.495273	0.917	0.641	5.5738e-18	3	Ctla2a
Ccr2.2	4.92782e-21	0.464216	0.854	0.521	1.3792e-16	3	Ccr2
Tmsb4x.2	1.27437e-17	0.294376	1	1	3.56672e-13	3	Tmsb4x
Pfn1	2.64512e-16	0.283621	1	0.998	7.40316e-12	3	Pfn1
Cd52.2	1.51826e-14	0.271954	1	0.982	4.24931e-10	3	Cd52
Tyrobp.1	4.85692e-14	0.270263	1	0.986	1.35935e-09	3	Tyrobp
AW112010.1	8.78963e-14	0.29723	1	0.982	2.46004e-09	3	AW112010
Ctla2b.1	7.13019e-13	0.30916	0.644	0.368	1.9956e-08	3	Ctla2b
Coro1a.1	9.91881e-13	0.282043	0.985	0.912	2.77608e-08	3	Coro1a
Ftl1.2	3.43011e-11	-0.372892	0.995	0.99	9.60018e-07	3	Ftl1
Lck.2	3.7567e-09	0.275292	0.893	0.723	0.000105142	3	Lck
Ikzf2.1	8.82885e-09	-0.431391	0.146	0.313	0.000247102	3	Ikzf2
Vps37b.1	6.95473e-07	-0.35882	0.541	0.652	0.0194649	3	Vps37b
Klra7.1	1.09799e-06	0.358373	0.79	0.659	0.0307304	3	Klra7
Mt1.2	1.2784e-06	-0.363491	0.029	0.119	0.0357798	3	Mt1
Eif5a	1.34025e-29	0.553453	0.966	0.878	3.75109e-25	4	Eif5a
Nme1.1	3.09211e-24	0.55746	0.742	0.568	8.6542e-20	4	Nme1
Pfn1.1	1.04071e-23	0.420994	1	0.998	2.91275e-19	4	Pfn1
Ran	6.22677e-22	0.480473	0.809	0.662	1.74275e-17	4	Ran
Cd52.3	1.05872e-17	0.420309	0.994	0.983	2.96316e-13	4	Cd52
Irf8.2	8.75852e-17	0.666954	0.663	0.463	2.45134e-12	4	Irf8
Xcl1	7.94728e-16	0.693323	0.882	0.747	2.22429e-11	4	Xcl1
Srm	8.89416e-16	0.438816	0.298	0.084	2.4893e-11	4	Srm
Ddx21	1.71101e-15	0.441843	0.674	0.443	4.78877e-11	4	Ddx21
Tnfrsf9	3.5193e-15	0.566804	0.365	0.173	9.84982e-11	4	Tnfrsf9
Serbp1	1.49448e-14	0.340479	0.949	0.863	4.18274e-10	4	Serbp1
Ranbp1.1	1.51874e-14	0.454918	0.663	0.433	4.25065e-10	4	Ranbp1
Gzmb.2	4.31887e-14	0.800654	0.528	0.333	1.20876e-09	4	Gzmb
Mif.1	7.71364e-14	0.414009	0.747	0.653	2.15889e-09	4	Mif
Ccl4.2	1.28336e-13	0.966379	0.758	0.544	3.59188e-09	4	Ccl4
Ypel3.1	1.13804e-12	-0.476269	0.444	0.71	3.18514e-08	4	Ypel3
Gnl3.1	1.58086e-12	0.427524	0.461	0.235	4.42451e-08	4	Gnl3
Mettl1	2.0278e-12	0.369558	0.281	0.088	5.6754e-08	4	Mettl1
Cyba	7.09447e-12	0.35199	0.944	0.884	1.9856e-07	4	Cyba
Cfl1	7.76313e-12	0.311255	0.989	0.964	2.17275e-07	4	Cfl1
Cd7.2	2.23596e-11	-0.436183	0.455	0.714	6.258e-07	4	Cd7
Gzma.2	6.21588e-11	0.316268	0.927	0.751	1.7397e-06	4	Gzma
Eif4a1	2.31976e-10	0.327232	0.82	0.708	6.49256e-06	4	Eif4a1
Rps27l	2.97546e-10	0.313078	0.719	0.636	8.32772e-06	4	Rps27l
Tmsb4x.3	4.93418e-10	0.293976	1	1	1.38098e-05	4	Tmsb4x
Cox7c	7.76202e-10	0.256374	0.978	0.927	2.17243e-05	4	Cox7c
Myl12a	9.84402e-10	0.34648	0.848	0.775	2.75514e-05	4	Myl12a
Ldha	1.33848e-09	0.326528	0.736	0.615	3.74613e-05	4	Ldha
Nop10.1	1.45947e-09	0.316807	0.775	0.689	4.08476e-05	4	Nop10
Nhp2	2.93079e-09	0.330073	0.506	0.364	8.20271e-05	4	Nhp2
Nolc1	3.03849e-09	0.343664	0.303	0.133	8.50413e-05	4	Nolc1
Polr2l	3.86179e-09	0.351892	0.449	0.27	0.000108084	4	Polr2l
Nhp2l1	7.85502e-09	0.302035	0.697	0.591	0.000219846	4	Nhp2l1
Nop58	8.05336e-09	0.318118	0.399	0.192	0.000225397	4	Nop58
Uqcrq	9.51129e-09	0.329914	0.792	0.629	0.000266202	4	Uqcrq
Slc25a5	1.13751e-08	0.295079	0.876	0.799	0.000318367	4	Slc25a5
Nutf2	1.16991e-08	0.301942	0.315	0.131	0.000327434	4	Nutf2
Khdc1a.2	1.2161e-08	0.518138	0.331	0.148	0.000340361	4	Khdc1a
Fbl	2.79521e-08	0.339406	0.624	0.433	0.000782324	4	Fbl
Emc6	2.93285e-08	0.324083	0.573	0.376	0.000820846	4	Emc6
Ptprc.1	3.52941e-08	0.284981	0.961	0.914	0.000987812	4	Ptprc
Cycs	3.94845e-08	0.335106	0.702	0.537	0.00110509	4	Cycs
Ftl1.3	4.42273e-08	-0.305854	0.989	0.991	0.00123783	4	Ftl1
Tcerg1	4.79024e-08	0.262687	0.315	0.133	0.00134069	4	Tcerg1
Sub1	7.44479e-08	0.256997	0.989	0.95	0.00208365	4	Sub1
Snrpd1	8.67903e-08	0.302672	0.522	0.374	0.00242909	4	Snrpd1
Fkbp1a	1.02136e-07	0.298905	0.635	0.475	0.00285858	4	Fkbp1a
Ccnd2.1	1.37735e-07	0.368629	0.775	0.677	0.00385492	4	Ccnd2
Vim.2	1.43092e-07	-0.43355	0.567	0.76	0.00400487	4	Vim
Lcp1	1.80085e-07	0.344218	0.758	0.652	0.00504023	4	Lcp1
Gar1	2.55708e-07	0.32265	0.421	0.259	0.00715676	4	Gar1
Mybbp1a	2.78552e-07	0.252844	0.264	0.106	0.0077961	4	Mybbp1a
Erh	2.79832e-07	0.26322	0.747	0.605	0.00783193	4	Erh
Vasp	2.95869e-07	0.276047	0.888	0.747	0.00828077	4	Vasp
Hnrnpab	3.1944e-07	0.308446	0.466	0.301	0.0089405	4	Hnrnpab
Tln1	3.8604e-07	0.317667	0.736	0.58	0.0108045	4	Tln1
Ccl3.2	4.75805e-07	0.551762	0.685	0.518	0.0133168	4	Ccl3
Pou2f2.2	5.14548e-07	0.384537	0.275	0.162	0.0144012	4	Pou2f2
Odc1	5.19263e-07	0.281598	0.343	0.167	0.0145331	4	Odc1
Eef1e1	5.95446e-07	0.280019	0.343	0.172	0.0166653	4	Eef1e1
Nfkbia.1	1.12463e-06	0.433216	0.685	0.55	0.0314763	4	Nfkbia
Fubp1	1.35362e-06	0.30655	0.59	0.4	0.0378851	4	Fubp1
Rps18	6.91437e-76	-0.583722	0.993	1	1.93519e-71	5	Rps18
Rpl13	1.11354e-71	-0.491872	0.993	1	3.11656e-67	5	Rpl13
Rpl17	3.60566e-68	-0.509412	1	1	1.00915e-63	5	Rpl17
Rps15a	1.30949e-67	-0.5139	0.993	1	3.665e-63	5	Rps15a
Rpl38	2.25135e-65	-0.434193	0.993	1	6.30107e-61	5	Rpl38
Rps24	3.61526e-64	-0.456002	1	1	1.01184e-59	5	Rps24
Rps28.1	3.40224e-63	-0.605891	0.978	1	9.52219e-59	5	Rps28
Rps19.1	2.41442e-62	-0.584202	0.993	1	6.75748e-58	5	Rps19
Rps7	1.2261e-61	-0.465338	1	1	3.4316e-57	5	Rps7
Rpl23	4.23095e-61	-0.458225	1	1	1.18416e-56	5	Rpl23
Rpl12.1	4.48159e-61	-0.683606	0.986	0.999	1.25431e-56	5	Rpl12
Rps27	4.57718e-60	-0.394449	1	1	1.28106e-55	5	Rps27
Rpl18a	1.58047e-59	-0.456144	0.993	1	4.42343e-55	5	Rpl18a
Rpl23a	1.29793e-56	-0.397549	1	1	3.63265e-52	5	Rpl23a
Rplp1	2.29606e-56	-0.404962	1	1	6.42622e-52	5	Rplp1
Gzma.3	4.03382e-54	1.51298	0.957	0.753	1.12898e-49	5	Gzma
Rpl34	6.92371e-54	-0.34512	1	1	1.93781e-49	5	Rpl34
Rplp2	1.66932e-53	-0.414521	1	1	4.6721e-49	5	Rplp2
Rpl32	3.23127e-53	-0.409635	0.986	1	9.04367e-49	5	Rpl32
Rps6	3.14072e-51	-0.446445	0.993	1	8.79024e-47	5	Rps6
Rps16	4.94451e-51	-0.368785	1	1	1.38387e-46	5	Rps16
Rps27a	2.30878e-50	-0.379884	1	1	6.46182e-46	5	Rps27a
Rps5	5.50578e-49	-0.440579	0.986	1	1.54096e-44	5	Rps5
Rpl37a	1.25612e-48	-0.335826	1	1	3.51563e-44	5	Rpl37a
Rps3a1	4.42927e-48	-0.365592	0.993	1	1.23967e-43	5	Rps3a1
Rpl39	1.85697e-47	-0.366762	1	1	5.19728e-43	5	Rpl39
H2afz.1	2.21242e-47	0.783674	0.993	0.975	6.19213e-43	5	H2afz
Rpsa	5.72126e-47	-0.466634	0.993	1	1.60127e-42	5	Rpsa
Rps14	7.72124e-47	-0.32156	1	1	2.16102e-42	5	Rps14
Rps20.1	1.28915e-45	-0.506297	0.993	1	3.60807e-41	5	Rps20
Rpl37	5.13794e-45	-0.349305	1	1	1.43801e-40	5	Rpl37
Rps23	6.96983e-45	-0.309219	1	1	1.95072e-40	5	Rps23
Rps10	1.68021e-44	-0.385247	0.993	1	4.70256e-40	5	Rps10
Rpl18	3.63795e-44	-0.443332	0.978	0.999	1.01819e-39	5	Rpl18
Rps15	1.56662e-42	-0.398477	0.993	1	4.38466e-38	5	Rps15
Gm9493	2.0662e-42	-0.493615	0.957	0.999	5.78287e-38	5	Gm9493
Rps4x	5.71191e-42	-0.38447	0.993	1	1.59865e-37	5	Rps4x
Rpl4	1.66727e-41	-0.397756	0.993	1	4.66635e-37	5	Rpl4
Rpl3	4.2127e-41	-0.422251	0.986	1	1.17905e-36	5	Rpl3
Rpl36	9.60526e-41	-0.326093	0.986	1	2.68832e-36	5	Rpl36
Rps21	2.80513e-40	-0.349782	0.986	1	7.851e-36	5	Rps21
Eef1a1	1.32462e-39	-0.293897	1	1	3.70735e-35	5	Eef1a1
Rps3	1.99062e-39	-0.369005	1	1	5.57133e-35	5	Rps3
S100a9.4	2.4749e-39	3.76526	0.079	0.224	6.92674e-35	5	S100a9
Rps27rt.1	2.50667e-39	-0.492018	0.993	1	7.01567e-35	5	Rps27rt
Rps13	6.26513e-38	-0.334798	1	1	1.75348e-33	5	Rps13
Rpl21	8.41639e-38	-0.327157	1	1	2.35558e-33	5	Rpl21
Rpl30	8.49967e-37	-0.344582	0.978	1	2.37889e-32	5	Rpl30
Rpl9	1.00326e-36	-0.308192	0.993	1	2.80794e-32	5	Rpl9
Hmgb2.1	1.2728e-36	0.920909	0.741	0.76	3.56232e-32	5	Hmgb2
Rps9	1.28585e-36	-0.412193	0.993	0.998	3.59885e-32	5	Rps9
Rplp0	2.87283e-36	-0.397828	0.986	0.999	8.04049e-32	5	Rplp0
Rpl19	3.50019e-36	-0.274967	1	1	9.79633e-32	5	Rpl19
Rpl13a	7.96116e-36	-0.258857	1	1	2.22817e-31	5	Rpl13a
S100a10.1	7.98382e-36	0.600043	0.892	0.928	2.23451e-31	5	S100a10
Rpl36a.1	9.1111e-36	-0.488234	0.95	0.997	2.55001e-31	5	Rpl36a
Rpl26	9.43721e-36	-0.312763	1	1	2.64129e-31	5	Rpl26
Rpl23a-ps3	9.8496e-36	-0.388043	0.993	0.999	2.7567e-31	5	Rpl23a-ps3
Lgals1.3	2.45638e-35	0.864427	0.978	0.894	6.8749e-31	5	Lgals1
Rpl10a	1.05133e-34	-0.388148	0.971	0.998	2.94246e-30	5	Rpl10a
Rpl35	1.35803e-33	-0.388189	1	1	3.80086e-29	5	Rpl35
Tpt1	3.14667e-33	-0.270648	1	1	8.80689e-29	5	Tpt1
Emp3	1.45097e-32	0.763509	0.82	0.613	4.06097e-28	5	Emp3
Cma1	2.16936e-32	1.08321	0.403	0.067	6.07161e-28	5	Cma1
Rps29	5.51972e-32	-0.259644	1	1	1.54486e-27	5	Rps29
Wdr89.1	7.3344e-32	-0.495525	0.978	0.997	2.05275e-27	5	Wdr89
Rps8	1.45901e-31	-0.337518	0.993	1	4.08346e-27	5	Rps8
S100a8.3	1.68675e-31	4.0882	0.079	0.18	4.72089e-27	5	S100a8
Rpl15	2.95425e-31	-0.422941	0.957	0.997	8.26836e-27	5	Rpl15
Rps18-ps3	1.05281e-30	-0.662124	0.712	0.958	2.94662e-26	5	Rps18-ps3
Rpl6	1.35685e-30	-0.312899	1	1	3.79756e-26	5	Rpl6
Rpl14	2.62786e-30	-0.308361	0.986	0.999	7.35485e-26	5	Rpl14
Rpl8	3.58824e-29	-0.303961	1	1	1.00428e-24	5	Rpl8
Gm8730	6.14091e-29	-0.42584	0.921	0.996	1.71872e-24	5	Gm8730
Rpl11	8.66734e-29	-0.27932	0.986	0.999	2.42581e-24	5	Rpl11
Rpl5	5.92996e-28	-0.361443	0.978	0.999	1.65968e-23	5	Rpl5
Rpl29	7.19569e-28	-0.328997	0.957	0.999	2.01393e-23	5	Rpl29
Rps11	1.38982e-26	-0.279048	0.993	1	3.88981e-22	5	Rps11
Rps2	2.45828e-26	-0.355722	0.971	0.999	6.88023e-22	5	Rps2
AW112010.2	5.1268e-26	0.682242	0.986	0.984	1.43489e-21	5	AW112010
Tmsb4x.4	6.2317e-26	0.48738	1	1	1.74413e-21	5	Tmsb4x
Rpl27	7.29115e-26	-0.254306	0.993	1	2.04065e-21	5	Rpl27
Hmgn2	3.37309e-25	0.676491	0.46	0.323	9.4406e-21	5	Hmgn2
Ltb.2	3.02023e-24	-0.957883	0.18	0.619	8.45302e-20	5	Ltb
Vim.3	3.32122e-24	0.714852	0.871	0.728	9.29543e-20	5	Vim
S100a13	5.34229e-24	0.59468	0.806	0.582	1.4952e-19	5	S100a13
Rpl22	6.1112e-24	-0.348013	0.928	0.996	1.7104e-19	5	Rpl22
Gnb2l1	1.10851e-23	-0.361299	0.928	0.995	3.10249e-19	5	Gnb2l1
Eef1b2	1.3538e-23	-0.425124	0.842	0.98	3.78901e-19	5	Eef1b2
Arpc1b	3.60095e-23	0.47056	0.993	0.946	1.00783e-18	5	Arpc1b
Rps26	3.02381e-22	-0.313069	0.978	0.999	8.46303e-18	5	Rps26
Myl6.1	4.96998e-22	0.477703	0.957	0.961	1.391e-17	5	Myl6
H2afv	6.23739e-22	0.521786	0.683	0.587	1.74572e-17	5	H2afv
Rpl13-ps3	1.18624e-21	-0.468391	0.806	0.974	3.32006e-17	5	Rpl13-ps3
Gm2000	1.54457e-21	-0.410978	0.921	0.986	4.32295e-17	5	Gm2000
Calm1	2.69176e-21	0.502343	0.914	0.859	7.53369e-17	5	Calm1
Ly6c2.1	3.44371e-21	1.48365	0.396	0.11	9.63826e-17	5	Ly6c2
Zeb2.1	5.7514e-21	0.779636	0.46	0.251	1.6097e-16	5	Zeb2
Rpl7a	8.61331e-21	-0.302592	0.935	0.994	2.41069e-16	5	Rpl7a
Gm10073	3.15158e-20	-0.338618	0.957	0.992	8.82065e-16	5	Gm10073
Arpc2	6.33155e-20	0.440494	0.957	0.944	1.77207e-15	5	Arpc2
Dap	9.24336e-20	0.535011	0.417	0.287	2.58703e-15	5	Dap
Gm6133	1.65435e-19	-0.515458	0.748	0.939	4.6302e-15	5	Gm6133
Xcl1.1	1.96276e-19	-0.894842	0.439	0.792	5.49337e-15	5	Xcl1
Itgam	2.63161e-19	0.611069	0.309	0.074	7.36536e-15	5	Itgam
S100a11	4.03777e-19	0.603536	0.871	0.848	1.13009e-14	5	S100a11
Eef1g	1.10259e-18	-0.396381	0.791	0.97	3.08592e-14	5	Eef1g
Ccnb2	1.73712e-17	0.477196	0.158	0.007	4.86184e-13	5	Ccnb2
Atp1b1	4.13168e-17	0.319715	0.324	0.369	1.15638e-12	5	Atp1b1
Npm1	4.6519e-17	-0.479446	0.77	0.951	1.30197e-12	5	Npm1
Stmn1	7.45756e-17	0.691614	0.324	0.108	2.08722e-12	5	Stmn1
Arhgdib.1	8.21896e-17	0.4329	0.942	0.906	2.30032e-12	5	Arhgdib
Irf8.3	1.19392e-16	0.707233	0.712	0.464	3.34154e-12	5	Irf8
Klrg1	1.83638e-16	0.759009	0.237	0.062	5.13965e-12	5	Klrg1
Lfng	1.98849e-16	0.439754	0.583	0.556	5.56538e-12	5	Lfng
Rpl9-ps6	2.64485e-16	-0.313006	0.942	0.991	7.40241e-12	5	Rpl9-ps6
Gzmb.3	3.18148e-16	0.842376	0.54	0.337	8.90432e-12	5	Gzmb
Cd9	3.72704e-16	0.513359	0.388	0.243	1.04312e-11	5	Cd9
Itgb2	6.01366e-16	0.590146	0.683	0.472	1.6831e-11	5	Itgb2
Gm11808	6.73765e-16	-0.306419	0.942	0.99	1.88573e-11	5	Gm11808
H3f3b	1.03635e-15	0.362165	1	0.998	2.90053e-11	5	H3f3b
Tyrobp.2	1.43665e-15	0.418091	1	0.987	4.02091e-11	5	Tyrobp
Gm9843	2.5914e-15	-0.250078	0.993	0.999	7.25281e-11	5	Gm9843
Cd48	3.2643e-15	0.489259	0.525	0.354	9.13612e-11	5	Cd48
Uba52	3.51949e-15	-0.34511	0.892	0.989	9.85035e-11	5	Uba52
Cdc42	4.06435e-15	0.41384	0.878	0.817	1.13753e-10	5	Cdc42
Il18rap	4.43941e-15	0.555552	0.59	0.397	1.2425e-10	5	Il18rap
Ndufb7	4.4818e-15	0.283414	0.633	0.704	1.25437e-10	5	Ndufb7
Tpm3	5.21686e-15	0.410894	0.856	0.768	1.46009e-10	5	Tpm3
Shfm1	5.36973e-15	0.351236	0.806	0.836	1.50288e-10	5	Shfm1
Ndufa4	6.84514e-15	0.371538	0.806	0.797	1.91582e-10	5	Ndufa4
Anxa2.1	8.39909e-15	0.456711	0.863	0.792	2.35074e-10	5	Anxa2
Cenpa	1.05777e-14	0.447811	0.201	0.14	2.96048e-10	5	Cenpa
Bin2.1	1.14494e-14	0.495179	0.741	0.618	3.20446e-10	5	Bin2
Eef2	1.4441e-14	-0.280037	0.942	0.994	4.04175e-10	5	Eef2
Itm2b	2.36086e-14	0.382153	0.942	0.912	6.60758e-10	5	Itm2b
Rpl6l	2.45048e-14	-0.297194	0.892	0.987	6.8584e-10	5	Rpl6l
Mrpl33	3.27084e-14	0.413157	0.669	0.606	9.15442e-10	5	Mrpl33
Gm10522	5.83487e-14	0.516404	0.209	0.036	1.63306e-09	5	Gm10522
Gng5	6.13406e-14	0.336641	0.856	0.875	1.7168e-09	5	Gng5
Nkg7.1	8.64368e-14	0.406673	0.978	0.992	2.41919e-09	5	Nkg7
Ptprc.2	9.33965e-14	0.436338	0.935	0.918	2.61398e-09	5	Ptprc
Cfl1.1	1.17299e-13	0.369727	0.971	0.966	3.28295e-09	5	Cfl1
Ostf1	1.20408e-13	0.382668	0.784	0.724	3.36998e-09	5	Ostf1
Prdx5	1.21301e-13	0.447289	0.504	0.519	3.39496e-09	5	Prdx5
Arpc3	1.49299e-13	0.331794	0.791	0.815	4.17859e-09	5	Arpc3
Spn	1.50957e-13	0.578752	0.475	0.369	4.22498e-09	5	Spn
Rap1b	2.06124e-13	0.546706	0.576	0.371	5.76899e-09	5	Rap1b
Fxyd5	2.11154e-13	0.379927	0.928	0.927	5.90978e-09	5	Fxyd5
Rpl28	2.15317e-13	-0.252583	0.971	0.997	6.0263e-09	5	Rpl28
Psmb3	2.95979e-13	0.351373	0.576	0.554	8.28386e-09	5	Psmb3
Psma3	3.63524e-13	0.271962	0.518	0.573	1.01743e-08	5	Psma3
Ctsd	3.71257e-13	0.455697	0.892	0.836	1.03907e-08	5	Ctsd
Cyba.1	3.75762e-13	0.426515	0.906	0.889	1.05168e-08	5	Cyba
Rps17	4.51498e-13	-0.259818	0.978	0.999	1.26365e-08	5	Rps17
Itga4	5.89391e-13	0.521227	0.647	0.58	1.64959e-08	5	Itga4
Actg1.1	5.93887e-13	0.346383	0.993	0.993	1.66217e-08	5	Actg1
Rpl22l1	8.43354e-13	-0.310092	0.842	0.972	2.36038e-08	5	Rpl22l1
Reep5	8.82588e-13	0.423543	0.712	0.668	2.47019e-08	5	Reep5
S1pr5	9.50467e-13	0.504759	0.23	0.053	2.66017e-08	5	S1pr5
Crip1.2	9.52464e-13	0.397202	0.95	0.945	2.66576e-08	5	Crip1
Cd2.1	1.08362e-12	0.449276	0.698	0.623	3.03285e-08	5	Cd2
Gm10263	3.06872e-12	-0.438395	0.353	0.666	8.58874e-08	5	Gm10263
Klre1	3.38745e-12	0.374315	0.885	0.887	9.48079e-08	5	Klre1
Calm3	4.12357e-12	0.281582	0.46	0.456	1.1541e-07	5	Calm3
Dbi	4.82639e-12	0.374593	0.46	0.375	1.35081e-07	5	Dbi
Klrd1	5.34914e-12	0.417797	0.942	0.931	1.49712e-07	5	Klrd1
Selplg.1	6.44549e-12	0.40973	0.95	0.86	1.80396e-07	5	Selplg
Cst7	6.84285e-12	0.262153	0.439	0.502	1.91518e-07	5	Cst7
Borcs7.1	7.7944e-12	0.560749	0.439	0.201	2.1815e-07	5	Borcs7
Scp2	8.8467e-12	0.323693	0.583	0.565	2.47601e-07	5	Scp2
S100a6.2	1.04038e-11	0.810978	0.626	0.373	2.91181e-07	5	S100a6
Cox7a2l	1.07561e-11	-0.283215	0.763	0.948	3.01043e-07	5	Cox7a2l
Oaz1	1.16585e-11	0.292631	0.964	0.989	3.26299e-07	5	Oaz1
Ubl5	1.36506e-11	0.319363	0.806	0.805	3.82053e-07	5	Ubl5
Dynll1	1.87284e-11	0.280444	0.547	0.584	5.24169e-07	5	Dynll1
Txn1	1.90574e-11	0.3131	0.691	0.695	5.33378e-07	5	Txn1
Rps26-ps1	2.32585e-11	-0.303941	0.683	0.908	6.50958e-07	5	Rps26-ps1
Cox5b	2.40161e-11	0.318287	0.827	0.803	6.72164e-07	5	Cox5b
Pim2	2.45708e-11	-0.49671	0.122	0.4	6.87688e-07	5	Pim2
Son	2.49826e-11	0.281321	0.77	0.836	6.99213e-07	5	Son
Tmed2	2.5043e-11	0.256039	0.532	0.56	7.00903e-07	5	Tmed2
Ppp1ca	3.65329e-11	0.309539	0.835	0.82	1.02248e-06	5	Ppp1ca
Plekhj1	3.7187e-11	0.32067	0.568	0.541	1.04079e-06	5	Plekhj1
Capzb	4.317e-11	0.325237	0.777	0.791	1.20824e-06	5	Capzb
Ier2.1	4.67577e-11	0.39222	0.784	0.78	1.30865e-06	5	Ier2
Plek.2	5.20735e-11	0.505183	0.54	0.372	1.45743e-06	5	Plek
Hmgb1	5.50183e-11	0.266912	0.856	0.922	1.53985e-06	5	Hmgb1
Neat1.1	6.32658e-11	0.404877	0.561	0.513	1.77068e-06	5	Neat1
Clic1	7.0448e-11	0.288169	0.849	0.866	1.9717e-06	5	Clic1
Zyx.1	7.22217e-11	0.402437	0.647	0.569	2.02134e-06	5	Zyx
Naca	7.26957e-11	-0.255774	0.928	0.984	2.03461e-06	5	Naca
Tpst2	8.59465e-11	0.302177	0.41	0.406	2.40547e-06	5	Tpst2
Hist1h1c	8.64282e-11	0.496844	0.266	0.094	2.41895e-06	5	Hist1h1c
Selk	8.68364e-11	0.335641	0.727	0.71	2.43038e-06	5	Selk
Hnrnpa3	1.23336e-10	0.258823	0.727	0.77	3.45192e-06	5	Hnrnpa3
Pycard.1	1.32197e-10	0.366798	0.626	0.608	3.69992e-06	5	Pycard
2019-09-01	1.35415e-10	0.302936	0.719	0.748	3.79001e-06	5	2019-09-01
Dnajc15.2	1.46364e-10	0.436497	0.705	0.58	4.09645e-06	5	Dnajc15
Apbb1ip	1.51097e-10	0.408106	0.532	0.438	4.2289e-06	5	Apbb1ip
Klra9	1.79087e-10	0.672197	0.525	0.35	5.0123e-06	5	Klra9
Hist1h2bc	1.96801e-10	0.287871	0.129	0.012	5.50808e-06	5	Hist1h2bc
Tspo	2.10939e-10	0.262818	0.763	0.792	5.90375e-06	5	Tspo
Cdkn2d	2.83778e-10	0.36835	0.403	0.328	7.94239e-06	5	Cdkn2d
Ahnak.1	3.74719e-10	0.410015	0.813	0.718	1.04876e-05	5	Ahnak
Mif.2	3.88713e-10	-0.335989	0.403	0.687	1.08793e-05	5	Mif
Gm10036	4.45533e-10	-0.323611	0.741	0.915	1.24696e-05	5	Gm10036
Atox1	4.55181e-10	0.260453	0.59	0.61	1.27396e-05	5	Atox1
Ucp2.1	4.65503e-10	0.40078	0.698	0.598	1.30285e-05	5	Ucp2
Ccl3.3	5.24457e-10	0.632279	0.676	0.523	1.46785e-05	5	Ccl3
Socs3.1	5.61406e-10	-0.332518	0.237	0.508	1.57126e-05	5	Socs3
Ptpn4	5.86552e-10	0.29936	0.129	0.092	1.64164e-05	5	Ptpn4
Serpina3g	6.07741e-10	-0.414531	0.295	0.58	1.70094e-05	5	Serpina3g
Atp5k	6.20675e-10	0.262154	0.734	0.745	1.73714e-05	5	Atp5k
Bcl2	6.74627e-10	-0.401439	0.64	0.861	1.88815e-05	5	Bcl2
Rpl10-ps3	6.75842e-10	-0.255021	0.921	0.985	1.89155e-05	5	Rpl10-ps3
Mir142hg	8.17757e-10	0.400208	0.417	0.383	2.28874e-05	5	Mir142hg
Lasp1	8.92086e-10	0.314293	0.309	0.265	2.49677e-05	5	Lasp1
Rac2	9.17689e-10	0.305411	0.978	0.958	2.56843e-05	5	Rac2
Gm43647	1.06069e-09	0.430405	0.273	0.137	2.96866e-05	5	Gm43647
Pfn1.2	1.40871e-09	0.253952	1	0.998	3.94271e-05	5	Pfn1
Gm10020	1.76497e-09	-0.287025	0.504	0.765	4.9398e-05	5	Gm10020
Cd52.4	1.9669e-09	0.290981	0.993	0.984	5.50495e-05	5	Cd52
H3f3a	2.01383e-09	0.278342	0.964	0.979	5.6363e-05	5	H3f3a
Myl12a.1	2.1853e-09	0.292548	0.806	0.78	6.11621e-05	5	Myl12a
Ube2d3	2.49221e-09	0.27285	0.863	0.879	6.97521e-05	5	Ube2d3
Birc5	2.70552e-09	0.378605	0.122	0.017	7.57222e-05	5	Birc5
Ptk2b	2.85353e-09	0.25001	0.273	0.283	7.98646e-05	5	Ptk2b
Gnai2	2.85775e-09	0.274391	0.763	0.772	7.99827e-05	5	Gnai2
Flna	2.87814e-09	0.418251	0.432	0.32	8.05535e-05	5	Flna
Arhgef18	2.9099e-09	0.39222	0.288	0.159	8.14424e-05	5	Arhgef18
Sys1	3.05953e-09	0.266345	0.482	0.494	8.56301e-05	5	Sys1
Gabarapl2	3.13524e-09	0.309028	0.647	0.607	8.77492e-05	5	Gabarapl2
Fgl2	3.16411e-09	0.427982	0.266	0.134	8.8557e-05	5	Fgl2
Klra8.3	3.16492e-09	0.631221	0.662	0.554	8.85798e-05	5	Klra8
Timm44	3.2847e-09	0.264754	0.23	0.185	9.19323e-05	5	Timm44
Klf3	3.3377e-09	0.411751	0.259	0.113	9.34157e-05	5	Klf3
Srp9	3.78859e-09	0.270766	0.698	0.692	0.000106035	5	Srp9
Calm2	4.17644e-09	0.332323	0.906	0.906	0.00011689	5	Calm2
1110008P14Rik	4.56329e-09	0.358666	0.273	0.218	0.000127717	5	1110008P14Rik
Minos1	4.70839e-09	0.252919	0.662	0.664	0.000131778	5	Minos1
Emb	4.92338e-09	-0.305661	0.23	0.486	0.000137796	5	Emb
Sepp1	5.01815e-09	0.420143	0.367	0.222	0.000140448	5	Sepp1
Ccnd3.1	5.25767e-09	0.356427	0.54	0.531	0.000147152	5	Ccnd3
Oard1	5.28572e-09	0.303965	0.302	0.256	0.000147937	5	Oard1
Dcxr	5.8217e-09	0.321753	0.201	0.173	0.000162938	5	Dcxr
Arpc5	5.99534e-09	0.307539	0.712	0.691	0.000167798	5	Arpc5
Cox17	6.16754e-09	0.252883	0.691	0.736	0.000172617	5	Cox17
Ifitm10	6.31384e-09	0.361968	0.403	0.339	0.000176712	5	Ifitm10
2019-09-15	6.40903e-09	0.253791	0.64	0.626	0.000179376	5	2019-09-15
Lockd	6.63658e-09	0.326293	0.18	0.1	0.000185745	5	Lockd
Cmpk1	6.87361e-09	0.360665	0.374	0.276	0.000192379	5	Cmpk1
Bptf	7.7056e-09	0.281264	0.482	0.456	0.000215664	5	Bptf
Rala	8.43178e-09	0.257189	0.259	0.213	0.000235989	5	Rala
Lsp1	8.68412e-09	0.301494	0.576	0.559	0.000243051	5	Lsp1
Baiap3	8.99802e-09	0.367424	0.209	0.102	0.000251837	5	Baiap3
Klrb1c	9.34603e-09	0.345365	0.885	0.877	0.000261577	5	Klrb1c
Tceb2	9.51404e-09	0.279875	0.842	0.813	0.000266279	5	Tceb2
AI662270	1.00106e-08	0.288293	0.41	0.373	0.000280176	5	AI662270
Hmha1	1.02694e-08	0.312939	0.791	0.803	0.00028742	5	Hmha1
Zfp512	1.0273e-08	-0.329136	0.353	0.618	0.00028752	5	Zfp512
Anxa1	1.03873e-08	0.744824	0.288	0.212	0.00029072	5	Anxa1
Jak1.1	1.41156e-08	0.346473	0.813	0.8	0.000395069	5	Jak1
Tmem258	1.49527e-08	0.293095	0.705	0.659	0.000418495	5	Tmem258
Nrgn.1	1.79668e-08	-0.425486	0.094	0.307	0.000502854	5	Nrgn
Uqcrb	1.80352e-08	0.260894	0.64	0.632	0.00050477	5	Uqcrb
Ndufs6	1.85561e-08	0.276159	0.525	0.485	0.000519347	5	Ndufs6
Serf2	1.87947e-08	0.266899	1	0.984	0.000526025	5	Serf2
Rbbp6	1.94176e-08	0.261919	0.353	0.348	0.00054346	5	Rbbp6
Cdk2ap2	2.09146e-08	0.281137	0.554	0.524	0.000585359	5	Cdk2ap2
Rab7	2.20143e-08	0.299682	0.446	0.409	0.000616137	5	Rab7
Arl6ip5	2.66088e-08	0.362183	0.568	0.454	0.000744726	5	Arl6ip5
Zfos1	2.66808e-08	-0.348078	0.367	0.626	0.000746742	5	Zfos1
Klf13	3.16446e-08	0.321011	0.439	0.379	0.000885668	5	Klf13
Scamp3	3.27478e-08	0.279894	0.36	0.312	0.000916546	5	Scamp3
Dstn	3.57898e-08	0.400187	0.18	0.093	0.00100168	5	Dstn
Ly6e.1	3.68901e-08	-0.253189	0.604	0.827	0.00103248	5	Ly6e
Rpl7a-ps5	3.74175e-08	-0.296564	0.554	0.788	0.00104724	5	Rpl7a-ps5
Itgb1.1	3.94893e-08	0.264948	0.532	0.535	0.00110523	5	Itgb1
Dusp2	4.05843e-08	0.398284	0.345	0.282	0.00113587	5	Dusp2
Fcer1g	4.26971e-08	0.309962	1	0.991	0.00119501	5	Fcer1g
Gm8797	4.61596e-08	0.276809	0.403	0.363	0.00129192	5	Gm8797
Nptn	4.95222e-08	0.358249	0.46	0.343	0.00138603	5	Nptn
Rer1	5.18883e-08	0.315241	0.561	0.467	0.00145225	5	Rer1
Esyt1	5.36356e-08	0.374162	0.482	0.352	0.00150115	5	Esyt1
Tln1.1	5.77504e-08	0.299695	0.626	0.594	0.00161632	5	Tln1
Xrn2	6.07005e-08	0.297452	0.453	0.419	0.00169889	5	Xrn2
Azi2	6.35562e-08	0.337707	0.381	0.277	0.00177881	5	Azi2
Tma7	6.54556e-08	0.25183	0.906	0.894	0.00183197	5	Tma7
Ctsc	7.62513e-08	0.266573	0.216	0.201	0.00213412	5	Ctsc
Srp14	8.44736e-08	0.273876	0.669	0.65	0.00236425	5	Srp14
Cd7.3	8.78849e-08	-0.257359	0.468	0.706	0.00245972	5	Cd7
As3mt.1	9.06439e-08	0.452757	0.281	0.125	0.00253694	5	As3mt
Ccni	1.00428e-07	0.298297	0.403	0.334	0.00281079	5	Ccni
Mrpl23.1	1.0254e-07	-0.295772	0.302	0.549	0.00286989	5	Mrpl23
Pik3r1	1.03012e-07	0.268771	0.54	0.574	0.00288309	5	Pik3r1
Ddost	1.18379e-07	0.254503	0.331	0.304	0.00331319	5	Ddost
Mapre1	1.21152e-07	0.318949	0.432	0.352	0.0033908	5	Mapre1
Klra4.3	1.24897e-07	0.506598	0.669	0.578	0.00349562	5	Klra4
Cmtm7.1	1.31763e-07	-0.396082	0.446	0.68	0.00368779	5	Cmtm7
Dusp5	1.33245e-07	-0.3304	0.122	0.336	0.00372926	5	Dusp5
Atpif1	1.54842e-07	0.28508	0.396	0.348	0.00433371	5	Atpif1
Fam104a	1.57677e-07	0.267372	0.367	0.356	0.00441307	5	Fam104a
Adamts14	1.66299e-07	0.255905	0.266	0.229	0.00465437	5	Adamts14
Iqgap1	1.78596e-07	0.324558	0.597	0.555	0.00499855	5	Iqgap1
Rhoa	1.8142e-07	0.300661	0.748	0.707	0.00507758	5	Rhoa
Ddx52	1.99811e-07	0.332507	0.252	0.139	0.00559231	5	Ddx52
Cap1	2.39949e-07	0.286602	0.324	0.255	0.00671569	5	Cap1
Kcnab2	2.4278e-07	0.331709	0.353	0.267	0.00679491	5	Kcnab2
Wbp2	2.42946e-07	0.330909	0.367	0.311	0.00679956	5	Wbp2
Gm19585	2.46097e-07	0.317633	0.317	0.256	0.00688775	5	Gm19585
Ptbp1	2.54565e-07	0.342229	0.374	0.288	0.00712476	5	Ptbp1
Tsc22d3	2.54879e-07	0.273616	0.223	0.235	0.00713354	5	Tsc22d3
Rasgrp2.1	2.60068e-07	0.389597	0.353	0.204	0.00727879	5	Rasgrp2
Bnip3l	2.61879e-07	0.26196	0.46	0.435	0.00732946	5	Bnip3l
Aldh2	2.73319e-07	0.321011	0.158	0.065	0.00764966	5	Aldh2
Cdc42ep3	2.82474e-07	0.322554	0.367	0.303	0.00790587	5	Cdc42ep3
Ap2s1	3.32255e-07	0.25132	0.446	0.436	0.00929914	5	Ap2s1
Derl1	3.5665e-07	0.263162	0.266	0.221	0.00998191	5	Derl1
Laptm5	3.58746e-07	0.251188	0.835	0.846	0.0100406	5	Laptm5
Psma2	3.63676e-07	0.253117	0.612	0.573	0.0101786	5	Psma2
Sytl3	3.70283e-07	0.366702	0.317	0.22	0.0103635	5	Sytl3
Myo1f	3.71022e-07	0.349279	0.388	0.288	0.0103842	5	Myo1f
Actb.3	4.53465e-07	0.379682	1	0.997	0.0126916	5	Actb
Pnrc2	4.58553e-07	0.294384	0.295	0.247	0.012834	5	Pnrc2
Hn1	4.68176e-07	0.256335	0.741	0.706	0.0131033	5	Hn1
Use1	5.11122e-07	-0.27665	0.54	0.759	0.0143053	5	Use1
Dek	5.2543e-07	0.293461	0.489	0.462	0.0147057	5	Dek
Abracl.1	6.07818e-07	0.270337	0.698	0.66	0.0170116	5	Abracl
Atp1b3	6.21581e-07	0.291123	0.504	0.458	0.0173968	5	Atp1b3
Fam103a1	6.61015e-07	0.283372	0.482	0.409	0.0185005	5	Fam103a1
Ywhab	7.34926e-07	0.30551	0.547	0.476	0.0205691	5	Ywhab
S1pr4.1	7.75406e-07	0.347752	0.388	0.286	0.0217021	5	S1pr4
B3gnt5	7.88398e-07	0.286454	0.165	0.06	0.0220657	5	B3gnt5
PISD	8.15156e-07	0.320677	0.518	0.499	0.0228146	5	PISD
Smarca4	8.45211e-07	0.256536	0.173	0.128	0.0236558	5	Smarca4
Tmem234	9.06443e-07	0.259232	0.647	0.631	0.0253695	5	Tmem234
Id2	9.07768e-07	0.439928	0.899	0.848	0.0254066	5	Id2
Gnptg	9.08143e-07	0.306837	0.281	0.187	0.0254171	5	Gnptg
Srp54b	9.38662e-07	0.308281	0.345	0.244	0.0262713	5	Srp54b
Vimp	1.08491e-06	0.305722	0.345	0.274	0.0303645	5	Vimp
Rhoc	1.1408e-06	0.258502	0.151	0.09	0.0319288	5	Rhoc
Lck.3	1.21252e-06	0.281058	0.748	0.743	0.0339359	5	Lck
Ncr1	1.24254e-06	0.344462	0.77	0.683	0.0347763	5	Ncr1
Arhgef2	1.26562e-06	0.283574	0.331	0.251	0.0354223	5	Arhgef2
Gpc1	1.28324e-06	0.312826	0.158	0.048	0.0359154	5	Gpc1
Prkcb	1.28659e-06	0.270028	0.252	0.232	0.036009	5	Prkcb
Klrc2	1.30384e-06	0.303755	0.691	0.645	0.0364919	5	Klrc2
Ikzf2.2	1.30637e-06	-0.386014	0.115	0.309	0.0365626	5	Ikzf2
Col4a3bp	1.50777e-06	0.252286	0.151	0.068	0.0421996	5	Col4a3bp
Pitpnc1	1.78281e-06	0.254273	0.374	0.34	0.0498973	5	Pitpnc1
Rps15a.1	2.76592e-37	0.317941	1	0.999	7.74127e-33	6	Rps15a
Rpl12.2	5.29123e-31	0.357747	1	0.997	1.48091e-26	6	Rpl12
Rpl17.1	2.015e-30	0.262206	1	1	5.63959e-26	6	Rpl17
Rps18.1	6.28585e-30	0.301652	1	0.999	1.75928e-25	6	Rps18
Rpl13.1	3.24174e-29	0.256868	1	0.999	9.07297e-25	6	Rpl13
Rpsa.1	4.67991e-29	0.29543	1	0.999	1.30981e-24	6	Rpsa
Rpl18a.1	5.06937e-29	0.252017	1	0.999	1.41882e-24	6	Rpl18a
Rps7.1	6.74755e-28	0.255781	1	1	1.88851e-23	6	Rps7
Rps18-ps3.1	1.56715e-27	0.367302	0.992	0.929	4.38615e-23	6	Rps18-ps3
Rplp0.1	3.03857e-26	0.303344	1	0.998	8.50436e-22	6	Rplp0
Rps20.2	6.46252e-26	0.302096	1	0.999	1.80873e-21	6	Rps20
Rpl4.1	7.33695e-26	0.259111	1	0.999	2.05347e-21	6	Rpl4
Rps6.1	3.4369e-25	0.257398	1	0.999	9.6192e-21	6	Rps6
Wdr89.2	4.8496e-25	0.306138	1	0.995	1.35731e-20	6	Wdr89
Rps28.2	7.21315e-25	0.28249	1	0.998	2.01882e-20	6	Rps28
Rps19.2	2.38715e-24	0.28039	1	0.999	6.68116e-20	6	Rps19
Rpl3.1	3.83107e-24	0.264698	1	0.999	1.07224e-19	6	Rpl3
Tmsb4x.5	6.1661e-23	-0.557587	1	1	1.72577e-18	6	Tmsb4x
Rps27rt.2	1.88566e-22	0.258521	1	0.999	5.27759e-18	6	Rps27rt
H2afz.2	5.26464e-22	-0.51698	0.992	0.974	1.47347e-17	6	H2afz
Rpl10a.1	1.0496e-21	0.272477	0.996	0.996	2.93761e-17	6	Rpl10a
Gm9493.1	1.45185e-21	0.266782	1	0.995	4.06345e-17	6	Gm9493
Lck.4	3.71301e-20	-0.470329	0.665	0.757	1.0392e-15	6	Lck
Gm8730.1	2.20395e-19	0.281686	1	0.988	6.16842e-15	6	Gm8730
Cox6a1	3.55297e-19	-0.317469	0.818	0.809	9.94405e-15	6	Cox6a1
Rpl36a.2	5.79287e-19	0.26061	0.992	0.994	1.62131e-14	6	Rpl36a
Ndufa1	8.03766e-19	-0.299009	0.665	0.66	2.24958e-14	6	Ndufa1
Gm6133.1	8.50388e-19	0.30697	0.983	0.913	2.38007e-14	6	Gm6133
Pfn1.3	3.08398e-18	-0.411471	1	0.998	8.63145e-14	6	Pfn1
Ccr2.3	4.89644e-18	-0.530927	0.488	0.575	1.37042e-13	6	Ccr2
Shfm1.1	1.13877e-17	-0.263069	0.872	0.827	3.18719e-13	6	Shfm1
Gzma.4	1.90034e-17	-1.01619	0.756	0.772	5.31867e-13	6	Gzma
S100a8.4	3.31436e-17	-1.70897	0.376	0.137	9.27622e-13	6	S100a8
AW112010.3	3.41569e-17	-0.514135	0.975	0.986	9.55982e-13	6	AW112010
S100a6.3	4.00187e-17	-0.910539	0.219	0.424	1.12004e-12	6	S100a6
Epsti1.4	4.45851e-17	-0.453685	0.55	0.619	1.24785e-12	6	Epsti1
Eef1g.1	6.29908e-17	0.273407	0.983	0.95	1.76299e-12	6	Eef1g
Dnajc15.3	1.03017e-16	-0.426564	0.512	0.604	2.88324e-12	6	Dnajc15
Rpl13-ps3.1	2.44692e-16	0.258997	0.988	0.955	6.84845e-12	6	Rpl13-ps3
Atp5k.1	2.5748e-16	-0.300145	0.736	0.745	7.20635e-12	6	Atp5k
Id2.1	4.13237e-16	-0.462587	0.855	0.852	1.15657e-11	6	Id2
Arhgdib.2	6.78847e-16	-0.312851	0.917	0.907	1.89996e-11	6	Arhgdib
Tceb2.1	9.41997e-16	-0.289643	0.806	0.817	2.63646e-11	6	Tceb2
Fxyd5.1	1.24457e-15	-0.319657	0.93	0.927	3.4833e-11	6	Fxyd5
Ptprc.3	1.28801e-15	-0.378325	0.909	0.921	3.60489e-11	6	Ptprc
Cd52.5	2.20433e-15	-0.441538	0.992	0.983	6.16947e-11	6	Cd52
Actg1.2	3.94952e-15	-0.358131	0.996	0.992	1.10539e-10	6	Actg1
Vim.4	4.95081e-15	-0.383442	0.769	0.735	1.38563e-10	6	Vim
Capzb.1	1.03526e-14	-0.2719	0.81	0.786	2.8975e-10	6	Capzb
Ncr1.1	1.04022e-14	-0.432456	0.632	0.7	2.91136e-10	6	Ncr1
Ucp2.2	1.12289e-14	-0.3734	0.554	0.616	3.14273e-10	6	Ucp2
Ndufa4.1	1.17187e-14	-0.283929	0.802	0.797	3.27983e-10	6	Ndufa4
Ctla2a.3	1.33995e-14	-0.395452	0.69	0.673	3.75026e-10	6	Ctla2a
Psma2.1	1.34113e-14	-0.25503	0.579	0.575	3.75356e-10	6	Psma2
Rps26-ps1.1	1.52422e-14	0.286382	0.971	0.875	4.26599e-10	6	Rps26-ps1
Cox5b.1	4.6205e-14	-0.290824	0.789	0.808	1.29318e-09	6	Cox5b
Tmsb10.1	4.82446e-14	-0.289326	1	0.999	1.35027e-09	6	Tmsb10
Irf8.4	4.97137e-14	-0.355664	0.529	0.477	1.39139e-09	6	Irf8
Abracl.2	9.21873e-14	-0.290977	0.645	0.666	2.58014e-09	6	Abracl
Zyx.2	9.70888e-14	-0.33958	0.562	0.578	2.71732e-09	6	Zyx
Hmgb2.2	1.03671e-13	-0.397593	0.773	0.756	2.90155e-09	6	Hmgb2
Itgb2.1	1.1087e-13	-0.451491	0.36	0.512	3.10303e-09	6	Itgb2
Ahnak.2	1.60481e-13	-0.412523	0.661	0.737	4.49156e-09	6	Ahnak
Uqcr10	2.12966e-13	-0.257811	0.669	0.675	5.96049e-09	6	Uqcr10
Spcs1	2.71354e-13	-0.277234	0.393	0.44	7.59464e-09	6	Spcs1
Myl6.2	3.76171e-13	-0.332211	0.967	0.96	1.05283e-08	6	Myl6
Coro1a.2	3.96502e-13	-0.280066	0.955	0.915	1.10973e-08	6	Coro1a
Tyrobp.3	4.848e-13	-0.389564	1	0.986	1.35686e-08	6	Tyrobp
Lsp1.1	6.43854e-13	-0.293589	0.541	0.564	1.80202e-08	6	Lsp1
Sh3bgrl3	7.01286e-13	-0.296787	0.996	0.989	1.96276e-08	6	Sh3bgrl3
Cotl1.2	8.72884e-13	-0.332048	0.587	0.616	2.44303e-08	6	Cotl1
Cox6b1	1.64504e-12	-0.28497	0.86	0.88	4.60414e-08	6	Cox6b1
Cfl1.2	2.40022e-12	-0.318788	0.975	0.965	6.71775e-08	6	Cfl1
Rac2.1	3.57632e-12	-0.265112	0.971	0.958	1.00094e-07	6	Rac2
Sdcbp.1	3.79159e-12	-0.260688	0.401	0.421	1.06119e-07	6	Sdcbp
Laptm5.1	4.57281e-12	-0.259256	0.843	0.845	1.27984e-07	6	Laptm5
Arsb.1	6.21054e-12	-0.372247	0.19	0.325	1.73821e-07	6	Arsb
Calm1.1	6.99831e-12	-0.288704	0.864	0.863	1.95869e-07	6	Calm1
Atp5j2	7.84355e-12	-0.262889	0.843	0.858	2.19525e-07	6	Atp5j2
Ccnd3.2	8.04577e-12	-0.312186	0.492	0.539	2.25185e-07	6	Ccnd3
Tpm3.1	8.29658e-12	-0.318714	0.748	0.781	2.32205e-07	6	Tpm3
Tln1.2	9.98788e-12	-0.280407	0.562	0.603	2.79541e-07	6	Tln1
S100a9.5	1.36691e-11	-1.52409	0.376	0.183	3.82572e-07	6	S100a9
Ndufa3	1.37148e-11	-0.262083	0.764	0.769	3.83849e-07	6	Ndufa3
Gmfg.1	1.43685e-11	-0.251133	0.752	0.723	4.02145e-07	6	Gmfg
Ms4a4b.1	2.09627e-11	-0.334616	0.888	0.901	5.86705e-07	6	Ms4a4b
Crip1.3	2.91605e-11	-0.387696	0.95	0.944	8.16145e-07	6	Crip1
Jak1.2	3.10118e-11	-0.262754	0.806	0.8	8.67959e-07	6	Jak1
Oaz1.1	3.60732e-11	-0.260604	0.992	0.986	1.00962e-06	6	Oaz1
Myo1f.1	3.64588e-11	-0.269876	0.248	0.304	1.02041e-06	6	Myo1f
Myl12a.2	4.38008e-11	-0.275727	0.769	0.785	1.2259e-06	6	Myl12a
Mapre1.1	5.86577e-11	-0.278512	0.306	0.368	1.64171e-06	6	Mapre1
Arl6ip5.1	6.33239e-11	-0.25838	0.438	0.469	1.77231e-06	6	Arl6ip5
Uqcrb.1	6.7282e-11	-0.257435	0.603	0.638	1.88309e-06	6	Uqcrb
Anxa2.2	7.02335e-11	-0.272856	0.814	0.795	1.9657e-06	6	Anxa2
Btg2	7.83767e-11	-0.348373	0.711	0.753	2.19361e-06	6	Btg2
Adgre5.1	9.461e-11	-0.271646	0.471	0.491	2.64794e-06	6	Adgre5
Ets1	9.48523e-11	-0.271601	0.587	0.613	2.65473e-06	6	Ets1
Emp3.1	1.26823e-10	-0.358616	0.562	0.643	3.54953e-06	6	Emp3
Atp6v0e	1.47858e-10	-0.251067	0.636	0.651	4.13825e-06	6	Atp6v0e
Lgals1.4	3.35926e-10	-0.475243	0.884	0.904	9.4019e-06	6	Lgals1
Cnn2.1	5.17523e-10	-0.264362	0.715	0.722	1.44844e-05	6	Cnn2
Cyba.2	5.25131e-10	-0.263829	0.893	0.89	1.46974e-05	6	Cyba
Uqcrq.1	6.95899e-10	-0.261712	0.607	0.653	1.94768e-05	6	Uqcrq
Ctsd.1	8.30664e-10	-0.283333	0.822	0.844	2.32486e-05	6	Ctsd
Rhoa.1	8.88505e-10	-0.276287	0.682	0.715	2.48675e-05	6	Rhoa
Tpm4.1	9.71384e-10	-0.293865	0.517	0.573	2.71871e-05	6	Tpm4
Actb.4	1.18608e-09	-0.351583	1	0.997	3.31959e-05	6	Actb
Cd7.4	1.21354e-09	-0.289879	0.694	0.684	3.39646e-05	6	Cd7
Rap1b.1	1.31643e-09	-0.335011	0.306	0.402	3.68444e-05	6	Rap1b
Dok2.2	1.56926e-09	-0.287571	0.512	0.561	4.39205e-05	6	Dok2
Ost4	1.61487e-09	-0.250385	0.764	0.793	4.5197e-05	6	Ost4
Borcs7.2	2.14776e-09	-0.382102	0.103	0.241	6.01114e-05	6	Borcs7
S100a10.2	2.46145e-09	-0.287282	0.917	0.926	6.88911e-05	6	S100a10
Serf2.1	3.11714e-09	-0.252806	0.967	0.988	8.72424e-05	6	Serf2
Tceb1	3.66805e-09	-0.252451	0.322	0.384	0.000102661	6	Tceb1
Bin2.2	6.48399e-09	-0.300262	0.558	0.64	0.000181474	6	Bin2
Slfn2.1	7.01884e-09	-0.347044	0.236	0.316	0.000196443	6	Slfn2
Il18r1	8.58528e-09	-0.261647	0.438	0.474	0.000240285	6	Il18r1
Cd2.2	9.99599e-09	-0.283825	0.591	0.636	0.000279768	6	Cd2
Tpst2.1	1.00183e-08	-0.268667	0.339	0.418	0.000280392	6	Tpst2
Hcls1.1	1.46659e-08	-0.287318	0.306	0.405	0.00041047	6	Hcls1
Ly6c2.2	3.33012e-08	-0.850535	0.054	0.148	0.000932035	6	Ly6c2
Fam189b.1	4.73846e-08	-0.255481	0.364	0.399	0.0013262	6	Fam189b
Rasgrp2.2	4.83513e-08	-0.280774	0.145	0.229	0.00135326	6	Rasgrp2
Thy1.3	5.38454e-08	-0.365797	0.331	0.406	0.00150703	6	Thy1
Spn.1	6.12726e-08	-0.356669	0.293	0.392	0.0017149	6	Spn
S100a4	6.18101e-08	-0.418673	0.021	0.125	0.00172994	6	S100a4
Srgn	6.97235e-08	-0.265823	0.76	0.793	0.00195142	6	Srgn
BC031181	1.00973e-07	-0.259073	0.256	0.343	0.00282604	6	BC031181
Il18rap.1	1.62041e-07	-0.267233	0.364	0.422	0.00453522	6	Il18rap
Qrfp.2	3.31506e-07	-0.255267	0.157	0.234	0.00927819	6	Qrfp
Anxa1.1	6.62863e-07	-0.389612	0.116	0.236	0.0185522	6	Anxa1
Sike1.2	7.70146e-07	-0.263473	0.128	0.234	0.0215548	6	Sike1
Ankrd11.1	1.00143e-06	-0.265473	0.417	0.498	0.028028	6	Ankrd11
S1pr4.2	1.11524e-06	-0.27112	0.223	0.306	0.0312132	6	S1pr4
Plek.3	1.35072e-06	-0.299387	0.322	0.397	0.037804	6	Plek
Tmsb4x.6	2.87956e-203	-1.08529	1	1	8.05932e-199	7	Tmsb4x
Cd52.6	1.78684e-151	-1.01134	0.947	0.996	5.001e-147	7	Cd52
Ftl1.4	3.71322e-121	0.687457	1	0.988	1.03926e-116	7	Ftl1
Tmsb10.2	6.81174e-112	-0.583636	1	0.999	1.90647e-107	7	Tmsb10
Pfn1.4	8.7756e-109	-0.696594	0.992	1	2.45611e-104	7	Pfn1
Ccr2.4	9.248e-91	-1.23159	0.155	0.69	2.58833e-86	7	Ccr2
Gzma.5	1.19004e-84	-1.95117	0.51	0.851	3.33068e-80	7	Gzma
Rps27rt.3	4.95028e-83	0.434068	1	0.999	1.38548e-78	7	Rps27rt
Rps24.1	3.02195e-70	0.314522	1	1	8.45784e-66	7	Rps24
Rps28.3	1.521e-69	0.390018	1	0.998	4.25697e-65	7	Rps28
Crip1.4	2.94199e-67	-0.731583	0.865	0.97	8.23404e-63	7	Crip1
Rpl12.3	3.24497e-67	0.44349	1	0.997	9.08202e-63	7	Rpl12
Id2.2	1.42101e-66	-0.951916	0.662	0.912	3.97713e-62	7	Id2
Tyrobp.4	2.07602e-66	-0.71018	0.982	0.99	5.81035e-62	7	Tyrobp
Ctla2a.4	6.84208e-66	-1.04297	0.371	0.771	1.91496e-61	7	Ctla2a
AW112010.4	1.4249e-65	-0.79527	0.964	0.99	3.988e-61	7	AW112010
Wdr89.3	1.45564e-65	0.424084	1	0.994	4.07403e-61	7	Wdr89
Rps27.1	2.59431e-64	0.272425	1	1	7.26095e-60	7	Rps27
Serf2.2	4.14165e-60	-0.485734	0.967	0.99	1.15917e-55	7	Serf2
Rplp2.1	1.07794e-58	0.287492	1	1	3.01693e-54	7	Rplp2
Hcst.1	5.32905e-57	-0.664294	0.772	0.948	1.49149e-52	7	Hcst
Actg1.3	5.29181e-52	-0.521171	0.985	0.995	1.48107e-47	7	Actg1
Rps15.1	3.872e-51	0.283551	1	0.999	1.08369e-46	7	Rps15
Rpl18a.2	3.94294e-49	0.265142	1	0.999	1.10355e-44	7	Rpl18a
Mt1.5	9.15727e-48	0.818755	0.31	0.044	2.56294e-43	7	Mt1
Rpl30.1	1.43375e-47	0.267059	1	0.998	4.01278e-43	7	Rpl30
Ccl5.2	2.51972e-47	-0.710187	0.997	0.998	7.05219e-43	7	Ccl5
Sh3bgrl3.1	1.96959e-46	-0.471607	0.975	0.995	5.51249e-42	7	Sh3bgrl3
H2afz.3	2.5415e-46	-0.678985	0.939	0.988	7.11316e-42	7	H2afz
Rpl17.2	4.19189e-45	0.258699	1	1	1.17323e-40	7	Rpl17
Ncr1.2	6.92187e-44	-0.74204	0.452	0.764	1.93729e-39	7	Ncr1
Epsti1.5	1.70419e-43	-0.758785	0.35	0.689	4.76969e-39	7	Epsti1
Cfl1.3	2.61222e-43	-0.47683	0.924	0.98	7.31109e-39	7	Cfl1
Rps19.3	4.44958e-43	0.31805	1	0.999	1.24535e-38	7	Rps19
Sub1.1	1.54336e-42	-0.48202	0.893	0.973	4.31957e-38	7	Sub1
Coro1a.3	1.1861e-40	-0.498518	0.83	0.949	3.31966e-36	7	Coro1a
Rpl5.1	2.5534e-40	0.282822	1	0.996	7.14646e-36	7	Rpl5
Rps5.1	3.66649e-40	0.27267	1	0.998	1.02618e-35	7	Rps5
Ptprc.4	7.17301e-40	-0.586208	0.835	0.945	2.00758e-35	7	Ptprc
Actb.5	2.01849e-39	-0.702354	0.99	1	5.64936e-35	7	Actb
Myl6.3	2.28333e-38	-0.49456	0.901	0.979	6.39058e-34	7	Myl6
S100a6.4	7.77695e-38	-1.03701	0.135	0.475	2.17661e-33	7	S100a6
Oaz1.2	8.77815e-38	-0.390637	0.982	0.988	2.45683e-33	7	Oaz1
Zyx.3	1.75918e-36	-0.643894	0.32	0.656	4.9236e-32	7	Zyx
Gstm1.3	3.20365e-35	0.5743	0.485	0.179	8.96639e-31	7	Gstm1
Cotl1.3	9.3325e-35	-0.639441	0.381	0.684	2.61198e-30	7	Cotl1
Rpl36a.3	1.12074e-34	0.30735	1	0.991	3.13673e-30	7	Rpl36a
Cox6c	4.23054e-34	-0.438365	0.805	0.929	1.18404e-29	7	Cox6c
Thy1.4	9.49357e-34	-0.755723	0.155	0.469	2.65706e-29	7	Thy1
Cmtm7.2	1.0345e-33	0.522478	0.827	0.608	2.89535e-29	7	Cmtm7
Ptpn18	1.95873e-33	-0.338829	0.98	0.985	5.48208e-29	7	Ptpn18
Itgb2.2	6.4226e-33	-0.617998	0.244	0.567	1.79756e-28	7	Itgb2
Arhgdib.3	1.67084e-32	-0.475496	0.832	0.933	4.67633e-28	7	Arhgdib
Rps9.1	1.89406e-32	0.254831	1	0.997	5.30111e-28	7	Rps9
Chchd10.3	4.74207e-32	0.670475	0.299	0.091	1.32721e-27	7	Chchd10
Lck.5	8.1528e-32	-0.582926	0.563	0.8	2.28181e-27	7	Lck
Irf8.5	4.06162e-30	-0.736877	0.251	0.557	1.13677e-25	7	Irf8
Rac2.2	1.43633e-29	-0.381542	0.921	0.971	4.01999e-25	7	Rac2
Atp5e	4.82662e-29	-0.362716	0.919	0.976	1.35087e-24	7	Atp5e
Ucp2.3	6.04752e-29	-0.556635	0.393	0.673	1.69258e-24	7	Ucp2
Dnajc15.4	2.91871e-28	-0.592895	0.373	0.659	8.16889e-24	7	Dnajc15
S100a13.1	5.14241e-28	-0.552043	0.398	0.664	1.43926e-23	7	S100a13
Gm6133.2	5.48097e-28	0.343783	0.98	0.906	1.53401e-23	7	Gm6133
Ahnak.3	2.88929e-27	-0.518215	0.53	0.787	8.08655e-23	7	Ahnak
Vps37b.2	6.84636e-27	0.488729	0.794	0.589	1.91616e-22	7	Vps37b
Gm10116.1	1.34391e-26	0.461598	0.652	0.403	3.76135e-22	7	Gm10116
Ikzf2.3	2.28052e-26	0.5335	0.497	0.228	6.38272e-22	7	Ikzf2
Jak1.3	2.94891e-26	-0.493062	0.65	0.849	8.25342e-22	7	Jak1
Arpc2.1	4.18397e-26	-0.395558	0.906	0.957	1.17101e-21	7	Arpc2
Ctla2b.2	5.06805e-26	-0.508466	0.183	0.47	1.41845e-21	7	Ctla2b
Arpc1b.1	8.76558e-26	-0.370457	0.883	0.971	2.45331e-21	7	Arpc1b
Lgals1.5	1.15664e-25	-0.59709	0.858	0.914	3.23721e-21	7	Lgals1
Limd2	9.46405e-25	-0.392541	0.84	0.918	2.6488e-20	7	Limd2
Pglyrp1.1	2.52618e-24	-0.505735	0.259	0.546	7.07027e-20	7	Pglyrp1
Sult2b1	8.31999e-24	0.358921	0.206	0.045	2.3286e-19	7	Sult2b1
Gimap5	1.01613e-23	-0.413986	0.711	0.856	2.84394e-19	7	Gimap5
Plek.4	9.73727e-23	-0.520571	0.183	0.45	2.72527e-18	7	Plek
Dok2.3	1.02881e-22	-0.498344	0.348	0.619	2.87944e-18	7	Dok2
Xist	2.55074e-22	0.322565	0.967	0.911	7.13902e-18	7	Xist
S100a9.6	3.61187e-22	-1.40561	0.398	0.153	1.01089e-17	7	S100a9
Ccnd3.3	6.77768e-22	-0.511092	0.332	0.594	1.89694e-17	7	Ccnd3
Itgax.1	8.40882e-22	-0.418234	0.033	0.221	2.35346e-17	7	Itgax
Il2rb.1	1.20151e-21	-0.451649	0.602	0.768	3.36278e-17	7	Il2rb
Uba52.1	1.50888e-21	0.257892	0.992	0.977	4.22305e-17	7	Uba52
Clec2i.1	4.0083e-21	0.390927	0.477	0.219	1.12184e-16	7	Clec2i
Lgals3.2	5.07507e-21	0.587166	0.383	0.2	1.42041e-16	7	Lgals3
S100a10.3	8.7035e-21	-0.396561	0.886	0.937	2.43594e-16	7	S100a10
Sec61b	1.77109e-20	-0.374343	0.678	0.841	4.95692e-16	7	Sec61b
Shisa5	2.02151e-20	-0.314396	0.942	0.971	5.65779e-16	7	Shisa5
Rps18-ps3.2	2.48862e-20	0.286315	0.982	0.924	6.96516e-16	7	Rps18-ps3
Khdc1a.4	6.03926e-20	-0.561685	0.033	0.21	1.69027e-15	7	Khdc1a
Vasp.1	6.28823e-20	-0.412163	0.617	0.807	1.75995e-15	7	Vasp
Ctsw	6.83887e-20	-0.398564	0.731	0.866	1.91406e-15	7	Ctsw
Tma7.1	1.19335e-19	-0.339797	0.799	0.925	3.33995e-15	7	Tma7
Klhdc2	2.09092e-19	0.406424	0.492	0.269	5.85206e-15	7	Klhdc2
Mrpl33.1	2.20977e-19	-0.403353	0.421	0.67	6.1847e-15	7	Mrpl33
Ppp1r18.1	2.67805e-19	-0.417138	0.312	0.565	7.49534e-15	7	Ppp1r18
Itgal.2	2.68605e-19	-0.447373	0.31	0.556	7.51771e-15	7	Itgal
Slc37a2	4.17494e-19	0.330043	0.173	0.038	1.16848e-14	7	Slc37a2
Capzb.2	4.42412e-19	-0.38468	0.657	0.831	1.23822e-14	7	Capzb
Sell.1	1.41316e-18	-0.430632	0.48	0.707	3.95515e-14	7	Sell
Itgam.1	1.70792e-18	-0.296504	0.003	0.122	4.78012e-14	7	Itgam
Cyba.3	2.20979e-18	-0.377401	0.812	0.914	6.18477e-14	7	Cyba
Ptprcap	2.70102e-18	-0.313035	0.868	0.932	7.55961e-14	7	Ptprcap
Ms4a4b.2	3.60402e-18	-0.382451	0.832	0.92	1.00869e-13	7	Ms4a4b
BC035044	5.74517e-18	-0.304067	0.033	0.197	1.60796e-13	7	BC035044
Ppm1j	6.61657e-18	-0.312222	0.023	0.176	1.85184e-13	7	Ppm1j
Ly6c2.3	7.05301e-18	-1.02905	0.028	0.167	1.974e-13	7	Ly6c2
P2rx4	7.10468e-18	0.284089	0.228	0.062	1.98846e-13	7	P2rx4
Arl4c.2	1.31768e-17	-0.388348	0.066	0.25	3.68792e-13	7	Arl4c
Cnn2.2	2.54345e-17	-0.409856	0.579	0.765	7.1186e-13	7	Cnn2
Arpc5.1	2.7408e-17	-0.393391	0.541	0.74	7.67095e-13	7	Arpc5
Fxyd5.2	2.74164e-17	-0.338222	0.883	0.941	7.67331e-13	7	Fxyd5
Klra7.3	9.89769e-17	-0.55642	0.566	0.71	2.77016e-12	7	Klra7
Sp100.1	1.29583e-16	-0.402007	0.355	0.588	3.62677e-12	7	Sp100
Malt1	1.5903e-16	0.350386	0.332	0.151	4.45094e-12	7	Malt1
Atp5h	2.10098e-16	-0.307	0.873	0.93	5.88021e-12	7	Atp5h
Cmah.1	2.35466e-16	-0.265663	0.01	0.136	6.59023e-12	7	Cmah
Ndufa4.2	2.63006e-16	-0.347191	0.683	0.833	7.36102e-12	7	Ndufa4
Selplg.2	3.17557e-16	-0.350832	0.766	0.899	8.88779e-12	7	Selplg
H2afj	3.99466e-16	-0.354678	0.673	0.821	1.11803e-11	7	H2afj
Spn.2	5.3193e-16	-0.429502	0.206	0.431	1.48877e-11	7	Spn
Arsb.2	5.46476e-16	-0.384968	0.147	0.354	1.52948e-11	7	Arsb
Ndufa1.1	7.03267e-16	-0.362437	0.503	0.711	1.9683e-11	7	Ndufa1
Arhgef1.2	8.59197e-16	-0.429418	0.49	0.67	2.40472e-11	7	Arhgef1
Arpc5l	1.04822e-15	-0.365322	0.282	0.511	2.93374e-11	7	Arpc5l
Klra4.4	1.12278e-15	-0.531452	0.576	0.589	3.14244e-11	7	Klra4
Samd3.1	1.14475e-15	-0.40548	0.234	0.452	3.20392e-11	7	Samd3
Lsp1.2	1.29302e-15	-0.397093	0.401	0.611	3.61889e-11	7	Lsp1
Myh9.1	2.2781e-15	-0.387769	0.259	0.485	6.37593e-11	7	Myh9
Tln1.3	2.60426e-15	-0.390476	0.437	0.647	7.28879e-11	7	Tln1
Cd63	2.68728e-15	0.250245	0.127	0.019	7.52117e-11	7	Cd63
Gimap4	2.86086e-15	-0.329	0.769	0.884	8.00699e-11	7	Gimap4
Uqcrq.2	2.98421e-15	-0.365682	0.503	0.692	8.35222e-11	7	Uqcrq
Dock2.1	3.01481e-15	-0.408025	0.353	0.565	8.43784e-11	7	Dock2
S100a4.1	3.33882e-15	-0.481275	0.015	0.14	9.3447e-11	7	S100a4
Nrgn.2	3.35322e-15	0.36606	0.447	0.24	9.38499e-11	7	Nrgn
Abracl.3	3.94814e-15	-0.361412	0.505	0.712	1.105e-10	7	Abracl
Evl.1	5.85995e-15	-0.363751	0.503	0.701	1.64008e-10	7	Evl
Ccr5.1	1.04829e-14	-0.363767	0.104	0.289	2.93396e-10	7	Ccr5
Sept1.1	1.16032e-14	-0.36558	0.629	0.782	3.24751e-10	7	2019-09-01
Gm9844	1.20938e-14	-0.367678	0.424	0.632	3.3848e-10	7	Gm9844
Socs3.2	1.61459e-14	0.361678	0.614	0.445	4.51891e-10	7	Socs3
Tm6sf1.1	1.69611e-14	-0.405544	0.241	0.447	4.74707e-10	7	Tm6sf1
Calm1.2	1.95673e-14	-0.330777	0.782	0.889	5.47649e-10	7	Calm1
Sema4a	2.19467e-14	-0.35932	0.216	0.427	6.14245e-10	7	Sema4a
Borcs7.3	4.83281e-14	-0.383294	0.091	0.261	1.35261e-09	7	Borcs7
Tuba1b.1	4.89419e-14	0.320622	0.579	0.4	1.36979e-09	7	Tuba1b
Mgst2	5.91159e-14	0.326814	0.36	0.217	1.65454e-09	7	Mgst2
Chsy1	6.02086e-14	-0.354221	0.206	0.41	1.68512e-09	7	Chsy1
Actr3	9.30957e-14	-0.321324	0.68	0.816	2.60556e-09	7	Actr3
Rasgrp2.3	1.03216e-13	-0.31621	0.086	0.257	2.88881e-09	7	Rasgrp2
Styk1.1	1.16254e-13	-0.303453	0.036	0.17	3.25372e-09	7	Styk1
Atp5j2.1	1.495e-13	-0.28156	0.805	0.872	4.18422e-09	7	Atp5j2
Junb	1.5387e-13	0.327551	0.97	0.958	4.30652e-09	7	Junb
Gramd3	1.85318e-13	0.325904	0.274	0.127	5.18668e-09	7	Gramd3
Hsd11b1.1	1.93722e-13	-0.386939	0.15	0.338	5.42189e-09	7	Hsd11b1
Tpm4.2	2.15357e-13	-0.378455	0.419	0.611	6.02741e-09	7	Tpm4
Sh2d2a.1	2.46483e-13	-0.367321	0.36	0.574	6.89856e-09	7	Sh2d2a
Anxa6	3.69866e-13	-0.32884	0.401	0.613	1.03518e-08	7	Anxa6
Ugcg	3.78661e-13	-0.348653	0.505	0.695	1.0598e-08	7	Ugcg
Sepp1.2	4.52909e-13	-0.334775	0.104	0.275	1.2676e-08	7	Sepp1
Gm10263.1	4.66918e-13	0.298432	0.736	0.61	1.30681e-08	7	Gm10263
Stat4	4.81017e-13	-0.332559	0.218	0.419	1.34627e-08	7	Stat4
Spry2	5.63553e-13	-0.482623	0.16	0.346	1.57727e-08	7	Spry2
Flna.1	5.96454e-13	-0.3511	0.183	0.375	1.66936e-08	7	Flna
Pycard.2	6.9534e-13	-0.38298	0.497	0.645	1.94612e-08	7	Pycard
Cd3d.2	7.97253e-13	-0.358886	0.02	0.136	2.23135e-08	7	Cd3d
Myl12a.3	9.02203e-13	-0.332773	0.69	0.811	2.52509e-08	7	Myl12a
Higd1a	1.10206e-12	-0.331035	0.266	0.466	3.08444e-08	7	Higd1a
Gpsm3	1.19609e-12	-0.297764	0.558	0.744	3.34763e-08	7	Gpsm3
Pik3ip1	1.37023e-12	0.276737	0.221	0.081	3.835e-08	7	Pik3ip1
Nkg7.2	1.62204e-12	-0.27051	0.992	0.99	4.53976e-08	7	Nkg7
Ets1.1	1.67336e-12	-0.353396	0.462	0.655	4.6834e-08	7	Ets1
Lcp1.1	2.04807e-12	-0.364451	0.548	0.699	5.73213e-08	7	Lcp1
S100a11.1	2.42424e-12	-0.325112	0.782	0.871	6.78497e-08	7	S100a11
Bin2.3	2.57449e-12	-0.367527	0.5	0.669	7.20549e-08	7	Bin2
Anxa1.2	2.65748e-12	-0.439822	0.104	0.254	7.43776e-08	7	Anxa1
Ubl5.1	2.78988e-12	-0.278319	0.749	0.822	7.80831e-08	7	Ubl5
Ndufs6.1	3.20877e-12	-0.344556	0.355	0.53	8.98072e-08	7	Ndufs6
Cd37	3.76038e-12	-0.337081	0.475	0.638	1.05245e-07	7	Cd37
Shfm1.2	3.76832e-12	-0.284181	0.741	0.862	1.05468e-07	7	Shfm1
Il18rap.2	3.79448e-12	-0.364631	0.264	0.46	1.062e-07	7	Il18rap
Eomes.2	4.00308e-12	-0.381754	0.348	0.539	1.12038e-07	7	Eomes
Klra8.5	5.15606e-12	-0.655411	0.48	0.589	1.44308e-07	7	Klra8
Fndc4	5.43033e-12	0.251478	0.142	0.036	1.51984e-07	7	Fndc4
Trf	9.32328e-12	0.284441	0.221	0.09	2.6094e-07	7	Trf
Fgl2.1	1.16921e-11	-0.279588	0.046	0.176	3.2724e-07	7	Fgl2
Arf5	1.23924e-11	-0.310659	0.487	0.66	3.4684e-07	7	Arf5
Il2rg	1.38646e-11	-0.336858	0.518	0.68	3.88042e-07	7	Il2rg
Tceb2.2	1.67375e-11	-0.273151	0.734	0.841	4.68449e-07	7	Tceb2
Car2.1	1.85949e-11	-0.354557	0.284	0.471	5.20433e-07	7	Car2
Cd2.3	2.3151e-11	-0.329381	0.49	0.673	6.4795e-07	7	Cd2
Pdcd4.1	3.10305e-11	-0.331283	0.614	0.767	8.68483e-07	7	Pdcd4
Arl5c.1	3.12675e-11	-0.263441	0.038	0.158	8.75114e-07	7	Arl5c
1110008P14Rik.1	3.29169e-11	-0.301406	0.104	0.26	9.2128e-07	7	1110008P14Rik
Reep5.1	3.7574e-11	-0.345651	0.586	0.698	1.05162e-06	7	Reep5
Cox7b	4.40795e-11	-0.291585	0.627	0.757	1.2337e-06	7	Cox7b
Cd44.1	4.96371e-11	-0.32649	0.129	0.286	1.38924e-06	7	Cd44
Snx5.1	5.00915e-11	0.287947	0.657	0.525	1.40196e-06	7	Snx5
Ptp4a3	5.3621e-11	-0.299354	0.168	0.34	1.50074e-06	7	Ptp4a3
Cox6a1.1	5.99312e-11	-0.281645	0.711	0.841	1.67735e-06	7	Cox6a1
Efhd2	7.40885e-11	-0.304922	0.645	0.775	2.07359e-06	7	Efhd2
Cdc42.1	9.20158e-11	-0.277082	0.751	0.844	2.57534e-06	7	Cdc42
Aldoa	1.31513e-10	0.259173	0.723	0.618	3.68078e-06	7	Aldoa
Ifngr1.3	2.06325e-10	0.271665	0.855	0.746	5.77462e-06	7	Ifngr1
Ndufb7.1	2.1215e-10	-0.289781	0.589	0.733	5.93764e-06	7	Ndufb7
Cma1.1	2.29228e-10	-0.373495	0.023	0.118	6.41563e-06	7	Cma1
Gnai2.1	3.08755e-10	-0.302598	0.693	0.795	8.64145e-06	7	Gnai2
Ndufv3	3.16644e-10	-0.308733	0.429	0.603	8.86224e-06	7	Ndufv3
Psmb3.1	3.31959e-10	-0.296382	0.424	0.597	9.29087e-06	7	Psmb3
Itgb1.2	3.59607e-10	-0.312529	0.401	0.577	1.00647e-05	7	Itgb1
Hn1.1	3.67426e-10	-0.270951	0.599	0.744	1.02835e-05	7	Hn1
Rab8a	4.5978e-10	-0.287838	0.244	0.421	1.28683e-05	7	Rab8a
Capza1	5.01344e-10	-0.29696	0.261	0.439	1.40316e-05	7	Capza1
Cox5b.2	5.28009e-10	-0.252218	0.746	0.824	1.47779e-05	7	Cox5b
B4galnt1.1	5.38498e-10	-0.29708	0.475	0.643	1.50715e-05	7	B4galnt1
Fam53b.1	6.98327e-10	-0.267931	0.223	0.398	1.95448e-05	7	Fam53b
Cdk2ap2.1	7.02067e-10	-0.310817	0.401	0.566	1.96495e-05	7	Cdk2ap2
Ly6e.2	7.78837e-10	-0.320856	0.741	0.829	2.17981e-05	7	Ly6e
Atp5k.2	8.05044e-10	-0.271967	0.665	0.768	2.25316e-05	7	Atp5k
Tmem167.1	1.11465e-09	-0.251822	0.322	0.505	3.11968e-05	7	Tmem167
S100a8.5	1.61011e-09	-1.7831	0.282	0.137	4.50637e-05	7	S100a8
Ldha.1	1.86502e-09	-0.277802	0.513	0.665	5.21983e-05	7	Ldha
Epb41l4aos	2.39591e-09	0.257193	0.371	0.239	6.70568e-05	7	Epb41l4aos
Hmgb2.3	2.72028e-09	-0.378223	0.662	0.788	7.61353e-05	7	Hmgb2
Glipr2	3.32336e-09	-0.27498	0.234	0.4	9.30141e-05	7	Glipr2
Fyn	3.74704e-09	-0.295306	0.335	0.498	0.000104872	7	Fyn
Camp.1	4.06961e-09	-0.785146	0.145	0.047	0.0001139	7	Camp
As3mt.2	4.14035e-09	-0.282966	0.053	0.164	0.00011588	7	As3mt
Nedd8	4.84233e-09	-0.265391	0.579	0.713	0.000135527	7	Nedd8
Zap70	4.85842e-09	-0.268196	0.206	0.365	0.000135978	7	Zap70
Ikzf3	4.88315e-09	-0.274551	0.14	0.285	0.00013667	7	Ikzf3
Vim.5	4.95666e-09	-0.364165	0.685	0.757	0.000138727	7	Vim
Klrc2.1	5.80256e-09	-0.299195	0.53	0.686	0.000162402	7	Klrc2
Ccl4.4	8.9285e-09	-0.739633	0.472	0.596	0.000249891	7	Ccl4
Rap1b.2	1.10354e-08	-0.305798	0.269	0.425	0.00030886	7	Rap1b
Atp5j	1.25274e-08	-0.255705	0.723	0.82	0.000350618	7	Atp5j
Ccl3.5	1.51715e-08	-0.587519	0.454	0.561	0.000424621	7	Ccl3
Klra1.1	1.52642e-08	-0.413007	0.107	0.215	0.000427214	7	Klra1
Klrb1f	1.95627e-08	-0.294691	0.406	0.561	0.000547522	7	Klrb1f
Cbl	1.97215e-08	-0.277672	0.216	0.369	0.000551966	7	Cbl
Sqstm1	2.51461e-08	0.255789	0.53	0.413	0.000703789	7	Sqstm1
Smdt1	3.25997e-08	-0.275743	0.503	0.64	0.0009124	7	Smdt1
Cyb5r4.1	3.39996e-08	-0.250023	0.188	0.338	0.000951582	7	Cyb5r4
Mef2a	3.50037e-08	-0.25243	0.175	0.322	0.000979684	7	Mef2a
Apbb1ip.1	3.79455e-08	-0.293764	0.332	0.481	0.00106202	7	Apbb1ip
Arhgap9	5.02298e-08	-0.257766	0.434	0.591	0.00140583	7	Arhgap9
Emp3.2	5.20165e-08	-0.310959	0.53	0.662	0.00145584	7	Emp3
Slc9a3r1	5.29337e-08	-0.254262	0.269	0.427	0.00148151	7	Slc9a3r1
Xcl1.2	5.97501e-08	-0.442192	0.698	0.782	0.00167229	7	Xcl1
Prex1.2	6.7839e-08	-0.304151	0.266	0.413	0.00189868	7	Prex1
Actr2	7.02581e-08	-0.273785	0.401	0.547	0.00196638	7	Actr2
Cd244	7.61047e-08	-0.261761	0.279	0.435	0.00213002	7	Cd244
Arpc4	1.03008e-07	-0.251462	0.497	0.646	0.00288298	7	Arpc4
Serinc3	1.26586e-07	-0.259922	0.629	0.753	0.00354288	7	Serinc3
Ccnd2.2	1.2975e-07	-0.299474	0.604	0.714	0.00363143	7	Ccnd2
Myo1f.2	1.38136e-07	-0.270934	0.19	0.329	0.00386614	7	Myo1f
Adgre5.2	1.62433e-07	-0.271615	0.371	0.525	0.00454619	7	Adgre5
Tnfaip8l2.1	2.09867e-07	-0.253002	0.122	0.242	0.00587375	7	Tnfaip8l2
Pet100	2.19196e-07	-0.26525	0.297	0.436	0.00613487	7	Pet100
Gabarapl2.1	2.49164e-07	-0.252474	0.505	0.643	0.0069736	7	Gabarapl2
Ifng.2	2.6587e-07	-0.346461	0.249	0.388	0.00744116	7	Ifng
Gem	3.30515e-07	-0.362986	0.497	0.598	0.00925046	7	Gem
Skap1	3.36961e-07	-0.254652	0.566	0.657	0.00943087	7	Skap1
Nt5c	6.0629e-07	-0.258977	0.363	0.504	0.0169688	7	Nt5c
Atox1.1	9.23511e-07	-0.252596	0.505	0.641	0.0258472	7	Atox1
Cd48.1	1.37674e-06	-0.264446	0.269	0.399	0.0385323	7	Cd48
Sytl3.1	1.50211e-06	-0.253572	0.142	0.255	0.042041	7	Sytl3
Tmem176b	1.96192e-64	1.64997	0.783	0.022	5.49102e-60	8	Tmem176b
Tmem176a	7.22902e-49	1.36472	0.65	0.023	2.02326e-44	8	Tmem176a
Cxcr6	2.40798e-41	1.02947	0.483	0.003	6.73944e-37	8	Cxcr6
S100a4.2	5.28852e-37	1.63581	0.733	0.087	1.48015e-32	8	S100a4
Ly6e.3	5.23181e-36	1.01535	1	0.801	1.46428e-31	8	Ly6e
Rora	1.70288e-34	1.20447	0.6	0.057	4.76602e-30	8	Rora
Ckb	1.86452e-34	1.17415	0.467	0.01	5.21842e-30	8	Ckb
Klrb1b	2.32625e-32	1.18317	0.85	0.201	6.51071e-28	8	Klrb1b
Ltb.3	1.32972e-26	1.14122	0.933	0.569	3.72163e-22	8	Ltb
Klre1.1	5.56604e-26	-1.13992	0.35	0.907	1.55782e-21	8	Klre1
Cd74	2.65004e-25	1.32105	0.45	0.044	7.41692e-21	8	Cd74
Ramp1	5.71856e-24	1.04032	0.5	0.086	1.60051e-19	8	Ramp1
Arg1	7.908e-24	0.636911	0.25	0	2.21329e-19	8	Arg1
Klra7.4	7.90075e-23	-1.64768	0.083	0.698	2.21126e-18	8	Klra7
Gimap3	1.53637e-22	0.869726	0.933	0.656	4.3e-18	8	Gimap3
Tnfrsf25	2.13657e-21	0.58331	0.267	0.002	5.97983e-17	8	Tnfrsf25
Fth1	6.83495e-21	0.601668	1	0.981	1.91297e-16	8	Fth1
Podnl1	1.00765e-20	0.70693	0.383	0.024	2.82021e-16	8	Podnl1
Sell.2	3.3908e-20	-1.08826	0.083	0.675	9.49016e-16	8	Sell
B2m	4.07828e-20	0.448689	1	0.999	1.14143e-15	8	B2m
Klra4.5	1.88485e-19	-2.15934	0.067	0.606	5.27532e-15	8	Klra4
Gzma.6	1.58696e-18	-2.12399	0.283	0.788	4.44158e-14	8	Gzma
Tyrobp.5	4.64911e-18	-0.782885	0.883	0.992	1.30119e-13	8	Tyrobp
Eomes.3	1.18506e-16	-0.954698	0.017	0.512	3.31674e-12	8	Eomes
Klra8.6	1.39181e-16	-1.82801	0.067	0.582	3.89541e-12	8	Klra8
Xcl1.3	2.37953e-16	0.875531	0.95	0.755	6.65983e-12	8	Xcl1
St6galnac3	2.71093e-16	0.686166	0.383	0.048	7.58736e-12	8	St6galnac3
Il7r.1	3.14059e-16	0.837903	0.383	0.038	8.78987e-12	8	Il7r
H2-Eb1	1.64327e-15	0.667173	0.267	0.017	4.59918e-11	8	H2-Eb1
Rpl28.1	5.97194e-15	-0.467486	1	0.994	1.67143e-10	8	Rpl28
Nebl	6.243e-15	0.496975	0.25	0.009	1.74729e-10	8	Nebl
Gpr183	1.56359e-14	0.664578	0.317	0.036	4.37618e-10	8	Gpr183
Ifngr1.4	2.21828e-14	0.702172	0.933	0.766	6.20852e-10	8	Ifngr1
H2-Ab1	2.88017e-14	0.646341	0.3	0.036	8.06102e-10	8	H2-Ab1
Cd81	1.13254e-13	0.467685	0.167	0.004	3.16974e-09	8	Cd81
Lgals1.6	1.01944e-12	-0.99722	0.667	0.91	2.8532e-08	8	Lgals1
Id2.3	1.4329e-12	0.686627	0.967	0.848	4.01041e-08	8	Id2
Cxcr3.1	1.53282e-12	0.65828	0.4	0.139	4.29004e-08	8	Cxcr3
Ccl5.3	4.46521e-12	-0.753383	0.967	0.999	1.24972e-07	8	Ccl5
H2-Aa	5.45789e-12	0.567305	0.25	0.031	1.52755e-07	8	H2-Aa
Asb2	7.44952e-12	0.519795	0.25	0.021	2.08497e-07	8	Asb2
5430421N21Rik	1.00779e-11	0.393438	0.167	0.004	2.82061e-07	8	5430421N21Rik
Cd160.1	1.67733e-11	0.697131	0.617	0.297	4.6945e-07	8	Cd160
Cd82	4.27993e-11	0.632956	0.6	0.344	1.19787e-06	8	Cd82
Gm26740.2	1.57089e-10	0.661004	0.667	0.303	4.39662e-06	8	Gm26740
Slc6a13	1.74723e-10	0.33466	0.167	0.006	4.89015e-06	8	Slc6a13
Cd7.5	1.87814e-10	0.617166	0.883	0.678	5.25653e-06	8	Cd7
Itgb7.1	3.38826e-10	0.633806	0.7	0.355	9.48308e-06	8	Itgb7
Maf	4.09847e-10	0.688228	0.45	0.127	1.14708e-05	8	Maf
Serpina3g.1	4.3188e-10	0.643594	0.783	0.547	1.20875e-05	8	Serpina3g
Nkg7.3	4.38646e-10	-0.504991	0.967	0.992	1.22768e-05	8	Nkg7
Cd226	5.30328e-10	0.487556	0.25	0.049	1.48428e-05	8	Cd226
Irf1	9.13755e-10	0.546637	0.483	0.315	2.55742e-05	8	Irf1
Sh2d1a.1	9.66417e-10	-0.743729	0.15	0.546	2.70481e-05	8	Sh2d1a
Ncr1.3	1.35126e-09	0.554962	0.8	0.686	3.78191e-05	8	Ncr1
Klra9.3	1.98621e-09	-0.951097	0.033	0.377	5.559e-05	8	Klra9
Tmsb10.3	2.14632e-09	0.387881	1	0.999	6.00712e-05	8	Tmsb10
Tubb6	3.10093e-09	0.363574	0.183	0.016	8.6789e-05	8	Tubb6
Odc1.1	3.5968e-09	0.59828	0.45	0.176	0.000100667	8	Odc1
Abhd8	5.34577e-09	0.543191	0.467	0.229	0.000149617	8	Abhd8
Ikzf2.4	5.751e-09	0.665884	0.583	0.282	0.000160959	8	Ikzf2
Ly6c2.4	1.34257e-08	0.943405	0.433	0.123	0.000375758	8	Ly6c2
Serinc3.1	1.57756e-08	0.462138	0.8	0.72	0.000441527	8	Serinc3
Rbl2	2.23559e-08	0.53365	0.433	0.203	0.000625696	8	Rbl2
Klri2	2.60737e-08	-0.750058	0.233	0.606	0.000729751	8	Klri2
Ctla2a.5	3.0142e-08	-0.884773	0.367	0.687	0.000843614	8	Ctla2a
Rpl7	3.57565e-08	-0.27647	1	1	0.00100075	8	Rpl7
Ccl3.6	5.4936e-08	-0.925912	0.183	0.549	0.00153755	8	Ccl3
Tnfsf14.1	6.5361e-08	0.519225	0.333	0.086	0.00182932	8	Tnfsf14
Cd200r1	7.22864e-08	0.318796	0.15	0.009	0.00202315	8	Cd200r1
Tasp1	7.37179e-08	0.424727	0.233	0.039	0.00206322	8	Tasp1
Gimap4.1	9.88947e-08	0.459301	0.933	0.854	0.00276786	8	Gimap4
Inpp4b	1.07723e-07	0.373783	0.217	0.044	0.00301494	8	Inpp4b
Klrd1.1	1.20687e-07	-0.359763	0.717	0.94	0.00337778	8	Klrd1
Tm6sf1.2	1.35798e-07	-0.576273	0.083	0.41	0.00380071	8	Tm6sf1
Lysmd2	3.31507e-07	0.344574	0.15	0.031	0.00927823	8	Lysmd2
1700025G04Rik	4.38605e-07	-0.333377	0.15	0.448	0.0122757	8	1700025G04Rik
Cst7.1	4.48113e-07	-0.41865	0.183	0.508	0.0125418	8	Cst7
Klra1.2	7.00895e-07	-0.610203	0	0.196	0.0196166	8	Klra1
Etv3	7.55318e-07	0.491672	0.35	0.14	0.0211398	8	Etv3
Camk4	9.0765e-07	0.267545	0.15	0.011	0.0254033	8	Camk4
Pdia3	1.06367e-06	0.440052	0.7	0.482	0.0297701	8	Pdia3
Serpina3f	1.36885e-06	0.511421	0.2	0.052	0.0383113	8	Serpina3f
Fyn.1	1.46625e-06	-0.531903	0.15	0.471	0.0410373	8	Fyn
Tmem154	1.48057e-06	0.337529	0.183	0.038	0.0414383	8	Tmem154
Anxa2.3	1.77773e-06	-0.5271	0.533	0.808	0.0497551	8	Anxa2
