# Supplementary material for: Single-cell transcriptome reveals the novel role of T-bet in suppressing the immature NK gene signature
Source: eLife journal article supplement (doi:10.7554/elife.51339), 2020-05-14
Supplement: supp [file elife-51339-supp-v1.zip › elife_poa_e51339_Supplementary_file_3.xlsx]

## Sheet: RictorWTKO_NK_PCA_markers
Supplementary File 3. DEGs of clusters formed by WT and Rictor-deficient cells (logfc > 0.25; p_val_adj < 0.05). Related to Figure 3.
	p_val	avg_logFC	pct.1	pct.2	p_val_adj	cluster	gene
Cd3d	7.14865e-34	1.07059	0.415	0.095	2.00076e-29	1	Cd3d
Cd3g	1.4231e-31	0.897917	0.38	0.051	3.98298e-27	1	Cd3g
Cd3e	2.81129e-26	0.486119	0.205	0.006	7.86823e-22	1	Cd3e
S100a10	8.14807e-17	-0.444933	0.936	0.964	2.28048e-12	1	S100a10
Vim	4.91795e-12	-0.567673	0.55	0.757	1.37643e-07	1	Vim
Gzma	1.13669e-11	-0.568212	0.848	0.954	3.18138e-07	1	Gzma
Nfkbia	4.12447e-10	-0.552462	0.503	0.712	1.15436e-05	1	Nfkbia
H2afz	1.31463e-09	-0.328601	0.977	0.982	3.67939e-05	1	H2afz
Klk8	3.04491e-09	0.322897	0.164	0.033	8.52209e-05	1	Klk8
Lgals1	8.14356e-09	-0.405204	0.906	0.917	0.000227922	1	Lgals1
Ptma	1.55865e-08	-0.275367	0.994	0.983	0.000436234	1	Ptma
Borcs7	2.42688e-08	-0.406584	0.082	0.271	0.000679236	1	Borcs7
Actg1	4.50945e-08	-0.264477	0.988	0.986	0.0012621	1	Actg1
H3f3a	9.40636e-08	-0.344016	0.93	0.974	0.00263265	1	H3f3a
Ubb	3.61423e-07	-0.297314	0.988	0.993	0.0101155	1	Ubb
Thy1	3.72803e-07	0.319416	0.684	0.469	0.010434	1	Thy1
Ier2	5.91996e-07	-0.399687	0.702	0.811	0.0165688	1	Ier2
S100a11	1.64407e-06	-0.279388	0.795	0.863	0.0460142	1	S100a11
Nme1	5.87073e-21	0.596346	0.839	0.587	1.6431e-16	2	Nme1
Eif5a	6.22062e-18	0.477544	0.948	0.834	1.74103e-13	2	Eif5a
Nhp2	5.31131e-13	0.497619	0.574	0.281	1.48653e-08	2	Nhp2
Mettl1	9.41339e-13	0.402895	0.232	0.044	2.63462e-08	2	Mettl1
Hsp90ab1	1.74932e-12	0.369071	0.942	0.845	4.89599e-08	2	Hsp90ab1
Galk1	4.01097e-12	0.303237	0.277	0.07	1.12259e-07	2	Galk1
Nsun2	3.70953e-11	0.280505	0.342	0.121	1.03822e-06	2	Nsun2
Set	5.48039e-11	0.410944	0.703	0.429	1.53385e-06	2	Set
Apex1	1.92884e-10	0.336334	0.206	0.044	5.39844e-06	2	Apex1
Ncl	3.10585e-10	0.419558	0.845	0.682	8.69265e-06	2	Ncl
Hspe1	9.19726e-10	0.393272	0.774	0.618	2.57413e-05	2	Hspe1
Srm	1.30859e-09	0.345665	0.252	0.073	3.66248e-05	2	Srm
Pdcd11	2.58616e-09	0.378011	0.284	0.096	7.23813e-05	2	Pdcd11
Rrp1b	4.41121e-09	0.26225	0.2	0.047	0.000123461	2	Rrp1b
Rrp15	8.41745e-09	0.32403	0.206	0.053	0.000235588	2	Rrp15
Ndufaf4	1.26895e-08	0.259956	0.284	0.101	0.000355154	2	Ndufaf4
Eif3b	1.8632e-08	0.362752	0.381	0.169	0.000521472	2	Eif3b
Nop10	2.13536e-08	0.370395	0.794	0.592	0.000597643	2	Nop10
Ppa1	2.28377e-08	0.270185	0.252	0.081	0.000639182	2	Ppa1
Fbl	2.41336e-08	0.400916	0.568	0.34	0.00067545	2	Fbl
Gcsh	3.2417e-08	0.259987	0.226	0.066	0.000907288	2	Gcsh
Gpatch4	4.93683e-08	0.27432	0.181	0.044	0.00138172	2	Gpatch4
Ppan	8.96117e-08	0.337498	0.271	0.101	0.00250805	2	Ppan
Nolc1	1.11194e-07	0.295919	0.297	0.115	0.00311209	2	Nolc1
Epsti1	1.1401e-07	-0.389568	0.677	0.797	0.00319092	2	Epsti1
Erh	1.23949e-07	0.320848	0.703	0.584	0.00346908	2	Erh
Vim.1	1.3929e-07	-0.408506	0.71	0.734	0.00389846	2	Vim
Atp5g1	1.54693e-07	0.3247	0.768	0.636	0.00432954	2	Atp5g1
Eif5b	1.54927e-07	0.366845	0.626	0.398	0.0043361	2	Eif5b
Ranbp1	1.94363e-07	0.39163	0.626	0.42	0.00543983	2	Ranbp1
Ddx21	1.97345e-07	0.356581	0.639	0.409	0.00552328	2	Ddx21
Mif	2.16797e-07	0.37533	0.716	0.554	0.00606772	2	Mif
Cd7	2.91959e-07	-0.363399	0.677	0.784	0.00817135	2	Cd7
Tmem147	4.33628e-07	0.284336	0.381	0.182	0.0121364	2	Tmem147
Rps27l	7.12429e-07	0.305778	0.813	0.642	0.0199395	2	Rps27l
Gtpbp4	1.04273e-06	0.264492	0.303	0.13	0.0291838	2	Gtpbp4
Cycs	1.55987e-06	0.266305	0.735	0.524	0.0436577	2	Cycs
Klra4.1	4.98338e-25	0.837959	0.74	0.476	1.39475e-20	3	Klra4
Ltb.1	9.23511e-24	-0.870822	0.41	0.666	2.58472e-19	3	Ltb
Klra8	2.64551e-16	0.728812	0.665	0.435	7.40426e-12	3	Klra8
Klra7	2.14948e-15	0.501097	0.793	0.54	6.01597e-11	3	Klra7
Ccl3.1	5.49169e-15	0.669509	0.789	0.572	1.53702e-10	3	Ccl3
Gzma.2	6.64492e-15	0.429255	0.982	0.933	1.85978e-10	3	Gzma
Ccl4	2.88572e-12	0.478204	0.863	0.677	8.07656e-08	3	Ccl4
Il7r.1	1.36551e-11	-0.492933	0.018	0.169	3.82179e-07	3	Il7r
Ly6e	3.44223e-10	-0.382595	0.775	0.863	9.63411e-06	3	Ly6e
S100a8	5.57095e-10	0.306738	0.652	0.421	1.5592e-05	3	S100a8
Socs2.1	3.37872e-09	-0.463582	0.057	0.209	9.45637e-05	3	Socs2
Ptma.1	1.61118e-08	-0.266988	0.982	0.985	0.000450937	3	Ptma
Irf8	4.09344e-08	0.259856	0.7	0.494	0.00114567	3	Irf8
Gzma.3	2.60983e-47	1.17887	1	0.936	7.3044e-43	4	Gzma
Rps24	4.33365e-29	-0.283103	1	0.998	1.2129e-24	4	Rps24
Ltb.2	1.18513e-28	-1.16761	0.161	0.67	3.31695e-24	4	Ltb
Ccl3.2	3.63493e-28	1.12017	0.871	0.582	1.01734e-23	4	Ccl3
Rplp1	3.78738e-28	-0.345919	1	1	1.06001e-23	4	Rplp1
Rps28	4.75809e-28	-0.3627	1	0.995	1.33169e-23	4	Rps28
Gzmb.1	2.95346e-27	1.06647	0.726	0.392	8.26614e-23	4	Gzmb
Rps19	1.06639e-26	-0.42441	0.984	0.997	2.98462e-22	4	Rps19
Rpl23	2.91245e-26	-0.327689	0.992	0.998	8.15137e-22	4	Rpl23
Rps18	4.21407e-25	-0.345659	0.992	0.999	1.17943e-20	4	Rps18
Borcs7.1	6.4466e-25	0.871786	0.508	0.222	1.80428e-20	4	Borcs7
Lgals1.1	1.79326e-24	0.754112	0.952	0.912	5.01898e-20	4	Lgals1
Rpl12	2.82199e-24	-0.452229	0.968	0.995	7.89818e-20	4	Rpl12
Cma1.2	2.86105e-24	1.02899	0.452	0.146	8.0075e-20	4	Cma1
Rpl18a	5.23577e-24	-0.263487	1	1	1.46539e-19	4	Rpl18a
Ccl4.1	1.23886e-23	1.12622	0.887	0.689	3.46731e-19	4	Ccl4
Rpl18	2.80279e-23	-0.372505	1	0.997	7.84446e-19	4	Rpl18
Rpl38	2.90659e-23	-0.309014	0.992	0.998	8.13496e-19	4	Rpl38
Rpl32	3.80381e-23	-0.285833	1	1	1.06461e-18	4	Rpl32
Rps9	1.84653e-22	-0.364529	1	0.995	5.16808e-18	4	Rps9
Irf8.1	2.22123e-22	0.829969	0.782	0.502	6.21678e-18	4	Irf8
Nkg7	4.54901e-22	0.480349	1	0.992	1.27318e-17	4	Nkg7
Ctsd.1	6.34547e-22	0.646434	0.895	0.782	1.77597e-17	4	Ctsd
Rps27a	1.30191e-21	-0.280534	1	1	3.64378e-17	4	Rps27a
Spn	2.07647e-21	0.718595	0.653	0.413	5.81163e-17	4	Spn
Rpsa	4.4542e-21	-0.335782	0.992	0.997	1.24664e-16	4	Rpsa
AW112010	6.72846e-21	0.508382	1	0.996	1.88316e-16	4	AW112010
Fcer1g	8.73483e-21	0.454673	1	0.99	2.4447e-16	4	Fcer1g
Rpl17	1.04592e-20	-0.286842	0.992	0.999	2.92731e-16	4	Rpl17
Klrg1	1.86248e-20	1.0265	0.282	0.048	5.21271e-16	4	Klrg1
Zeb2.1	6.9737e-20	0.819803	0.468	0.156	1.9518e-15	4	Zeb2
Rps15a	8.59472e-20	-0.292681	1	1	2.40549e-15	4	Rps15a
Xcl1.1	7.91209e-19	-0.840819	0.46	0.827	2.21443e-14	4	Xcl1
Rpl13	1.89559e-18	-0.275148	1	0.997	5.30538e-14	4	Rpl13
Rps7	2.90443e-18	-0.285305	0.984	0.998	8.12892e-14	4	Rps7
Rpl29	4.206e-18	-0.314647	0.984	0.992	1.17718e-13	4	Rpl29
Gm10073	6.8506e-18	-0.367399	0.976	0.983	1.91735e-13	4	Gm10073
Rps6	9.91321e-18	-0.290136	1	0.998	2.77451e-13	4	Rps6
Rps12	1.277e-16	-0.321263	0.992	0.997	3.57406e-12	4	Rps12
Rpl36a	1.55873e-16	-0.34628	0.976	0.991	4.36258e-12	4	Rpl36a
Rplp2	2.83116e-16	-0.250969	1	0.998	7.92385e-12	4	Rplp2
Ly6e.1	3.0882e-16	-0.544964	0.565	0.877	8.64324e-12	4	Ly6e
Rps2	7.02448e-16	-0.362119	0.952	0.994	1.96601e-11	4	Rps2
Rps5	7.51071e-16	-0.292054	0.984	0.997	2.1021e-11	4	Rps5
Rplp0	2.72349e-15	-0.266145	0.984	0.998	7.62251e-11	4	Rplp0
Sdcbp	2.93538e-15	0.463043	0.492	0.407	8.21555e-11	4	Sdcbp
Rpl3	6.41402e-15	-0.28988	0.984	0.994	1.79516e-10	4	Rpl3
Malat1	1.23409e-14	0.469073	1	0.998	3.45398e-10	4	Malat1
Gm9493	1.75526e-14	-0.327102	0.968	0.984	4.91263e-10	4	Gm9493
Klra9.1	1.95401e-14	0.83479	0.524	0.293	5.46889e-10	4	Klra9
Myl6	2.58171e-14	0.386274	0.992	0.982	7.22569e-10	4	Myl6
Snx5	5.09862e-14	0.418	0.484	0.432	1.427e-09	4	Snx5
Ifng.1	5.2656e-14	0.782423	0.573	0.373	1.47374e-09	4	Ifng
Rpl6	9.37427e-14	-0.271266	0.984	0.994	2.62367e-09	4	Rpl6
Eef1b2	1.0916e-13	-0.375241	0.815	0.957	3.05518e-09	4	Eef1b2
H2afz.1	1.17209e-13	0.3948	0.992	0.98	3.28044e-09	4	H2afz
Ccl5.1	1.45453e-13	0.44793	1	1	4.07094e-09	4	Ccl5
Rps20	1.69836e-13	-0.325991	0.976	0.993	4.75337e-09	4	Rps20
Cox7a2l	3.29291e-13	-0.356238	0.605	0.888	9.21618e-09	4	Cox7a2l
Rpl24	3.46163e-13	-0.277423	0.984	0.995	9.68841e-09	4	Rpl24
Rpl30	5.04839e-13	-0.25146	0.992	0.997	1.41294e-08	4	Rpl30
Cd27	5.81775e-13	-0.512357	0.25	0.596	1.62827e-08	4	Cd27
Rps12-ps3	1.0078e-12	-0.308507	0.984	0.983	2.82063e-08	4	Rps12-ps3
Reep5	1.06948e-12	0.360325	0.726	0.712	2.99327e-08	4	Reep5
Npm1	1.79929e-12	-0.461435	0.653	0.881	5.03585e-08	4	Npm1
Arpc1b	3.64827e-12	0.369126	0.984	0.945	1.02108e-07	4	Arpc1b
Gm10263	4.77708e-12	-0.413262	0.508	0.812	1.33701e-07	4	Gm10263
Rpl10a	1.02e-11	-0.263326	0.984	0.991	2.85478e-07	4	Rpl10a
Gm11808	1.1804e-11	-0.28539	0.96	0.987	3.30371e-07	4	Gm11808
Rps18-ps3	1.899e-11	-0.401682	0.831	0.954	5.31493e-07	4	Rps18-ps3
Ifitm10	2.28045e-11	0.396269	0.387	0.332	6.38252e-07	4	Ifitm10
Emp3	2.4929e-11	0.495646	0.774	0.662	6.97714e-07	4	Emp3
Uba52	3.8297e-11	-0.286352	0.919	0.98	1.07186e-06	4	Uba52
Ctla2a	5.10173e-11	-0.479732	0.573	0.841	1.42787e-06	4	Ctla2a
Vim.2	5.5153e-11	0.442902	0.774	0.727	1.54362e-06	4	Vim
S100a13.1	5.89581e-11	0.296446	0.685	0.712	1.65012e-06	4	S100a13
Dok2	6.25844e-11	0.376557	0.581	0.556	1.75161e-06	4	Dok2
Scimp	7.22715e-11	0.549095	0.282	0.131	2.02274e-06	4	Scimp
Dpm1	1.34622e-10	0.299721	0.242	0.23	3.76781e-06	4	Dpm1
Emb	1.45339e-10	-0.533507	0.161	0.457	4.06773e-06	4	Emb
Rpl35	1.49714e-10	-0.302605	0.976	0.988	4.1902e-06	4	Rpl35
Plek	1.60525e-10	0.516223	0.524	0.383	4.49276e-06	4	Plek
Mrps24	1.79807e-10	0.352649	0.492	0.447	5.03245e-06	4	Mrps24
Gnb2l1	1.97591e-10	-0.292393	0.871	0.978	5.53017e-06	4	Gnb2l1
Eif3c	3.18049e-10	0.258623	0.347	0.386	8.90155e-06	4	Eif3c
Itga4	3.50329e-10	0.499119	0.484	0.4	9.80501e-06	4	Itga4
Il7r.2	3.53552e-10	-0.528407	0	0.158	9.89522e-06	4	Il7r
Atp6v1f	3.9181e-10	0.256625	0.677	0.717	1.0966e-05	4	Atp6v1f
Cd7.1	6.73096e-10	-0.311223	0.524	0.796	1.88386e-05	4	Cd7
H3f3b	7.20218e-10	0.310613	1	0.99	2.01575e-05	4	H3f3b
Gm8730	8.66003e-10	-0.286856	0.927	0.979	2.42377e-05	4	Gm8730
S1pr5	8.78028e-10	0.536822	0.218	0.062	2.45743e-05	4	S1pr5
Klra7.1	1.10141e-09	0.578258	0.677	0.572	3.08262e-05	4	Klra7
Klf2	1.2512e-09	0.474306	0.387	0.274	3.50186e-05	4	Klf2
Gm2000	1.36072e-09	-0.341525	0.911	0.972	3.80839e-05	4	Gm2000
Klrc2	1.45467e-09	0.42752	0.677	0.572	4.07134e-05	4	Klrc2
Rpl22	1.65252e-09	-0.252233	0.976	0.993	4.62508e-05	4	Rpl22
Arhgef2	1.74353e-09	0.382558	0.323	0.217	4.87978e-05	4	Arhgef2
Socs3	1.77627e-09	-0.457171	0.185	0.464	4.97143e-05	4	Socs3
Gemin7	2.28456e-09	0.331613	0.331	0.268	6.39403e-05	4	Gemin7
Bin2	2.48499e-09	0.280284	0.645	0.656	6.95499e-05	4	Bin2
Ptprc	2.56152e-09	0.358747	0.903	0.906	7.16919e-05	4	Ptprc
Foxn3	2.83629e-09	0.395621	0.194	0.099	7.93822e-05	4	Foxn3
Ppp2r2a	3.08767e-09	0.335884	0.21	0.143	8.64176e-05	4	Ppp2r2a
Psmb6	3.31891e-09	0.250939	0.516	0.531	9.28897e-05	4	Psmb6
Vasp	3.60863e-09	0.293376	0.694	0.716	0.000100998	4	Vasp
Ccnd3	4.00752e-09	0.280749	0.589	0.599	0.000112163	4	Ccnd3
Fyb	4.19962e-09	0.363905	0.484	0.448	0.000117539	4	Fyb
Klre1	5.10838e-09	0.340795	0.863	0.844	0.000142973	4	Klre1
Tceb2	5.16008e-09	0.250093	0.782	0.829	0.00014442	4	Tceb2
Cd48	5.60868e-09	0.332094	0.387	0.36	0.000156976	4	Cd48
Cmtm7.1	6.08306e-09	-0.477885	0.298	0.585	0.000170253	4	Cmtm7
Neat1	6.1275e-09	0.354207	0.46	0.412	0.000171497	4	Neat1
Ppil2	6.3768e-09	0.367339	0.347	0.292	0.000178474	4	Ppil2
Card11	6.44276e-09	0.272578	0.145	0.128	0.00018032	4	Card11
Rap1b	6.58438e-09	0.370133	0.581	0.499	0.000184284	4	Rap1b
Rab37	7.67766e-09	0.297856	0.218	0.184	0.000214882	4	Rab37
Ncr1	7.96526e-09	0.407681	0.766	0.689	0.000222932	4	Ncr1
Sertad2	1.00526e-08	0.335372	0.258	0.208	0.000281354	4	Sertad2
Actr2	1.10919e-08	0.2605	0.435	0.468	0.000310441	4	Actr2
Ets1	1.12118e-08	0.303532	0.565	0.552	0.000313795	4	Ets1
Sytl3	1.20967e-08	0.412099	0.298	0.198	0.000338561	4	Sytl3
Churc1.1	1.23213e-08	0.299054	0.605	0.633	0.000344848	4	Churc1
Atp1b1	1.39358e-08	0.372123	0.411	0.335	0.000390035	4	Atp1b1
Pcnp	1.54015e-08	0.322457	0.315	0.245	0.000431057	4	Pcnp
Cst7	1.69951e-08	0.399222	0.54	0.45	0.000475658	4	Cst7
Hmha1	1.80215e-08	0.273273	0.71	0.737	0.000504384	4	Hmha1
Dnajc8	1.9573e-08	0.373591	0.492	0.407	0.000547809	4	Dnajc8
Tyrobp	1.96627e-08	0.283732	1	0.994	0.00055032	4	Tyrobp
Syf2.1	2.13942e-08	0.29708	0.476	0.453	0.000598781	4	Syf2
Selk	2.67253e-08	0.250022	0.613	0.657	0.000747988	4	Selk
Diaph1	2.75635e-08	0.327347	0.435	0.378	0.000771447	4	Diaph1
Rpl36-ps3	2.78052e-08	-0.292348	0.798	0.947	0.000778212	4	Rpl36-ps3
Pycard	3.09825e-08	0.279519	0.621	0.617	0.000867138	4	Pycard
Ly6c2.2	3.13085e-08	0.88979	0.339	0.197	0.000876262	4	Ly6c2
Naa38	3.32419e-08	0.274706	0.323	0.307	0.000930375	4	Naa38
Hist1h1c	3.32598e-08	0.448869	0.21	0.096	0.000930874	4	Hist1h1c
S100a10.1	3.60886e-08	0.250188	0.927	0.964	0.00101005	4	S100a10
Lfng	3.7708e-08	0.35015	0.565	0.511	0.00105537	4	Lfng
Klra3	3.90876e-08	0.492844	0.177	0.14	0.00109398	4	Klra3
Vps4b	4.13212e-08	0.330229	0.234	0.182	0.0011565	4	Vps4b
Arpc5	4.31397e-08	0.28658	0.637	0.654	0.00120739	4	Arpc5
Cdc42se1	4.36604e-08	0.270402	0.355	0.344	0.00122197	4	Cdc42se1
Ccr2	4.44232e-08	-0.25316	0.46	0.715	0.00124332	4	Ccr2
Usp48	4.49211e-08	0.277858	0.202	0.197	0.00125725	4	Usp48
Kmt2e	6.06289e-08	0.305103	0.387	0.417	0.00169688	4	Kmt2e
Itgb2	7.54632e-08	0.346141	0.516	0.469	0.00211207	4	Itgb2
Map2k2	7.58975e-08	0.354957	0.411	0.358	0.00212422	4	Map2k2
Tspan32	7.76598e-08	0.346032	0.403	0.387	0.00217354	4	Tspan32
Tmbim6	8.02696e-08	0.349717	0.573	0.568	0.00224658	4	Tmbim6
Cdca7l	8.48312e-08	0.307388	0.218	0.166	0.00237426	4	Cdca7l
Arhgef1	8.66207e-08	0.270555	0.605	0.61	0.00242434	4	Arhgef1
Anxa2	9.28471e-08	0.29527	0.79	0.803	0.00259861	4	Anxa2
Eef2	1.00158e-07	-0.272203	0.911	0.976	0.00280323	4	Eef2
Msrb1	1.10832e-07	0.354636	0.218	0.131	0.00310196	4	Msrb1
Rasgrp2	1.23641e-07	0.374576	0.29	0.237	0.00346047	4	Rasgrp2
Gm9844	1.3946e-07	-0.342356	0.589	0.815	0.00390321	4	Gm9844
Klf6	1.61514e-07	0.371453	0.468	0.463	0.00452044	4	Klf6
Gm10076	1.71697e-07	-0.270283	0.903	0.974	0.00480545	4	Gm10076
Lrrfip1	1.73867e-07	0.291709	0.435	0.401	0.00486618	4	Lrrfip1
Lamb3	1.74397e-07	0.277286	0.218	0.213	0.00488103	4	Lamb3
Plac8.2	1.96947e-07	-0.328761	0.097	0.294	0.00551215	4	Plac8
Gng5	2.14616e-07	0.251337	0.823	0.857	0.00600668	4	Gng5
Cd247	2.73357e-07	0.29355	0.331	0.298	0.00765071	4	Cd247
Slamf6	2.80641e-07	-0.288415	0.024	0.184	0.00785459	4	Slamf6
Itgal	2.8566e-07	0.282863	0.516	0.492	0.00799505	4	Itgal
Atp6v0b	2.99577e-07	0.265075	0.29	0.262	0.00838457	4	Atp6v0b
Rpl6l	4.27079e-07	-0.277832	0.919	0.965	0.0119531	4	Rpl6l
Serpina3g.1	4.37181e-07	-0.551455	0.274	0.513	0.0122358	4	Serpina3g
Lax1	4.5165e-07	0.261038	0.226	0.215	0.0126408	4	Lax1
Ier2.1	4.55483e-07	0.332166	0.823	0.795	0.0127481	4	Ier2
Tsc22d3.2	4.77746e-07	0.266405	0.21	0.226	0.0133712	4	Tsc22d3
Styk1	5.09789e-07	0.33594	0.185	0.128	0.014268	4	Styk1
Fam103a1	5.20742e-07	0.30354	0.395	0.36	0.0145745	4	Fam103a1
Tram1	5.55557e-07	0.251746	0.452	0.415	0.0155489	4	Tram1
Stx7	5.72293e-07	0.362801	0.234	0.164	0.0160173	4	Stx7
A430078G23Rik	5.86787e-07	0.362788	0.145	0.067	0.016423	4	A430078G23Rik
Card19	6.2125e-07	0.394	0.403	0.31	0.0173875	4	Card19
Itgam	6.24702e-07	0.434511	0.266	0.118	0.0174842	4	Itgam
Kbtbd11	6.46748e-07	-0.347062	0.048	0.226	0.0181012	4	Kbtbd11
Tnrc6c	6.86611e-07	0.287506	0.177	0.112	0.0192169	4	Tnrc6c
Pigx	6.87326e-07	0.257135	0.226	0.177	0.0192369	4	Pigx
Scamp3	7.45109e-07	0.260636	0.355	0.333	0.0208541	4	Scamp3
BC031181	8.20587e-07	0.257423	0.363	0.332	0.0229666	4	BC031181
Thy1.1	8.30161e-07	-0.298171	0.282	0.517	0.0232345	4	Thy1
Socs1	1.08567e-06	-0.352423	0.056	0.23	0.0303859	4	Socs1
Sat1	1.0922e-06	0.382905	0.54	0.445	0.0305686	4	Sat1
Fos.1	1.13532e-06	-0.305919	0.282	0.519	0.0317754	4	Fos
Klra4.2	1.23499e-06	0.571316	0.653	0.506	0.0345649	4	Klra4
Cxcr3	1.41797e-06	-0.355042	0.04	0.206	0.0396861	4	Cxcr3
Mrpl57	1.54845e-06	0.260205	0.484	0.431	0.0433381	4	Mrpl57
Gm10269	1.6836e-06	-0.341028	0.444	0.679	0.0471207	4	Gm10269
Il18rap	1.74148e-06	0.310991	0.427	0.358	0.0487406	4	Il18rap
Calm1	1.75476e-06	0.303115	0.895	0.889	0.0491123	4	Calm1
Hmgb2.2	2.95949e-10	-0.577686	0.756	0.795	8.28303e-06	5	Hmgb2
S100a9.1	4.68165e-10	-0.573606	0.339	0.509	1.3103e-05	5	S100a9
Rpl36-ps3.1	4.38876e-09	0.25262	0.95	0.931	0.000122833	5	Rpl36-ps3
Pim2.2	4.13341e-08	0.381945	0.572	0.345	0.00115686	5	Pim2
Camp	5.98781e-08	-0.388794	0.061	0.217	0.00167587	5	Camp
Ngp.1	1.72193e-07	-0.321212	0.022	0.147	0.00481935	5	Ngp
S100a8.2	9.2021e-07	-0.455046	0.339	0.476	0.0257548	5	S100a8
S100a4.1	1.70088e-06	-0.600367	0.261	0.354	0.0476043	5	S100a4
S100a8.3	4.62542e-10	-0.533831	0.263	0.489	1.29456e-05	6	S100a8
Vim.3	2.32686e-09	0.363022	0.847	0.713	6.51241e-05	6	Vim
Fcgr3.1	4.98506e-08	0.356015	0.432	0.238	0.00139522	6	Fcgr3
Klrd1	1.22391e-07	0.278592	0.958	0.912	0.00342548	6	Klrd1
S100a10.2	1.42164e-07	0.262727	0.989	0.956	0.00397888	6	S100a10
Ier2.2	2.02178e-07	0.299495	0.868	0.786	0.00565856	6	Ier2
Socs2.3	3.33015e-26	0.788612	0.451	0.138	9.32043e-22	7	Socs2
Il7r.3	2.04233e-24	0.830134	0.379	0.103	5.71608e-20	7	Il7r
Ltb.3	7.6973e-20	0.579137	0.835	0.588	2.15432e-15	7	Ltb
Klra4.3	1.21773e-15	-1.0286	0.325	0.552	3.40819e-11	7	Klra4
Ccl4.3	7.41218e-15	-0.975413	0.5	0.743	2.07452e-10	7	Ccl4
Klra7.2	2.36192e-14	-0.757668	0.354	0.62	6.61053e-10	7	Klra7
S100a8.4	1.81915e-13	-0.571484	0.223	0.499	5.09142e-09	7	S100a8
Junb.1	9.4941e-13	0.360199	0.985	0.966	2.65721e-08	7	Junb
Pik3cd	1.37016e-12	0.361843	0.451	0.394	3.83479e-08	7	Pik3cd
Ccl3.4	5.25834e-12	-0.908039	0.403	0.643	1.4717e-07	7	Ccl3
Klra8.2	8.81404e-12	-0.898905	0.296	0.503	2.46687e-07	7	Klra8
S100a9.3	2.61897e-11	-0.558634	0.272	0.524	7.32996e-07	7	S100a9
Id2.2	5.57589e-11	0.323949	0.956	0.887	1.56058e-06	7	Id2
Epsti1.1	2.22179e-10	0.368696	0.85	0.772	6.21834e-06	7	Epsti1
Slfn2.2	5.58858e-10	0.368553	0.626	0.448	1.56413e-05	7	Slfn2
Gimap6	1.19215e-09	0.33917	0.893	0.843	3.33659e-05	7	Gimap6
Ier5	2.15233e-09	0.385964	0.49	0.363	6.02394e-05	7	Ier5
Ccnl1	2.15722e-09	0.295205	0.447	0.382	6.03762e-05	7	Ccnl1
Plac8.4	2.56452e-09	0.495806	0.388	0.257	7.17759e-05	7	Plac8
Rpl28	2.66237e-09	-0.255908	0.985	0.988	7.45145e-05	7	Rpl28
Dnajc15	1.00258e-08	0.3335	0.801	0.706	0.000280602	7	Dnajc15
Cd84	1.82502e-08	0.26926	0.417	0.39	0.000510787	7	Cd84
Serpina3g.2	1.8826e-08	0.386134	0.602	0.473	0.000526903	7	Serpina3g
Irf8.2	2.50132e-08	-0.434951	0.34	0.56	0.00070007	7	Irf8
Rpl22l1	2.814e-08	-0.258879	0.917	0.941	0.000787581	7	Rpl22l1
Ucp2	3.27525e-08	-0.419365	0.505	0.707	0.000916678	7	Ucp2
Btg2.1	3.68095e-08	0.320492	0.772	0.72	0.00103022	7	Btg2
Arl4c.1	3.80709e-08	0.361532	0.442	0.305	0.00106553	7	Arl4c
Trim12a	3.89936e-08	0.275888	0.422	0.351	0.00109135	7	Trim12a
Fam177a	4.73108e-08	0.372556	0.286	0.176	0.00132414	7	Fam177a
Ms4a4b	5.60111e-08	0.262283	0.947	0.887	0.00156764	7	Ms4a4b
Ngp.3	5.94244e-08	-0.311473	0.024	0.15	0.00166317	7	Ngp
1700025G04Rik	7.3931e-08	0.282795	0.534	0.452	0.00206918	7	1700025G04Rik
Jund.1	7.99132e-08	0.304627	0.437	0.391	0.00223661	7	Jund
Itgax.1	9.79747e-08	-0.32316	0.049	0.192	0.00274212	7	Itgax
Gramd3	1.12306e-07	0.321572	0.214	0.09	0.00314323	7	Gramd3
Hs3st3b1	1.13318e-07	0.282343	0.155	0.054	0.00317156	7	Hs3st3b1
Scimp.1	1.39534e-07	-0.320427	0.034	0.164	0.00390526	7	Scimp
Samhd1.1	1.83803e-07	0.337323	0.408	0.327	0.00514427	7	Samhd1
Gzma.5	1.84991e-07	-0.614108	0.932	0.943	0.00517754	7	Gzma
Ly6e.2	2.67035e-07	0.266571	0.898	0.84	0.00747378	7	Ly6e
Luc7l2	3.22108e-07	0.261597	0.451	0.386	0.00901516	7	Luc7l2
Hdac4	4.67542e-07	0.261851	0.194	0.097	0.0130856	7	Hdac4
Nfkbia.2	5.55937e-07	0.307586	0.811	0.665	0.0155596	7	Nfkbia
Pim1.1	6.61526e-07	0.317266	0.816	0.754	0.0185148	7	Pim1
Camp.1	6.62518e-07	-0.31953	0.073	0.218	0.0185425	7	Camp
Whsc1l1	6.7481e-07	0.26537	0.417	0.342	0.0188866	7	Whsc1l1
Jun.2	6.7937e-07	0.39891	0.466	0.331	0.0190142	7	Jun
Lyst	7.97859e-07	0.271214	0.141	0.066	0.0223305	7	Lyst
Rabac1	8.16121e-07	0.295284	0.718	0.615	0.0228416	7	Rabac1
Klra1.2	8.93331e-07	-0.476104	0.053	0.185	0.0250026	7	Klra1
Tnfrsf18	1.21567e-06	0.284532	0.539	0.398	0.0340242	7	Tnfrsf18
2810474O19Rik.2	1.28345e-06	0.320421	0.388	0.279	0.0359212	7	2810474O19Rik
Ckb	1.0524e-41	1.22374	0.481	0.014	2.94545e-37	8	Ckb
Tmem176b	7.18808e-40	1.31353	0.531	0.033	2.0118e-35	8	Tmem176b
S100a4.2	7.09104e-39	1.49349	0.827	0.313	1.98464e-34	8	S100a4
Gzma.6	3.20299e-34	-1.76219	0.704	0.956	8.96453e-30	8	Gzma
5430421N21Rik	2.56626e-28	0.701462	0.346	0.01	7.18244e-24	8	5430421N21Rik
Tmem176a	1.35984e-27	1.03846	0.37	0.022	3.80593e-23	8	Tmem176a
Klrb1b.3	2.55099e-26	1.08621	0.716	0.203	7.13971e-22	8	Klrb1b
Ly6e.3	6.83077e-23	0.767482	0.975	0.841	1.9118e-18	8	Ly6e
Ltb.4	5.04922e-19	0.90442	0.864	0.61	1.41318e-14	8	Ltb
Ccl5.2	1.61105e-18	-0.597028	1	1	4.50902e-14	8	Ccl5
Cxcr6	1.82267e-18	0.70759	0.222	0.005	5.1013e-14	8	Cxcr6
Rgs1.2	4.06065e-17	0.968034	0.667	0.313	1.1365e-12	8	Rgs1
Cd7.2	6.40239e-17	0.732635	0.951	0.761	1.7919e-12	8	Cd7
Klra4.4	8.25959e-17	-1.84641	0.148	0.541	2.3117e-12	8	Klra4
Rora	1.88766e-16	0.626229	0.321	0.033	5.28319e-12	8	Rora
Gimap3.1	3.84494e-16	0.616112	0.852	0.653	1.07612e-11	8	Gimap3
St6galnac3	9.83542e-16	0.61275	0.272	0.024	2.75274e-11	8	St6galnac3
Klra8.3	1.03457e-15	-1.62674	0.086	0.497	2.89556e-11	8	Klra8
Ramp1	1.04971e-14	0.679276	0.457	0.121	2.93793e-10	8	Ramp1
Klre1.1	3.91298e-14	-0.689062	0.556	0.863	1.09516e-09	8	Klre1
Tyrobp.1	9.29339e-14	-0.415616	0.988	0.995	2.60103e-09	8	Tyrobp
Klra7.3	1.70294e-13	-1.13111	0.198	0.605	4.76619e-09	8	Klra7
H2afz.2	3.72961e-13	-0.545395	0.926	0.985	1.04384e-08	8	H2afz
Sell	4.00885e-13	-0.703384	0.247	0.668	1.122e-08	8	Sell
Cd160.1	5.08849e-12	0.682467	0.519	0.221	1.42417e-07	8	Cd160
Lgals1.4	2.62344e-11	-0.721636	0.765	0.925	7.34248e-07	8	Lgals1
B2m	4.80988e-11	0.293389	1	0.997	1.34619e-06	8	B2m
Podnl1	6.60964e-11	0.472949	0.21	0.021	1.8499e-06	8	Podnl1
Gzmb.4	1.97744e-10	-0.981491	0.099	0.441	5.53447e-06	8	Gzmb
Klrb1f	6.69874e-10	0.537597	0.605	0.398	1.87484e-05	8	Klrb1f
Eomes	7.11564e-10	-0.65978	0.173	0.529	1.99153e-05	8	Eomes
Asb2	1.07972e-09	0.341333	0.136	0.005	3.02191e-05	8	Asb2
Ncr1.2	1.12871e-09	0.554326	0.877	0.684	3.15903e-05	8	Ncr1
Cd200r1	2.7207e-09	0.315054	0.136	0.006	7.6147e-05	8	Cd200r1
Ikzf2.1	4.2942e-09	0.660747	0.346	0.103	0.000120186	8	Ikzf2
Cish	1.15678e-08	0.404161	0.173	0.02	0.000323759	8	Cish
Ctla2a.1	1.17001e-08	-0.607833	0.63	0.829	0.000327462	8	Ctla2a
Tasp1	1.38181e-08	0.457177	0.185	0.031	0.00038674	8	Tasp1
Sh2d1a	1.43517e-08	-0.618808	0.21	0.535	0.000401674	8	Sh2d1a
Nkg7.1	3.08513e-08	-0.364669	0.988	0.993	0.000863467	8	Nkg7
Xcl1.2	4.80621e-08	0.567668	0.926	0.786	0.00134516	8	Xcl1
Klrd1.1	9.50043e-08	-0.338143	0.753	0.929	0.00265898	8	Klrd1
Cd226	1.20413e-07	0.416961	0.21	0.045	0.00337011	8	Cd226
Ahcyl2	1.3781e-07	0.410906	0.222	0.068	0.00385703	8	Ahcyl2
Nebl	1.74979e-07	0.359176	0.16	0.021	0.0048973	8	Nebl
Klri2	1.80228e-07	-0.493034	0.247	0.56	0.00504423	8	Klri2
Gpr183	1.80505e-07	0.504978	0.247	0.059	0.00505198	8	Gpr183
Tnfrsf25	1.86244e-07	0.255604	0.111	0.005	0.0052126	8	Tnfrsf25
Id2.3	1.87331e-07	0.348513	1	0.891	0.00524303	8	Id2
Maf	2.43248e-07	0.451251	0.259	0.063	0.00680801	8	Maf
Tnfsf14	1.48582e-06	0.402078	0.259	0.075	0.041585	8	Tnfsf14
Lsp1	1.60345e-06	0.378037	0.679	0.586	0.0448773	8	Lsp1
Klrc1.1	1.74297e-06	0.479028	0.63	0.379	0.0487823	8	Klrc1
Hmgb2.3	2.57066e-81	1.77869	0.887	0.786	7.19476e-77	9	Hmgb2
Stmn1.3	5.92236e-65	1.98314	0.758	0.195	1.65755e-60	9	Stmn1
Rps27rt	2.88238e-63	-0.804209	0.887	1	8.0672e-59	9	Rps27rt
Rps27	6.07492e-52	-0.502718	1	1	1.70025e-47	9	Rps27
Tuba1b.3	6.23309e-49	1.74935	0.742	0.349	1.74452e-44	9	Tuba1b
Tubb5	3.06192e-47	1.31707	0.742	0.538	8.5697e-43	9	Tubb5
2810417H13Rik	2.07402e-43	1.64724	0.645	0.046	5.80477e-39	9	2810417H13Rik
Cks1b.1	1.65196e-40	1.49854	0.71	0.085	4.6235e-36	9	Cks1b
Malat1.1	3.40899e-37	-0.870329	0.952	1	9.54109e-33	9	Malat1
Ptma.2	3.39942e-36	0.890422	0.919	0.987	9.51429e-32	9	Ptma
Hist1h2ap	7.45152e-36	2.85052	0.532	0.165	2.08553e-31	9	Hist1h2ap
Hmgn2.1	8.97358e-36	1.40014	0.742	0.29	2.51153e-31	9	Hmgn2
Mki67	1.17067e-33	1.28167	0.581	0.033	3.27647e-29	9	Mki67
Nusap1	1.29012e-33	1.10859	0.452	0.007	3.6108e-29	9	Nusap1
Ube2c	1.98434e-32	2.15541	0.5	0.053	5.55377e-28	9	Ube2c
Mkrn1.1	4.14604e-32	2.52396	0.613	0.392	1.16039e-27	9	Mkrn1
H3f3a.2	2.78464e-30	1.14009	0.984	0.968	7.79366e-26	9	H3f3a
H2afx.1	4.21769e-30	1.58988	0.597	0.216	1.18045e-25	9	H2afx
Birc5	4.51766e-30	1.46913	0.548	0.074	1.2644e-25	9	Birc5
Cd24a	4.68155e-30	2.89664	0.355	0.021	1.31027e-25	9	Cd24a
Snca	1.19726e-29	3.54424	0.29	0.004	3.35089e-25	9	Snca
Gpx1	1.8047e-29	2.92417	0.742	0.363	5.051e-25	9	Gpx1
Ccl5.3	2.26213e-29	-0.872701	1	1	6.33124e-25	9	Ccl5
Bpgm	4.28055e-29	3.37423	0.355	0.061	1.19804e-24	9	Bpgm
Top2a	6.68025e-29	1.34561	0.581	0.058	1.86967e-24	9	Top2a
Alas2	1.13303e-27	4.24571	0.339	0.011	3.17112e-23	9	Alas2
Sec61g	2.92068e-27	1.64806	0.952	0.869	8.1744e-23	9	Sec61g
Fech	3.92504e-27	2.65427	0.323	0.037	1.09854e-22	9	Fech
Hmgb1	7.07111e-27	0.718376	0.806	0.887	1.97906e-22	9	Hmgb1
Lockd.1	1.44888e-26	1.2167	0.694	0.123	4.05513e-22	9	Lockd
Ube2l6	2.11177e-25	3.17859	0.29	0.003	5.91041e-21	9	Ube2l6
Dek	3.06738e-25	1.05347	0.726	0.447	8.58497e-21	9	Dek
Rpl36	5.09419e-25	-0.449236	0.903	1	1.42576e-20	9	Rpl36
Rrm2	2.54597e-24	0.845671	0.403	0.015	7.12567e-20	9	Rrm2
Gm9843	2.67525e-24	-0.558879	0.806	0.997	7.48748e-20	9	Gm9843
Cenpw	3.38225e-24	0.698824	0.597	0.069	9.46625e-20	9	Cenpw
H2afz.3	4.59193e-24	0.645872	0.903	0.985	1.28519e-19	9	H2afz
Fam220a	4.78497e-24	2.22758	0.371	0.115	1.33922e-19	9	Fam220a
Rpl38.1	8.58265e-24	-0.420491	0.952	0.999	2.40211e-19	9	Rpl38
Cdca3	7.69755e-23	1.17575	0.435	0.028	2.15439e-18	9	Cdca3
Isca1	1.45171e-22	1.89107	0.371	0.135	4.06305e-18	9	Isca1
Oaz1	1.71543e-22	0.870705	0.968	0.984	4.80114e-18	9	Oaz1
Btg1	1.89854e-22	-0.886493	0.726	0.976	5.31362e-18	9	Btg1
Cenpf	3.54092e-22	0.740039	0.339	0.008	9.91032e-18	9	Cenpf
Tcf19	8.20941e-22	0.511287	0.419	0.025	2.29765e-17	9	Tcf19
Ccnb2	2.311e-21	1.18109	0.387	0.028	6.46803e-17	9	Ccnb2
Neil3	4.09819e-21	0.581605	0.274	0.002	1.147e-16	9	Neil3
Nuf2	1.52781e-20	0.425842	0.258	0.001	4.27603e-16	9	Nuf2
Cit	2.41234e-20	0.445142	0.323	0.009	6.75165e-16	9	Cit
Prdx2.1	2.42066e-20	2.11072	0.661	0.325	6.77494e-16	9	Prdx2
Blvrb	2.56161e-20	1.61724	0.306	0.054	7.16944e-16	9	Blvrb
2019-03-02	4.81735e-20	1.50745	0.5	0.226	1.34828e-15	9	2019-03-02
Cdca8	8.15854e-20	0.824112	0.371	0.023	2.28341e-15	9	Cdca8
Clspn	1.22637e-19	0.374357	0.29	0.007	3.43236e-15	9	Clspn
Tmsb10	2.04982e-19	-0.330693	0.903	1	5.73704e-15	9	Tmsb10
H2afv.1	2.29731e-19	0.874171	0.758	0.56	6.42971e-15	9	H2afv
Spc24	2.52861e-19	0.656567	0.468	0.046	7.07706e-15	9	Spc24
Ppp1cb	2.95064e-19	1.84295	0.597	0.268	8.25825e-15	9	Ppp1cb
Bnip3l	2.99179e-19	1.71854	0.548	0.37	8.37342e-15	9	Bnip3l
Txn1	3.86265e-19	0.6832	0.823	0.702	1.08108e-14	9	Txn1
Sgol1	5.43848e-19	0.484151	0.258	0.003	1.52212e-14	9	Sgol1
Ccna2	8.28196e-19	0.910439	0.323	0.016	2.31795e-14	9	Ccna2
Gypa	8.29807e-19	2.30375	0.21	0.001	2.32246e-14	9	Gypa
Atpif1	8.50812e-19	1.19086	0.661	0.364	2.38125e-14	9	Atpif1
Fau	9.07912e-19	-0.344734	0.968	1	2.54106e-14	9	Fau
Tyms	2.371e-18	0.576887	0.452	0.046	6.63595e-14	9	Tyms
Gmnn	3.93378e-18	0.717184	0.468	0.052	1.10099e-13	9	Gmnn
Cdc20	1.32566e-17	0.944175	0.339	0.021	3.71026e-13	9	Cdc20
Cdk1	1.3801e-17	0.732514	0.339	0.02	3.86262e-13	9	Cdk1
Lig1	1.48094e-17	0.823953	0.468	0.06	4.14487e-13	9	Lig1
Ppia	2.19363e-17	0.514913	0.952	0.995	6.13954e-13	9	Ppia
Ran.1	2.38806e-17	0.754526	0.839	0.641	6.68371e-13	9	Ran
Rpl23a-ps3	2.52931e-17	-0.392884	0.839	0.999	7.07904e-13	9	Rpl23a-ps3
Spc25	2.66425e-17	0.521881	0.29	0.01	7.45671e-13	9	Spc25
Tk1	3.12787e-17	0.511442	0.306	0.013	8.75428e-13	9	Tk1
Ckap2l	5.03423e-17	0.537816	0.226	0.002	1.40898e-12	9	Ckap2l
Cdkn3	5.41023e-17	0.708809	0.29	0.01	1.51421e-12	9	Cdkn3
Asf1b	7.18829e-17	0.639923	0.371	0.028	2.01186e-12	9	Asf1b
Lmnb1	7.29974e-17	0.562241	0.452	0.054	2.04305e-12	9	Lmnb1
Ube2s	9.69587e-17	0.955023	0.726	0.403	2.71368e-12	9	Ube2s
Rec114	1.27688e-16	1.63181	0.177	0	3.57373e-12	9	Rec114
Isg20	2.12947e-16	1.78922	0.194	0.012	5.95995e-12	9	Isg20
Prc1	2.30733e-16	0.571619	0.29	0.012	6.45775e-12	9	Prc1
Ncapg2	3.30742e-16	0.288953	0.226	0.004	9.2568e-12	9	Ncapg2
Mcm5	4.65652e-16	0.593078	0.452	0.06	1.30327e-11	9	Mcm5
Ncapd2	4.85701e-16	0.567578	0.339	0.023	1.35938e-11	9	Ncapd2
Rbm3	5.8541e-16	0.490946	0.919	0.947	1.63845e-11	9	Rbm3
Hmmr	1.02009e-15	0.433774	0.21	0.002	2.85502e-11	9	Hmmr
Cenpa	1.56017e-15	1.16383	0.403	0.126	4.36662e-11	9	Cenpa
Rnaseh2b	1.83457e-15	0.506376	0.468	0.073	5.13459e-11	9	Rnaseh2b
Kif22	2.05356e-15	0.387859	0.274	0.011	5.74751e-11	9	Kif22
Gm10073.1	2.20167e-15	-0.365884	0.758	0.993	6.16205e-11	9	Gm10073
Gm10282	2.97761e-15	0.609409	0.452	0.064	8.33373e-11	9	Gm10282
Mxd3	3.82305e-15	0.391527	0.274	0.013	1.06999e-10	9	Mxd3
Rpl27-ps3	4.07214e-15	-0.489678	0.758	0.981	1.13971e-10	9	Rpl27-ps3
St3gal5	4.08618e-15	1.09731	0.194	0.001	1.14364e-10	9	St3gal5
Rpl27	4.13774e-15	-0.354255	0.919	0.999	1.15807e-10	9	Rpl27
Ndc80	5.24624e-15	0.309444	0.258	0.011	1.46832e-10	9	Ndc80
Carhsp1	5.90674e-15	1.09694	0.468	0.082	1.65318e-10	9	Carhsp1
Nrm	5.94777e-15	0.639681	0.468	0.073	1.66466e-10	9	Nrm
Gadd45a	7.96065e-15	1.3052	0.226	0.058	2.22803e-10	9	Gadd45a
Rpl36-ps3.2	8.28305e-15	-0.661766	0.71	0.944	2.31826e-10	9	Rpl36-ps3
Rrm1	1.17547e-14	0.729826	0.355	0.037	3.2899e-10	9	Rrm1
Cenpm	1.37426e-14	0.352882	0.306	0.022	3.84629e-10	9	Cenpm
Cks2	1.52377e-14	1.19106	0.548	0.187	4.26472e-10	9	Cks2
Kif11	1.94051e-14	0.370676	0.226	0.006	5.43109e-10	9	Kif11
Cks1brt	2.34213e-14	0.421021	0.274	0.014	6.55517e-10	9	Cks1brt
Rps21	2.7886e-14	-0.359447	0.903	0.999	7.80473e-10	9	Rps21
Fam210b	3.0871e-14	0.80773	0.129	0.067	8.64018e-10	9	Fam210b
Gm9493.1	3.20163e-14	-0.36039	0.774	0.993	8.96071e-10	9	Gm9493
Hist1h2ae	3.63327e-14	0.598399	0.274	0.015	1.01688e-09	9	Hist1h2ae
Rpl37a	3.81905e-14	-0.288315	0.968	1	1.06888e-09	9	Rpl37a
Smc2	4.25765e-14	0.890133	0.435	0.076	1.19163e-09	9	Smc2
Slc25a37	4.37655e-14	1.86673	0.194	0.034	1.22491e-09	9	Slc25a37
Casc5	4.78796e-14	0.349643	0.226	0.007	1.34005e-09	9	Casc5
Ubb.1	5.51713e-14	0.995207	1	0.993	1.54413e-09	9	Ubb
Dcaf12	6.53178e-14	1.1438	0.226	0.11	1.82811e-09	9	Dcaf12
Anp32b	7.3481e-14	0.708911	0.742	0.572	2.05659e-09	9	Anp32b
Rpl34	1.0501e-13	-0.319148	0.952	0.999	2.93902e-09	9	Rpl34
Incenp	1.22331e-13	0.754726	0.355	0.038	3.4238e-09	9	Incenp
Dnajc9	1.24894e-13	0.583719	0.597	0.155	3.49554e-09	9	Dnajc9
Rps28.1	1.31803e-13	-0.278988	0.903	1	3.6889e-09	9	Rps28
Diaph3	1.34882e-13	0.403077	0.194	0.003	3.77507e-09	9	Diaph3
Bcl2.2	1.4189e-13	-0.775241	0.565	0.819	3.97123e-09	9	Bcl2
Junb.2	1.8228e-13	-0.651719	0.887	0.973	5.10166e-09	9	Junb
Tmpo	2.06812e-13	0.720594	0.581	0.148	5.78825e-09	9	Tmpo
Ncaph	2.34381e-13	0.281792	0.242	0.013	6.55984e-09	9	Ncaph
Rpl9-ps6	2.53562e-13	-0.37165	0.774	0.987	7.0967e-09	9	Rpl9-ps6
Rmi2	2.54552e-13	0.359367	0.242	0.01	7.1244e-09	9	Rmi2
Rad51ap1	3.9387e-13	0.253561	0.21	0.007	1.10236e-08	9	Rad51ap1
Slc25a39	4.37582e-13	1.1722	0.274	0.107	1.2247e-08	9	Slc25a39
Tmem256	4.46323e-13	0.974146	0.79	0.417	1.24917e-08	9	Tmem256
Hist1h2af	5.42335e-13	0.400943	0.177	0.002	1.51789e-08	9	Hist1h2af
Glrx5.1	5.49508e-13	1.40067	0.468	0.242	1.53796e-08	9	Glrx5
Aurkb	5.50469e-13	0.364287	0.21	0.006	1.54065e-08	9	Aurkb
Uhrf1	5.78638e-13	0.40649	0.258	0.015	1.61949e-08	9	Uhrf1
Dut	6.2703e-13	0.832258	0.565	0.227	1.75493e-08	9	Dut
Esco2	6.35538e-13	0.279188	0.177	0.002	1.77874e-08	9	Esco2
Dck	6.43729e-13	0.451967	0.339	0.039	1.80167e-08	9	Dck
Fam213a	6.63459e-13	1.62539	0.145	0.01	1.85689e-08	9	Fam213a
Hint1	9.16376e-13	0.44276	0.823	0.832	2.56475e-08	9	Hint1
1810058I24Rik.1	1.27099e-12	1.21601	0.629	0.507	3.55725e-08	9	1810058I24Rik
Racgap1	1.6072e-12	0.468556	0.419	0.075	4.49823e-08	9	Racgap1
Pcna	1.62925e-12	0.904272	0.581	0.25	4.55996e-08	9	Pcna
Gm42418.1	2.25487e-12	1.32535	0.887	0.657	6.31093e-08	9	Gm42418
Rps14	2.6941e-12	-0.257241	0.984	1	7.54025e-08	9	Rps14
Rps12-ps3.1	2.70836e-12	-0.250448	0.79	0.993	7.58015e-08	9	Rps12-ps3
Whsc1	3.34832e-12	0.406866	0.419	0.085	9.37128e-08	9	Whsc1
Fbxo5	3.73719e-12	0.394042	0.226	0.01	1.04596e-07	9	Fbxo5
Shisa5	3.87099e-12	-0.594489	0.79	0.965	1.08341e-07	9	Shisa5
Rnf10	3.94507e-12	1.49639	0.532	0.214	1.10415e-07	9	Rnf10
Rsad2	4.34996e-12	1.95448	0.177	0.005	1.21747e-07	9	Rsad2
Cenpe	4.35587e-12	0.304934	0.226	0.011	1.21912e-07	9	Cenpe
Fkbp2	4.56511e-12	0.418908	0.532	0.148	1.27768e-07	9	Fkbp2
Rpl37	1.0871e-11	-0.267708	0.935	1	3.04257e-07	9	Rpl37
Tpx2	1.68547e-11	0.470479	0.226	0.013	4.71729e-07	9	Tpx2
Nkg7.2	1.73497e-11	-0.352177	0.871	0.999	4.85582e-07	9	Nkg7
Tfdp2	1.92084e-11	1.0994	0.226	0.045	5.37606e-07	9	Tfdp2
Pfn1	2.00102e-11	-0.252471	0.871	0.999	5.60047e-07	9	Pfn1
Hist1h1b	2.37441e-11	0.454056	0.177	0.004	6.64549e-07	9	Hist1h1b
Hagh	2.48529e-11	0.998586	0.274	0.088	6.95584e-07	9	Hagh
Creg1	2.84776e-11	0.989853	0.258	0.097	7.97032e-07	9	Creg1
Ftl1	2.92539e-11	1.08528	1	0.979	8.18759e-07	9	Ftl1
Ccdc34	2.96404e-11	0.530113	0.371	0.06	8.29576e-07	9	Ccdc34
Ppil1	3.2234e-11	0.26361	0.387	0.096	9.02164e-07	9	Ppil1
Gabarapl2.1	3.46672e-11	1.07871	0.71	0.603	9.70265e-07	9	Gabarapl2
Tacc3	3.67911e-11	0.342629	0.226	0.013	1.02971e-06	9	Tacc3
Rps24.1	5.27213e-11	-0.25616	0.968	1	1.47556e-06	9	Rps24
Hells	5.31301e-11	0.50884	0.306	0.037	1.48701e-06	9	Hells
S100a9.4	5.67105e-11	1.17403	0.726	0.476	1.58721e-06	9	S100a9
Gm11808.1	6.13982e-11	-0.308931	0.823	0.992	1.71841e-06	9	Gm11808
B2m.1	6.17438e-11	-0.292774	0.935	1	1.72808e-06	9	B2m
Anp32e	6.75068e-11	0.849667	0.597	0.193	1.88938e-06	9	Anp32e
Cd36	7.07499e-11	0.825623	0.113	0	1.98015e-06	9	Cd36
Slc4a1	7.07499e-11	1.48994	0.113	0	1.98015e-06	9	Slc4a1
Lmo2	9.3018e-11	0.739685	0.129	0.001	2.60339e-06	9	Lmo2
Pnpo	1.0296e-10	1.17946	0.226	0.07	2.88166e-06	9	Pnpo
Rps18-ps3.1	1.42286e-10	-0.487647	0.71	0.954	3.98231e-06	9	Rps18-ps3
Kif23	1.80679e-10	0.497523	0.177	0.007	5.05684e-06	9	Kif23
Slc29a1	1.8194e-10	0.315269	0.306	0.046	5.09213e-06	9	Slc29a1
Dhfr	1.86004e-10	0.349588	0.242	0.02	5.20588e-06	9	Dhfr
Wdr89	2.22293e-10	-0.291804	0.887	0.998	6.22155e-06	9	Wdr89
Pbk	2.62812e-10	0.428065	0.177	0.007	7.35557e-06	9	Pbk
Ttk	2.89071e-10	0.426408	0.145	0.002	8.09051e-06	9	Ttk
Csrp1	2.95046e-10	0.474372	0.452	0.11	8.25774e-06	9	Csrp1
Mad2l1	3.08943e-10	0.267027	0.242	0.027	8.64671e-06	9	Mad2l1
Trim10	3.23309e-10	1.20715	0.129	0.003	9.04878e-06	9	Trim10
Tubb4b	3.73936e-10	1.02454	0.613	0.359	1.04657e-05	9	Tubb4b
Rpl30.1	4.44905e-10	-0.328593	0.952	0.999	1.2452e-05	9	Rpl30
Smc4	4.53581e-10	0.836306	0.565	0.228	1.26948e-05	9	Smc4
Pttg1	4.9744e-10	0.90308	0.242	0.164	1.39223e-05	9	Pttg1
Orc6	4.99367e-10	0.293312	0.306	0.056	1.39763e-05	9	Orc6
Ccndbp1.1	5.23951e-10	1.23686	0.403	0.19	1.46643e-05	9	Ccndbp1
Adipor1	5.58597e-10	1.06247	0.516	0.373	1.5634e-05	9	Adipor1
Mcm7	6.12406e-10	0.558288	0.387	0.078	1.714e-05	9	Mcm7
Cbx5	7.75332e-10	0.429638	0.339	0.058	2.17e-05	9	Cbx5
Cmc2	1.00184e-09	0.395875	0.435	0.12	2.80396e-05	9	Cmc2
E2f2	1.04998e-09	0.557299	0.226	0.019	2.93868e-05	9	E2f2
Dtl	1.10089e-09	0.385181	0.323	0.055	3.08117e-05	9	Dtl
Ccnb1	1.1817e-09	0.491398	0.177	0.008	3.30735e-05	9	Ccnb1
Ccnf	1.18675e-09	0.284349	0.129	0.001	3.32147e-05	9	Ccnf
Pola1	1.25044e-09	0.441544	0.242	0.024	3.49974e-05	9	Pola1
Txk.1	1.28812e-09	-0.684086	0.613	0.801	3.60518e-05	9	Txk
Mcm3	1.30042e-09	0.426994	0.306	0.046	3.63961e-05	9	Mcm3
Tipin	1.4541e-09	0.757397	0.452	0.124	4.06975e-05	9	Tipin
Nup62	1.5132e-09	0.405266	0.339	0.064	4.23515e-05	9	Nup62
Mpp1	1.5355e-09	0.95507	0.274	0.067	4.29756e-05	9	Mpp1
Bola3	1.81494e-09	0.98544	0.565	0.334	5.07964e-05	9	Bola3
Hist1h2bj	1.98059e-09	0.34233	0.21	0.016	5.54328e-05	9	Hist1h2bj
2019-03-05	2.54696e-09	0.917745	0.274	0.091	7.12842e-05	9	2019-03-05
Dctpp1.1	2.68285e-09	0.334992	0.435	0.133	7.50877e-05	9	Dctpp1
Snrpd1	2.79298e-09	0.66321	0.71	0.396	7.817e-05	9	Snrpd1
Ubac1	2.9845e-09	0.625215	0.129	0.055	8.35301e-05	9	Ubac1
Hnrnpab.1	3.5831e-09	0.588923	0.758	0.367	0.000100284	9	Hnrnpab
A430005L14Rik	4.05236e-09	0.367525	0.435	0.128	0.000113417	9	A430005L14Rik
Ncapd3	4.16199e-09	0.345632	0.323	0.065	0.000116486	9	Ncapd3
Ptprc.1	4.4441e-09	-0.508379	0.71	0.915	0.000124381	9	Ptprc
Tecpr1.1	5.16487e-09	-0.674646	0.161	0.397	0.000144554	9	Tecpr1
Ctse	5.52417e-09	0.877178	0.113	0.032	0.00015461	9	Ctse
Ltb.5	6.77375e-09	-0.8816	0.306	0.639	0.000189584	9	Ltb
Fam111a	8.45989e-09	0.293217	0.387	0.117	0.000236776	9	Fam111a
Ifngr1.2	1.00153e-08	-0.643775	0.452	0.693	0.000280308	9	Ifngr1
Snrpe	1.29455e-08	0.410261	0.742	0.735	0.000362317	9	Snrpe
Hist1h2ak	1.43824e-08	0.281655	0.161	0.008	0.000402535	9	Hist1h2ak
Car2.2	1.63972e-08	1.31586	0.758	0.499	0.000458926	9	Car2
Slc48a1	1.64242e-08	1.08023	0.29	0.132	0.000459681	9	Slc48a1
Hist1h2al	1.73184e-08	0.432239	0.177	0.012	0.000484706	9	Hist1h2al
Sbno1	1.87345e-08	-0.283778	0.323	0.299	0.000524341	9	Sbno1
Gapdh	1.90785e-08	0.393027	0.758	0.75	0.000533969	9	Gapdh
Ift20	1.92429e-08	-0.279617	0.435	0.384	0.00053857	9	Ift20
Hmbs	2.25571e-08	1.24491	0.258	0.047	0.000631328	9	Hmbs
Ier2.3	2.95439e-08	-0.505624	0.694	0.802	0.000826876	9	Ier2
Hat1	3.28194e-08	0.2666	0.306	0.072	0.000918549	9	Hat1
Lfng.1	3.39094e-08	-0.429573	0.468	0.518	0.000949057	9	Lfng
AB124611	3.5589e-08	-0.314813	0.387	0.394	0.000996066	9	AB124611
Dtymk	3.80251e-08	0.425362	0.468	0.152	0.00106425	9	Dtymk
Usp1	4.22609e-08	0.308439	0.355	0.095	0.0011828	9	Usp1
Bcl2l1.1	4.3867e-08	1.08781	0.242	0.122	0.00122775	9	Bcl2l1
Pkmyt1	4.39857e-08	0.25375	0.21	0.026	0.00123107	9	Pkmyt1
Fzr1	4.52979e-08	0.449722	0.323	0.066	0.0012678	9	Fzr1
Ucp2.1	4.83103e-08	1.02989	0.871	0.668	0.00135211	9	Ucp2
Apitd1	5.04397e-08	0.269485	0.194	0.018	0.00141171	9	Apitd1
Prex1.2	5.11255e-08	-0.589276	0.226	0.396	0.0014309	9	Prex1
Pmf1	5.55594e-08	0.41661	0.452	0.143	0.001555	9	Pmf1
Pdcd4	6.09703e-08	-0.605819	0.548	0.69	0.00170644	9	Pdcd4
Rfc4	6.46406e-08	0.403579	0.274	0.046	0.00180916	9	Rfc4
AI662270	7.30717e-08	0.757589	0.677	0.325	0.00204513	9	AI662270
Ranbp1.2	7.36527e-08	0.604042	0.645	0.433	0.00206139	9	Ranbp1
Eif4a2	7.50168e-08	-0.482202	0.435	0.513	0.00209957	9	Eif4a2
Nans	8.2982e-08	0.38536	0.548	0.232	0.0023225	9	Nans
Gimap3.2	8.51065e-08	-0.62217	0.403	0.677	0.00238196	9	Gimap3
Knstrn	8.96736e-08	0.426924	0.274	0.047	0.00250979	9	Knstrn
Serinc3.2	9.16588e-08	0.758095	0.903	0.733	0.00256535	9	Serinc3
Fam46c	9.50649e-08	1.61039	0.129	0.024	0.00266068	9	Fam46c
Smc3	1.21839e-07	0.449107	0.532	0.2	0.00341003	9	Smc3
Rinl	1.24053e-07	-0.599525	0.387	0.569	0.003472	9	Rinl
Rfc5	1.25394e-07	0.366522	0.274	0.052	0.00350952	9	Rfc5
Peli1.1	1.46038e-07	-0.542394	0.21	0.364	0.00408732	9	Peli1
Fbxo9	1.47345e-07	0.845012	0.242	0.148	0.00412391	9	Fbxo9
Dhrs11	1.47566e-07	0.625356	0.129	0.035	0.00413009	9	Dhrs11
Vim.5	1.53609e-07	0.517381	0.774	0.729	0.00429921	9	Vim
Zcchc11	1.57457e-07	-0.267857	0.387	0.351	0.00440691	9	Zcchc11
Pabpc1	1.57942e-07	0.697976	0.952	0.927	0.00442048	9	Pabpc1
Rpl5	1.59042e-07	-0.267525	0.903	0.994	0.00445126	9	Rpl5
AY036118.1	1.72948e-07	1.20736	0.694	0.417	0.00484046	9	AY036118
Ccnl1.1	1.73094e-07	-0.27491	0.403	0.391	0.00484455	9	Ccnl1
Nabp1.1	1.8216e-07	-0.582481	0.194	0.355	0.0050983	9	Nabp1
Kifc1	1.83057e-07	0.296275	0.129	0.005	0.0051234	9	Kifc1
Siva1	1.87852e-07	0.543371	0.452	0.153	0.0052576	9	Siva1
1700097N02Rik	1.92745e-07	0.264605	0.242	0.045	0.00539456	9	1700097N02Rik
Rnf26	1.96763e-07	0.569755	0.258	0.043	0.00550701	9	Rnf26
Gins2	2.09028e-07	0.295767	0.161	0.012	0.00585029	9	Gins2
Ezh2	2.09574e-07	0.44543	0.371	0.1	0.00586555	9	Ezh2
Cenpl	2.4455e-07	0.282226	0.21	0.031	0.00684447	9	Cenpl
Cd27.1	2.56762e-07	-0.578431	0.419	0.572	0.00718625	9	Cd27
Xpo1	2.67219e-07	0.27619	0.306	0.082	0.00747893	9	Xpo1
Nucks1	2.74753e-07	0.577469	0.613	0.296	0.00768978	9	Nucks1
Eif1ax	2.81103e-07	0.299049	0.581	0.28	0.00786751	9	Eif1ax
Tyrobp.2	3.15766e-07	-0.363966	0.952	0.997	0.00883765	9	Tyrobp
Psme3	3.37542e-07	0.788135	0.323	0.16	0.00944712	9	Psme3
Ube2b.1	3.55412e-07	1.0685	0.726	0.471	0.00994727	9	Ube2b
2700094K13Rik	3.66556e-07	0.516383	0.726	0.439	0.0102592	9	2700094K13Rik
Taldo1	4.54063e-07	0.754684	0.694	0.383	0.0127083	9	Taldo1
Urod	5.05529e-07	0.693156	0.242	0.08	0.0141487	9	Urod
Rpl13-ps3	5.72368e-07	-0.37309	0.742	0.941	0.0160194	9	Rpl13-ps3
Nap1l1	5.85448e-07	0.504954	0.694	0.388	0.0163855	9	Nap1l1
Rad23a	6.07061e-07	0.897909	0.468	0.181	0.0169904	9	Rad23a
Grcc10	6.21592e-07	-0.364451	0.532	0.642	0.0173971	9	Grcc10
Snx15	6.27153e-07	0.698658	0.145	0.053	0.0175527	9	Snx15
Xist	6.48475e-07	0.320567	0.823	0.876	0.0181495	9	Xist
Rbmxl1	7.20718e-07	0.325266	0.419	0.154	0.0201714	9	Rbmxl1
Msh5	8.02624e-07	0.25103	0.129	0.007	0.0224638	9	Msh5
Map1lc3b.1	8.33471e-07	0.999835	0.774	0.614	0.0233272	9	Map1lc3b
Fam126a	8.36303e-07	0.719971	0.145	0.049	0.0234065	9	Fam126a
Hcst	8.43388e-07	-0.448074	0.758	0.928	0.0236047	9	Hcst
Rpl28.1	9.31133e-07	0.28868	0.968	0.989	0.0260606	9	Rpl28
Slc25a51	1.12472e-06	0.785894	0.323	0.146	0.0314788	9	Slc25a51
Riok3	1.16128e-06	0.85446	0.258	0.133	0.0325019	9	Riok3
Srsf4	1.19662e-06	0.258949	0.323	0.108	0.0334911	9	Srsf4
Bhlhe40	1.21799e-06	-0.478376	0.435	0.563	0.0340891	9	Bhlhe40
Ptbp1	1.25165e-06	0.297895	0.516	0.236	0.0350313	9	Ptbp1
Spn.1	1.33222e-06	-0.423587	0.403	0.436	0.0372861	9	Spn
Amd1	1.40216e-06	-0.406573	0.355	0.406	0.0392436	9	Amd1
Arf5.1	1.4069e-06	0.788221	0.871	0.685	0.0393762	9	Arf5
Traip	1.41083e-06	0.354731	0.129	0.007	0.0394863	9	Traip
Id2.4	1.46986e-06	-0.53912	0.71	0.906	0.0411384	9	Id2
Rbm39	1.5442e-06	-0.384979	0.79	0.953	0.043219	9	Rbm39
Srpk1.1	1.63558e-06	-0.287955	0.258	0.274	0.0457767	9	Srpk1
Ssrp1	1.69798e-06	0.4424	0.597	0.276	0.047523	9	Ssrp1
