# Supplementary material for: Single-cell transcriptome reveals the novel role of T-bet in suppressing the immature NK gene signature
Source: eLife journal article supplement (doi:10.7554/elife.51339), 2020-05-14
Supplement: supp [file elife-51339-supp-v1.zip › elife_poa_e51339_Supplementary_file_4.xlsx]

## Sheet: TbetWTKO_NK_PCA_markers
Supplementary File 4. DEGs of clusters formed by WT and T-bet-deficient cells (logfc > 0.25; p_val_adj < 0.05). Related to Figure 5.
	p_val	avg_logFC	pct.1	pct.2	p_val_adj	cluster	gene
Pdcd4	2.0905e-17	0.37604	0.66	0.641	5.85089e-13	1	Pdcd4
Abhd2	1.14958e-16	0.435938	0.294	0.185	3.21744e-12	1	Abhd2
Nfkbia	1.75115e-14	-0.428584	0.465	0.702	4.90113e-10	1	Nfkbia
Gas7	4.78422e-14	0.258143	0.241	0.215	1.33901e-09	1	Gas7
Actb	9.53902e-14	0.451161	0.993	0.998	2.66978e-09	1	Actb
Bhlhe40	2.50704e-10	-0.291367	0.287	0.481	7.01671e-06	1	Bhlhe40
Plek	1.8444e-09	-0.25651	0.163	0.322	5.16212e-05	1	Plek
Nfkbiz	8.86294e-09	-0.286245	0.057	0.179	0.000248056	1	Nfkbiz
Spry2	1.29762e-08	0.378611	0.525	0.456	0.000363178	1	Spry2
Dut	1.78056e-08	-0.274518	0.085	0.216	0.000498344	1	Dut
Gpx1	8.44925e-08	-0.551224	0.202	0.353	0.00236478	1	Gpx1
Ccl3	8.60932e-08	-0.625156	0.277	0.445	0.00240958	1	Ccl3
Gpr65	2.49608e-07	-0.260701	0.071	0.187	0.00698603	1	Gpr65
Ms4a4c	4.68591e-07	-0.271026	0.113	0.24	0.0131149	1	Ms4a4c
Prdx2	1.68274e-06	-0.277696	0.23	0.355	0.0470966	1	Prdx2
Rplp0	3.37018e-43	0.291887	1	0.998	9.43247e-39	2	Rplp0
Rpl3	5.76517e-42	0.294405	1	0.997	1.61356e-37	2	Rpl3
Malat1	6.53811e-36	-0.415005	1	0.999	1.82989e-31	2	Malat1
Rpl10	9.33844e-35	0.266666	1	0.998	2.61364e-30	2	Rpl10
Rpl10a	1.08966e-33	0.293054	1	0.99	3.04975e-29	2	Rpl10a
Rpl28	1.18139e-31	0.319007	1	0.985	3.30649e-27	2	Rpl28
Gm8730	1.66447e-31	0.283492	1	0.987	4.65853e-27	2	Gm8730
Serpinb6b	5.45699e-30	0.568525	0.73	0.402	1.5273e-25	2	Serpinb6b
Tmsb10	2.5121e-29	-0.252776	1	0.997	7.03086e-25	2	Tmsb10
Eef2	1.05749e-28	0.292386	0.997	0.979	2.95971e-24	2	Eef2
Ccl3.1	7.30538e-28	0.586054	0.734	0.406	2.04463e-23	2	Ccl3
H2-K1	2.60459e-27	-0.31667	0.993	0.983	7.28971e-23	2	H2-K1
Rpl7a	3.85222e-27	0.274035	1	0.969	1.07816e-22	2	Rpl7a
Rpl10-ps3	1.7448e-24	0.257044	1	0.99	4.88334e-20	2	Rpl10-ps3
Klra4	2.41648e-23	0.655555	0.697	0.459	6.76325e-19	2	Klra4
Id2	6.34816e-23	-0.410734	0.852	0.879	1.77672e-18	2	Id2
H2-Q7	2.54529e-22	-0.361068	0.812	0.82	7.12375e-18	2	H2-Q7
Hspa8	3.83075e-22	0.295022	0.997	0.925	1.07215e-17	2	Hspa8
Actg1	2.53331e-21	0.283902	1	0.987	7.09024e-17	2	Actg1
Zfos1	5.37736e-20	0.360536	0.684	0.405	1.50502e-15	2	Zfos1
Thy1	4.4361e-18	-0.527087	0.378	0.568	1.24158e-13	2	Thy1
H2-Oa	5.01662e-18	0.326805	0.234	0.064	1.40405e-13	2	H2-Oa
Ly6e	1.30953e-15	-0.30319	0.786	0.791	3.66511e-11	2	Ly6e
Hnrnpa1	2.05792e-14	0.287425	0.812	0.595	5.7597e-10	2	Hnrnpa1
Skap1	2.70302e-14	-0.27855	0.648	0.669	7.56521e-10	2	Skap1
Vim	4.1657e-14	0.356861	0.855	0.661	1.1659e-09	2	Vim
Fth1	7.52229e-14	-0.269391	0.964	0.96	2.10534e-09	2	Fth1
Slc25a4	1.27866e-13	0.294914	0.628	0.4	3.57871e-09	2	Slc25a4
Pycard	3.29515e-13	0.297142	0.855	0.662	9.22248e-09	2	Pycard
Serpina3g	6.29667e-13	-0.409594	0.431	0.511	1.76231e-08	2	Serpina3g
Rabac1	7.63977e-13	-0.360399	0.526	0.604	2.13822e-08	2	Rabac1
Hmgb2	1.35714e-12	-0.311658	0.862	0.746	3.79836e-08	2	Hmgb2
Ppp1r15a	1.58704e-12	-0.252902	0.401	0.387	4.44182e-08	2	Ppp1r15a
Klf6	2.09569e-12	-0.294369	0.418	0.426	5.86541e-08	2	Klf6
Cycs	3.44228e-12	-0.311807	0.48	0.538	9.63425e-08	2	Cycs
H2afj	6.58515e-12	-0.255871	0.753	0.764	1.84305e-07	2	H2afj
Xcl1	6.72885e-12	-0.455189	0.72	0.802	1.88327e-07	2	Xcl1
Ccnd3	2.7748e-11	-0.261291	0.516	0.541	7.7661e-07	2	Ccnd3
Ltb	3.8279e-11	-0.42793	0.493	0.593	1.07135e-06	2	Ltb
Ybx1	4.82277e-11	-0.304895	0.342	0.428	1.3498e-06	2	Ybx1
Ms4a4c.1	1.09334e-10	-0.402989	0.135	0.239	3.06003e-06	2	Ms4a4c
Cd82	1.31571e-10	-0.358802	0.289	0.384	3.68242e-06	2	Cd82
Tuba1b.1	1.89727e-10	-0.615142	0.332	0.381	5.31007e-06	2	Tuba1b
Txk	2.50436e-10	-0.280736	0.645	0.654	7.0092e-06	2	Txk
Ncr1	3.4554e-10	-0.273303	0.678	0.708	9.67097e-06	2	Ncr1
Tubb5	3.60489e-10	-0.262182	0.684	0.577	1.00894e-05	2	Tubb5
Btg1	3.94219e-10	-0.274399	0.928	0.915	1.10334e-05	2	Btg1
Cd28	6.47976e-10	-0.341963	0.375	0.444	1.81356e-05	2	Cd28
Plac8.1	7.15887e-10	0.368356	0.24	0.104	2.00362e-05	2	Plac8
Cd3g	7.84361e-10	-0.563596	0.109	0.232	2.19527e-05	2	Cd3g
Tubb4b	1.24792e-09	-0.283704	0.306	0.316	3.49268e-05	2	Tubb4b
Ccnd2	4.97326e-09	-0.268109	0.595	0.615	0.000139192	2	Ccnd2
S100a6	5.83536e-09	-0.439832	0.444	0.575	0.00016332	2	S100a6
Ranbp1	7.74659e-09	-0.252301	0.441	0.476	0.000216811	2	Ranbp1
Nucks1	2.38502e-08	-0.250556	0.283	0.335	0.00066752	2	Nucks1
Cst7	5.04117e-08	-0.26704	0.395	0.45	0.00141092	2	Cst7
Klrc1	6.96461e-08	-0.355628	0.352	0.458	0.00194926	2	Klrc1
Stmn1.1	1.2731e-07	-0.366429	0.207	0.178	0.00356316	2	Stmn1
Klf2	7.63695e-07	-0.298697	0.135	0.211	0.0213743	2	Klf2
Vps37b	1.42377e-57	0.742278	0.783	0.523	3.98483e-53	3	Vps37b
Nfkbia.1	4.09415e-45	0.692102	0.864	0.667	1.14587e-40	3	Nfkbia
Ccl4.1	1.43742e-41	1.05818	0.712	0.479	4.02305e-37	3	Ccl4
Junb	2.05783e-40	0.515209	0.981	0.952	5.75944e-36	3	Junb
H3f3b	1.20626e-29	0.365985	0.997	0.99	3.37608e-25	3	H3f3b
Pim1	1.63795e-28	0.518118	0.854	0.745	4.5843e-24	3	Pim1
Btg2	1.93751e-28	0.493308	0.783	0.645	5.42271e-24	3	Btg2
Rps20	3.75276e-27	-0.29278	0.988	0.994	1.05032e-22	3	Rps20
Nr4a1	6.43261e-27	0.580283	0.288	0.121	1.80036e-22	3	Nr4a1
Ier2	2.14692e-26	0.465456	0.728	0.616	6.00879e-22	3	Ier2
Ifrd1	2.19414e-26	0.521707	0.31	0.155	6.14095e-22	3	Ifrd1
Ccl5	4.44108e-26	0.38936	1	0.997	1.24297e-21	3	Ccl5
Irf8	9.12757e-26	0.547661	0.625	0.475	2.55462e-21	3	Irf8
Tnfaip3	1.36668e-25	0.533081	0.492	0.319	3.82505e-21	3	Tnfaip3
Btg1.1	1.42644e-24	0.389071	0.96	0.911	3.99232e-20	3	Btg1
Ccl3.2	1.94693e-24	0.793564	0.616	0.415	5.44907e-20	3	Ccl3
Gzma	2.06788e-24	0.525764	0.938	0.85	5.78757e-20	3	Gzma
Dusp1	2.76194e-24	0.511319	0.585	0.396	7.73011e-20	3	Dusp1
Nfkbiz.1	1.27073e-23	0.506562	0.3	0.158	3.55651e-19	3	Nfkbiz
Rps2	2.86471e-23	-0.259975	0.991	0.994	8.01775e-19	3	Rps2
Nr4a2	5.71051e-23	0.466785	0.483	0.359	1.59826e-18	3	Nr4a2
Rpl35	3.92196e-21	-0.254304	0.981	0.986	1.09768e-16	3	Rpl35
Ifng.1	6.36565e-20	0.600288	0.477	0.299	1.78162e-15	3	Ifng
Tgif1	2.07157e-19	0.456875	0.232	0.104	5.79792e-15	3	Tgif1
Csrnp1	3.4933e-19	0.394011	0.226	0.12	9.77706e-15	3	Csrnp1
Zfp36l2	4.57907e-19	0.406596	0.598	0.522	1.28159e-14	3	Zfp36l2
Bhlhe40.1	4.65816e-19	0.406465	0.563	0.457	1.30373e-14	3	Bhlhe40
Neurl3	9.88824e-19	0.417518	0.353	0.24	2.76752e-14	3	Neurl3
Ypel3	1.08455e-18	0.383123	0.675	0.582	3.03544e-14	3	Ypel3
Gm2000	3.53671e-18	-0.32002	0.82	0.921	9.89854e-14	3	Gm2000
Serpinb9	1.07353e-17	0.43202	0.44	0.29	3.00461e-13	3	Serpinb9
Ubc	2.48788e-17	0.301813	0.678	0.661	6.96308e-13	3	Ubc
Gimap5	3.9464e-17	0.296695	0.737	0.685	1.10452e-12	3	Gimap5
Rgs2	8.69609e-17	0.412423	0.567	0.465	2.43386e-12	3	Rgs2
Ifngr1	9.56775e-17	0.364718	0.693	0.615	2.67782e-12	3	Ifngr1
Nme1	1.13583e-16	-0.374224	0.427	0.672	3.17896e-12	3	Nme1
Ppp1r15a.1	2.14971e-16	0.381556	0.492	0.378	6.01661e-12	3	Ppp1r15a
Gem	5.54958e-16	0.365354	0.502	0.433	1.55322e-11	3	Gem
Traf1	1.22648e-15	0.295445	0.418	0.39	3.43268e-11	3	Traf1
Zcchc11	1.38339e-15	0.266655	0.328	0.305	3.87184e-11	3	Zcchc11
Vgll4	1.64408e-15	0.30784	0.533	0.514	4.60146e-11	3	Vgll4
Ly6e.1	2.0344e-15	-0.353625	0.607	0.808	5.69387e-11	3	Ly6e
Sqstm1	2.13015e-15	0.374569	0.39	0.277	5.96188e-11	3	Sqstm1
Mxd1	3.08289e-15	0.3944	0.288	0.17	8.62841e-11	3	Mxd1
Dusp5	3.64136e-15	0.364123	0.368	0.245	1.01914e-10	3	Dusp5
Pik3r1	3.76017e-15	0.302739	0.458	0.394	1.0524e-10	3	Pik3r1
Arl5c	5.7482e-15	0.353857	0.223	0.153	1.60881e-10	3	Arl5c
Gadd45b	2.41979e-14	0.392146	0.183	0.084	6.77252e-10	3	Gadd45b
Gramd3	6.39432e-14	0.370441	0.155	0.061	1.78964e-09	3	Gramd3
Spry2.1	6.58695e-14	0.510777	0.545	0.454	1.84355e-09	3	Spry2
Gimap6	7.25516e-14	0.275578	0.817	0.771	2.03058e-09	3	Gimap6
Itga4	2.52618e-13	0.279624	0.43	0.389	7.07027e-09	3	Itga4
Kdm6b	9.16819e-13	0.402731	0.325	0.212	2.56599e-08	3	Kdm6b
Nabp1	2.13415e-12	0.283631	0.322	0.266	5.97307e-08	3	Nabp1
Plek.1	2.19863e-12	0.283744	0.359	0.305	6.15353e-08	3	Plek
Ptpn22	2.38927e-12	0.26315	0.486	0.452	6.68709e-08	3	Ptpn22
Klrc2	2.65589e-12	0.255677	0.48	0.47	7.4333e-08	3	Klrc2
Runx1	3.05147e-12	0.341196	0.229	0.12	8.54047e-08	3	Runx1
Cd3g.1	3.302e-12	-0.561355	0.077	0.235	9.24164e-08	3	Cd3g
Rel	3.33574e-12	0.330643	0.207	0.113	9.33607e-08	3	Rel
Tagap	3.57612e-12	0.312276	0.158	0.073	1.00088e-07	3	Tagap
Pim3	9.81169e-12	0.297309	0.248	0.172	2.7461e-07	3	Pim3
Nfkbid	1.72925e-11	0.285298	0.152	0.086	4.83982e-07	3	Nfkbid
Zfp36	2.31395e-11	0.26616	0.353	0.309	6.4763e-07	3	Zfp36
Litaf	3.36971e-11	0.266814	0.17	0.099	9.43113e-07	3	Litaf
Eef1g	3.45124e-11	-0.265542	0.836	0.921	9.65934e-07	3	Eef1g
Serpinb6b.1	4.008e-11	0.310345	0.492	0.423	1.12176e-06	3	Serpinb6b
Hif1a	6.30042e-11	0.250115	0.176	0.125	1.76336e-06	3	Hif1a
Clk1	6.55921e-11	0.262212	0.511	0.448	1.83579e-06	3	Clk1
Ms4a4c.2	1.53346e-10	-0.345929	0.093	0.243	4.29183e-06	3	Ms4a4c
Cirbp	1.74634e-10	0.273496	0.517	0.442	4.88766e-06	3	Cirbp
Cd3d.1	2.38388e-10	-0.508983	0.074	0.213	6.67201e-06	3	Cd3d
Tubb5.1	3.11095e-10	-0.505049	0.412	0.603	8.70692e-06	3	Tubb5
Fos	4.77339e-10	-0.313155	0.276	0.457	1.33598e-05	3	Fos
Cdkn1a	4.97261e-10	0.346739	0.155	0.08	1.39173e-05	3	Cdkn1a
Tuba1b.2	5.17738e-10	-0.611863	0.217	0.392	1.44904e-05	3	Tuba1b
Mif	5.51395e-10	-0.28243	0.381	0.57	1.54324e-05	3	Mif
2019-03-07	1.23267e-09	0.251758	0.235	0.179	3.45001e-05	3	2019-03-07
Thy1.1	1.35977e-09	-0.30046	0.384	0.569	3.80572e-05	3	Thy1
Ccng2	2.3033e-09	0.253721	0.146	0.078	6.44646e-05	3	Ccng2
Lamb3	2.73335e-09	0.256297	0.269	0.219	7.65011e-05	3	Lamb3
Anxa1	2.77905e-09	0.257256	0.347	0.293	7.77799e-05	3	Anxa1
Cks1b	3.00901e-09	-0.324556	0.022	0.118	8.42163e-05	3	Cks1b
Foxn3	3.63151e-09	0.260091	0.142	0.08	0.000101639	3	Foxn3
Ltb.1	7.12987e-09	-0.251679	0.424	0.6	0.000199551	3	Ltb
Bst2	9.559e-09	-0.276482	0.087	0.213	0.000267537	3	Bst2
Prdx2.1	1.97837e-08	-0.356136	0.211	0.359	0.000553706	3	Prdx2
As3mt	3.00499e-08	0.270148	0.204	0.13	0.000841037	3	As3mt
Borcs7	6.60923e-08	0.304798	0.263	0.177	0.00184979	3	Borcs7
Sgk1	7.24982e-08	0.310265	0.152	0.094	0.00202908	3	Sgk1
Pim2	1.40134e-07	-0.25493	0.152	0.284	0.00392206	3	Pim2
Rnf125	1.4182e-07	0.251849	0.164	0.091	0.00396927	3	Rnf125
Tbx21	4.25095e-07	0.257669	0.142	0.065	0.0118976	3	Tbx21
Rgs1	5.5908e-07	0.278969	0.359	0.297	0.0156475	3	Rgs1
Hes1	1.01113e-06	0.271158	0.13	0.094	0.0282995	3	Hes1
Gzma.1	8.62007e-128	0.990108	0.99	0.831	2.41259e-123	4	Gzma
Xcl1.1	1.05836e-74	-0.747055	0.503	0.852	2.96214e-70	4	Xcl1
Rps20.1	3.11872e-71	-0.322476	0.984	0.995	8.72867e-67	4	Rps20
Ltb.2	2.43144e-70	-0.780707	0.258	0.649	6.80511e-66	4	Ltb
Cma1	9.49991e-69	0.884409	0.288	0.056	2.65884e-64	4	Cma1
Rpl35.1	1.87781e-58	-0.329655	0.957	0.991	5.25561e-54	4	Rpl35
Emb	1.7182e-54	-0.396875	0.232	0.549	4.80889e-50	4	Emb
Malat1.1	4.76337e-53	0.34573	1	0.998	1.33317e-48	4	Malat1
Ly6e.2	7.35182e-53	-0.432422	0.539	0.84	2.05763e-48	4	Ly6e
Thy1.2	7.38127e-53	-0.529066	0.271	0.608	2.06587e-48	4	Thy1
Irf8.1	2.18648e-52	0.594353	0.587	0.469	6.11952e-48	4	Irf8
Tmem234	2.64538e-51	0.301096	0.515	0.538	7.40388e-47	4	Tmem234
Fos.1	4.56549e-50	-0.504511	0.183	0.492	1.27779e-45	4	Fos
Borcs7.1	6.59614e-49	0.585194	0.296	0.162	1.84613e-44	4	Borcs7
Ier2.1	6.54979e-48	0.394775	0.637	0.623	1.83316e-43	4	Ier2
Ifitm10	1.006e-47	0.407467	0.306	0.255	2.8156e-43	4	Ifitm10
Zeb2	7.38948e-47	0.597826	0.225	0.109	2.06817e-42	4	Zeb2
Ccl5.1	7.50246e-47	0.467328	1	0.997	2.09979e-42	4	Ccl5
Cirbp.1	1.08235e-46	0.430662	0.512	0.436	3.02929e-42	4	Cirbp
Ifngr1.1	2.1587e-46	0.473242	0.694	0.607	6.04177e-42	4	Ifngr1
Gzmb	3.20941e-46	0.721591	0.418	0.246	8.98248e-42	4	Gzmb
Ets1	1.0393e-44	0.290093	0.52	0.545	2.90878e-40	4	Ets1
Itgb2	3.53467e-44	0.253607	0.428	0.468	9.89283e-40	4	Itgb2
Gm10269	1.43867e-43	-0.266618	0.301	0.57	4.02654e-39	4	Gm10269
Pik3r1.1	2.87573e-43	0.337749	0.408	0.398	8.0486e-39	4	Pik3r1
Srsf5	4.63154e-43	0.281269	0.729	0.793	1.29627e-38	4	Srsf5
Zbtb20	1.6345e-42	0.349634	0.316	0.317	4.57463e-38	4	Zbtb20
Cd28.1	1.85414e-42	-0.38769	0.209	0.484	5.18937e-38	4	Cd28
H2afz	2.26127e-42	0.352074	0.982	0.96	6.32884e-38	4	H2afz
Ms4a4c.3	2.84476e-42	-0.550851	0.043	0.267	7.9619e-38	4	Ms4a4c
Smarce1	3.21481e-42	0.26802	0.22	0.22	8.99761e-38	4	Smarce1
Ctsd	1.88668e-41	0.282268	0.72	0.763	5.28045e-37	4	Ctsd
Prex1	4.18536e-41	0.292002	0.317	0.324	1.1714e-36	4	Prex1
Cd3g.2	8.14763e-41	-0.737116	0.039	0.257	2.28036e-36	4	Cd3g
Klrc2.1	1.15795e-39	0.313007	0.475	0.47	3.24088e-35	4	Klrc2
Emp3	1.61845e-39	0.3873	0.643	0.599	4.52971e-35	4	Emp3
Dok2	1.70878e-38	0.257989	0.512	0.543	4.78254e-34	4	Dok2
Gm10073	8.52131e-38	-0.250425	0.952	0.992	2.38494e-33	4	Gm10073
H3f3b.1	2.78994e-37	0.29847	0.987	0.992	7.80849e-33	4	H3f3b
Cd7	3.40524e-37	-0.426551	0.59	0.835	9.53057e-33	4	Cd7
Sat1	1.09279e-36	0.26829	0.363	0.369	3.0585e-32	4	Sat1
Spn	1.40223e-36	0.265482	0.324	0.324	3.92455e-32	4	Spn
Fosb	2.91176e-36	-0.381353	0.028	0.203	8.14944e-32	4	Fosb
Mif.1	6.00887e-36	-0.255863	0.345	0.594	1.68176e-31	4	Mif
Ms4a6b	7.51541e-36	-0.308262	0.161	0.383	2.10341e-31	4	Ms4a6b
Vps37b.1	8.3666e-36	0.397576	0.587	0.538	2.34164e-31	4	Vps37b
Ptprc	2.64628e-35	0.279778	0.85	0.884	7.4064e-31	4	Ptprc
Gm2000.1	4.8556e-35	-0.314187	0.793	0.936	1.35899e-30	4	Gm2000
Ypel3.1	5.76617e-35	0.272916	0.572	0.594	1.61383e-30	4	Ypel3
Serpina3g.1	9.50556e-35	-0.46247	0.278	0.549	2.66042e-30	4	Serpina3g
Sytl3	1.36012e-34	0.287037	0.191	0.167	3.8067e-30	4	Sytl3
Rps17	8.79403e-34	-0.25046	0.98	0.989	2.46127e-29	4	Rps17
As3mt.1	1.32252e-33	0.390998	0.202	0.123	3.70148e-29	4	As3mt
Serpinb9.1	2.34163e-33	0.279175	0.316	0.301	6.55376e-29	4	Serpinb9
Gsap	5.93994e-33	0.258117	0.16	0.143	1.66247e-28	4	Gsap
Cd3d.2	3.88745e-32	-0.647692	0.044	0.232	1.08802e-27	4	Cd3d
Sepp1	5.03243e-32	0.279769	0.243	0.225	1.40848e-27	4	Sepp1
Cd160	9.66303e-32	-0.322382	0.143	0.353	2.70449e-27	4	Cd160
Nkg7	1.60925e-31	0.285183	0.995	0.993	4.50396e-27	4	Nkg7
Ptpre	1.65853e-31	0.26806	0.171	0.14	4.64191e-27	4	Ptpre
Plek.2	4.19718e-31	0.270529	0.319	0.308	1.17471e-26	4	Plek
Pim2.1	6.73356e-31	-0.330424	0.11	0.304	1.88459e-26	4	Pim2
Dcxr	1.53982e-30	0.29863	0.181	0.142	4.30965e-26	4	Dcxr
Klra9	7.0194e-30	0.55024	0.387	0.319	1.96459e-25	4	Klra9
Cd69	8.03614e-30	-0.367855	0.043	0.21	2.24916e-25	4	Cd69
Fasl	9.33403e-30	0.287236	0.207	0.175	2.61241e-25	4	Fasl
Car2.1	3.39352e-28	-0.395716	0.35	0.586	9.4978e-24	4	Car2
Hsp90ab1	1.16448e-26	-0.265046	0.706	0.888	3.25914e-22	4	Hsp90ab1
Tubb5.2	1.57346e-26	-0.495445	0.387	0.625	4.40381e-22	4	Tubb5
S1pr5	1.86943e-26	0.36787	0.11	0.026	5.23216e-22	4	S1pr5
Lgals1	1.79637e-25	0.350597	0.949	0.914	5.02767e-21	4	Lgals1
Fcer1g	4.09154e-25	0.252236	0.993	0.981	1.14514e-20	4	Fcer1g
Dut.1	1.31664e-24	-0.288533	0.076	0.232	3.68501e-20	4	Dut
Txk.1	1.39049e-24	0.251086	0.656	0.653	3.8917e-20	4	Txk
Ccl4.2	5.69347e-24	0.509072	0.62	0.476	1.59349e-19	4	Ccl4
Ifng.2	8.80233e-23	0.34101	0.326	0.312	2.4636e-18	4	Ifng
Ramp1	1.94679e-22	-0.263988	0.039	0.166	5.44867e-18	4	Ramp1
Klrg1	3.61108e-22	0.351021	0.105	0.05	1.01067e-17	4	Klrg1
Fgl2	9.84441e-22	0.275241	0.151	0.122	2.75525e-17	4	Fgl2
Bst2.1	6.15547e-21	-0.270365	0.082	0.226	1.72279e-16	4	Bst2
Mir142hg	2.93281e-20	0.257436	0.13	0.088	8.20834e-16	4	Mir142hg
Prdx2.2	9.38548e-20	-0.254866	0.227	0.369	2.62681e-15	4	Prdx2
Ccl3.3	3.05491e-19	0.45696	0.538	0.412	8.55008e-15	4	Ccl3
Gpx1.3	4.98047e-19	-0.525633	0.207	0.368	1.39393e-14	4	Gpx1
Klra4.2	7.0369e-17	0.414186	0.536	0.467	1.96949e-12	4	Klra4
Nrgn	3.97237e-16	-0.291035	0.112	0.251	1.11179e-11	4	Nrgn
Tbx21.1	6.56962e-16	0.268509	0.117	0.063	1.8387e-11	4	Tbx21
S100a4.1	9.43544e-15	-0.384746	0.058	0.173	2.64079e-10	4	S100a4
Hmgn2	1.71293e-14	-0.300691	0.166	0.312	4.79416e-10	4	Hmgn2
Klra8.1	8.89308e-14	0.361238	0.561	0.506	2.48899e-09	4	Klra8
Khdc1a	2.12144e-13	0.316052	0.15	0.092	5.93748e-09	4	Khdc1a
Cks1b.1	6.64276e-13	-0.302609	0.033	0.125	1.85918e-08	4	Cks1b
Tuba1b.3	2.14666e-10	-0.486971	0.26	0.4	6.00807e-06	4	Tuba1b
Ly6c2	8.05708e-07	0.452063	0.155	0.082	0.0225501	4	Ly6c2
H2afz.1	3.04928e-36	-0.505387	0.965	0.964	8.53433e-32	5	H2afz
Hmgb2.1	1.1799e-31	-0.519021	0.834	0.744	3.30231e-27	5	Hmgb2
Gzma.2	2.54332e-31	-0.722245	0.869	0.856	7.11823e-27	5	Gzma
Vps37b.2	2.80377e-31	-0.527329	0.458	0.559	7.8472e-27	5	Vps37b
Ranbp1.1	3.49019e-28	-0.284518	0.491	0.47	9.76835e-24	5	Ranbp1
Ube2s	2.46321e-27	-0.297164	0.517	0.472	6.89402e-23	5	Ube2s
Nfkbia.2	2.51557e-27	-0.486115	0.653	0.688	7.04057e-23	5	Nfkbia
Ms4a4c.4	1.5888e-25	0.32863	0.427	0.201	4.44673e-21	5	Ms4a4c
H3f3b.2	4.62326e-25	-0.304274	1	0.989	1.29396e-20	5	H3f3b
Cd7.1	1.70859e-23	0.266328	0.943	0.773	4.78199e-19	5	Cd7
Ier2.2	1.20108e-22	-0.357914	0.618	0.626	3.36157e-18	5	Ier2
Tubb5.3	3.86616e-22	-0.44091	0.634	0.579	1.08206e-17	5	Tubb5
Irf8.2	4.99007e-22	-0.432046	0.468	0.491	1.39662e-17	5	Irf8
Dek	9.5081e-22	-0.331834	0.376	0.403	2.66113e-17	5	Dek
Btg2.1	1.54016e-21	-0.288283	0.682	0.653	4.31059e-17	5	Btg2
Cirbp.2	3.39208e-21	-0.338962	0.421	0.452	9.49375e-17	5	Cirbp
Tnfaip3.1	5.18324e-21	-0.317741	0.32	0.336	1.45069e-16	5	Tnfaip3
Hmgn2.1	1.94066e-20	-0.30287	0.287	0.288	5.43151e-16	5	Hmgn2
Ifngr1.2	3.97449e-20	-0.32677	0.63	0.62	1.11238e-15	5	Ifngr1
Pim1.1	3.5573e-19	-0.300358	0.797	0.749	9.95617e-15	5	Pim1
Ppp1r15a.2	7.2785e-19	-0.266837	0.392	0.387	2.03711e-14	5	Ppp1r15a
H3f3a	3.54906e-18	-0.276127	0.947	0.934	9.9331e-14	5	H3f3a
Junb.1	7.65957e-18	-0.330514	0.967	0.953	2.14376e-13	5	Junb
Ccl3.4	1.36741e-16	-0.692775	0.374	0.442	3.8271e-12	5	Ccl3
Zfp36l2.1	1.64372e-16	-0.306341	0.52	0.53	4.60044e-12	5	Zfp36l2
Ptma	1.92522e-16	-0.315823	0.984	0.98	5.38831e-12	5	Ptma
Tuba1b.4	4.40315e-16	-0.594921	0.353	0.381	1.23235e-11	5	Tuba1b
Stmn1.4	6.64767e-16	-0.723848	0.113	0.19	1.86055e-11	5	Stmn1
Gpx1.4	1.0892e-14	-0.359759	0.454	0.325	3.04845e-10	5	Gpx1
Ly6c2.1	1.30187e-14	-0.82828	0.014	0.106	3.64367e-10	5	Ly6c2
Cma1.1	1.62301e-14	-0.415364	0.021	0.105	4.54247e-10	5	Cma1
Dusp1.1	6.18631e-14	-0.310761	0.372	0.419	1.73142e-09	5	Dusp1
Ccl4.3	9.64408e-14	-0.76177	0.441	0.508	2.69919e-09	5	Ccl4
H2afx.2	1.06637e-13	-0.392098	0.203	0.211	2.98456e-09	5	H2afx
Spry2.2	2.49952e-13	-0.411642	0.454	0.463	6.99567e-09	5	Spry2
Borcs7.2	1.13909e-12	-0.333548	0.131	0.192	3.18808e-08	5	Borcs7
Gzmb.1	3.55222e-11	-0.405481	0.244	0.278	9.94195e-07	5	Gzmb
Ifng.3	5.3772e-11	-0.382099	0.267	0.321	1.50497e-06	5	Ifng
Cks1b.2	7.73138e-11	-0.328197	0.043	0.12	2.16386e-06	5	Cks1b
Kdm6b.1	1.19801e-10	-0.331983	0.16	0.232	3.353e-06	5	Kdm6b
Cks2	2.01213e-08	-0.304832	0.101	0.174	0.000563155	5	Cks2
Actb.1	2.49353e-07	-0.288388	1	0.998	0.00697889	5	Actb
Zeb2.1	1.63869e-06	-0.252698	0.092	0.134	0.0458637	5	Zeb2
Ltb.3	9.26712e-65	0.581931	0.831	0.532	2.59368e-60	6	Ltb
Cd7.2	3.07658e-49	0.488389	0.915	0.77	8.61072e-45	6	Cd7
H2afz.2	1.29693e-44	-0.502594	0.946	0.968	3.62985e-40	6	H2afz
H2-K1.1	1.56495e-41	0.274661	1	0.98	4.37998e-37	6	H2-K1
Fos.2	4.00627e-40	0.541909	0.634	0.4	1.12128e-35	6	Fos
Gzma.3	1.49533e-39	-0.786084	0.763	0.877	4.18513e-35	6	Gzma
Xcl1.2	1.87913e-36	0.298373	0.94	0.765	5.25931e-32	6	Xcl1
Actg1.1	5.26795e-34	-0.3038	0.988	0.988	1.47439e-29	6	Actg1
Ccl3.5	3.91798e-30	-0.720058	0.238	0.474	1.09656e-25	6	Ccl3
Cd28.2	2.95041e-27	0.41616	0.597	0.405	8.25762e-23	6	Cd28
Stmn1.5	5.56545e-27	-0.865975	0.058	0.206	1.55766e-22	6	Stmn1
Thy1.3	2.27615e-23	0.370246	0.708	0.52	6.37049e-19	6	Thy1
Lgals1.1	1.32949e-22	-0.36859	0.868	0.931	3.72098e-18	6	Lgals1
Cd3g.3	2.99785e-22	0.540609	0.354	0.193	8.39038e-18	6	Cd3g
Gzmb.2	1.7272e-21	-0.591305	0.132	0.304	4.8341e-17	6	Gzmb
Ccl4.4	3.4824e-21	-0.685378	0.338	0.533	9.74653e-17	6	Ccl4
Ly6c2.2	8.55124e-20	-0.872131	0.014	0.111	2.39332e-15	6	Ly6c2
Emb.1	1.12993e-19	0.32072	0.623	0.47	3.16244e-15	6	Emb
Cma1.2	4.67392e-19	-0.419144	0.014	0.111	1.30814e-14	6	Cma1
Dynll1	5.42665e-19	0.302436	0.715	0.589	1.51881e-14	6	Dynll1
Ms4a4c.5	4.03447e-18	0.365965	0.34	0.207	1.12917e-13	6	Ms4a4c
Slc25a5	8.04008e-17	-0.267719	0.76	0.816	2.25026e-12	6	Slc25a5
Irf8.3	8.6193e-17	-0.454246	0.346	0.518	2.41237e-12	6	Irf8
Serpina3g.2	1.09499e-16	0.303749	0.64	0.476	3.06466e-12	6	Serpina3g
Mfsd6	6.26909e-16	0.30618	0.289	0.165	1.75459e-11	6	Mfsd6
Klf6.1	2.07928e-14	0.300373	0.537	0.402	5.8195e-10	6	Klf6
Ran	1.25884e-13	-0.252926	0.655	0.682	3.52323e-09	6	Ran
Jun	2.721e-13	0.325814	0.408	0.275	7.61554e-09	6	Jun
As3mt.2	4.30671e-13	-0.269789	0.052	0.154	1.20536e-08	6	As3mt
Pim2.2	8.51731e-13	0.301244	0.368	0.252	2.38382e-08	6	Pim2
Klra4.3	1.12705e-12	-0.483262	0.38	0.5	3.1544e-08	6	Klra4
Zeb2.2	3.03862e-12	-0.327345	0.051	0.145	8.50449e-08	6	Zeb2
Vim.1	6.90623e-12	-0.333151	0.6	0.693	1.93292e-07	6	Vim
Cd3d.3	9.94359e-12	0.311347	0.306	0.179	2.78301e-07	6	Cd3d
Serpinb6b.2	1.76947e-11	-0.339584	0.317	0.452	4.95239e-07	6	Serpinb6b
Borcs7.3	2.38004e-11	-0.329844	0.095	0.203	6.66125e-07	6	Borcs7
Cks1b.3	7.07358e-11	-0.308435	0.045	0.123	1.97975e-06	6	Cks1b
Cd69.1	1.61567e-10	0.254316	0.271	0.164	4.52195e-06	6	Cd69
Fosb.1	2.21251e-10	0.259255	0.251	0.158	6.19238e-06	6	Fosb
Ptma.1	3.82417e-10	-0.263532	0.977	0.981	1.07031e-05	6	Ptma
Plek.3	6.55366e-10	-0.265477	0.206	0.332	1.83424e-05	6	Plek
Hnrnpa1.1	7.65756e-10	-0.251554	0.528	0.631	2.1432e-05	6	Hnrnpa1
Socs2	8.37749e-10	0.256612	0.151	0.073	2.34469e-05	6	Socs2
Tubb5.4	1.16891e-08	-0.409873	0.578	0.588	0.000327156	6	Tubb5
Hmgn2.2	2.65234e-08	-0.329405	0.215	0.304	0.000742338	6	Hmgn2
Hmgb2.2	2.91106e-08	-0.45214	0.722	0.763	0.000814748	6	Hmgb2
Dek.1	8.53533e-08	-0.285541	0.309	0.418	0.00238887	6	Dek
Tuba1b.5	7.2507e-07	-0.490933	0.338	0.385	0.0202933	6	Tuba1b
Nme1.1	7.90164e-53	0.558905	0.891	0.619	2.21151e-48	7	Nme1
Eif5a	9.95937e-45	0.462062	0.955	0.842	2.78743e-40	7	Eif5a
Hsp90ab1.1	2.66643e-30	0.349427	0.967	0.844	7.4628e-26	7	Hsp90ab1
Tnfrsf9.1	4.40095e-29	0.530577	0.364	0.135	1.23174e-24	7	Tnfrsf9
Ypel3.2	4.12964e-28	-0.592881	0.374	0.618	1.1558e-23	7	Ypel3
Ranbp1.2	3.03434e-26	0.395967	0.714	0.442	8.49251e-22	7	Ranbp1
Psme2	4.61881e-26	0.38872	0.83	0.642	1.29271e-21	7	Psme2
Mif.2	1.07273e-24	0.418479	0.752	0.528	3.00234e-20	7	Mif
Nop10	7.76545e-24	0.379194	0.804	0.589	2.17339e-19	7	Nop10
Fbl	2.33332e-23	0.40137	0.603	0.358	6.53049e-19	7	Fbl
Hmgb2.3	5.69993e-23	-0.697075	0.69	0.764	1.5953e-18	7	Hmgb2
Xcl1.3	3.12486e-22	0.523528	0.927	0.778	8.74586e-18	7	Xcl1
Srm	4.08078e-22	0.3731	0.248	0.081	1.14213e-17	7	Srm
Ccnd2.1	1.11471e-19	0.362245	0.794	0.59	3.11985e-15	7	Ccnd2
Vim.2	2.1588e-19	-0.460534	0.608	0.686	6.04204e-15	7	Vim
Atp5g1	9.01406e-19	0.311953	0.806	0.612	2.52286e-14	7	Atp5g1
H2afz.3	8.66325e-18	-0.37243	0.974	0.963	2.42467e-13	7	H2afz
H2afv	2.79333e-17	-0.422792	0.48	0.563	7.81798e-13	7	H2afv
Ddx21	7.96892e-17	0.340864	0.506	0.295	2.23034e-12	7	Ddx21
Cycs.1	7.97093e-17	0.325874	0.716	0.51	2.2309e-12	7	Cycs
Nop16	1.07364e-16	0.251664	0.163	0.043	3.00491e-12	7	Nop16
Psme2b	3.34404e-16	0.323129	0.612	0.408	9.35929e-12	7	Psme2b
Hspe1	3.70986e-16	0.307151	0.783	0.598	1.03832e-11	7	Hspe1
C1qbp	4.39904e-16	0.342853	0.433	0.243	1.2312e-11	7	C1qbp
Nhp2	8.14494e-16	0.316238	0.541	0.334	2.27961e-11	7	Nhp2
Phb	9.15963e-16	0.26563	0.27	0.111	2.5636e-11	7	Phb
Usp50	2.15858e-15	0.335343	0.333	0.165	6.04144e-11	7	Usp50
Ppan	2.63706e-15	0.264947	0.208	0.073	7.38059e-11	7	Ppan
Mettl1	5.27392e-15	0.265516	0.161	0.048	1.47607e-10	7	Mettl1
Stmn1.6	5.60013e-15	-0.762039	0.099	0.191	1.56736e-10	7	Stmn1
Mrto4	7.11624e-15	0.267107	0.22	0.083	1.99169e-10	7	Mrto4
Ldha	1.21427e-14	0.289748	0.83	0.67	3.39851e-10	7	Ldha
Mrps28	8.72281e-14	0.284649	0.206	0.084	2.44134e-09	7	Mrps28
Gar1	5.12606e-13	0.283943	0.34	0.178	1.43468e-08	7	Gar1
Hspa9	5.34679e-13	0.305714	0.291	0.144	1.49646e-08	7	Hspa9
Gnl3	6.17553e-13	0.318526	0.267	0.125	1.72841e-08	7	Gnl3
Gzma.4	6.34165e-13	-0.452015	0.898	0.852	1.7749e-08	7	Gzma
Dek.2	7.98145e-13	-0.297244	0.371	0.403	2.23385e-08	7	Dek
Serpinb6b.3	4.29236e-12	-0.413025	0.317	0.443	1.20135e-07	7	Serpinb6b
Serpina3g.3	9.77193e-12	0.292723	0.662	0.484	2.73497e-07	7	Serpina3g
Ifngr1.3	2.01301e-11	-0.388871	0.53	0.633	5.63401e-07	7	Ifngr1
Hspd1	3.71706e-11	0.282359	0.381	0.223	1.04033e-06	7	Hspd1
Rrs1	5.20318e-11	0.256819	0.18	0.076	1.45627e-06	7	Rrs1
Cct3	6.38522e-11	0.256123	0.366	0.211	1.7871e-06	7	Cct3
Set	7.56009e-11	0.25798	0.645	0.472	2.11592e-06	7	Set
Vps37b.4	1.14066e-10	-0.378629	0.452	0.558	3.19248e-06	7	Vps37b
Ly6c2.3	1.41653e-10	-0.783548	0.019	0.104	3.96458e-06	7	Ly6c2
Phgdh	1.65774e-10	0.260377	0.296	0.161	4.63969e-06	7	Phgdh
Wdr43	2.13948e-10	0.255811	0.296	0.157	5.98799e-06	7	Wdr43
Supt4a	4.50647e-10	-0.281057	0.537	0.624	1.26127e-05	7	Supt4a
Serinc3	4.80235e-10	-0.289444	0.591	0.658	1.34408e-05	7	Serinc3
Snrpa1	6.05323e-10	0.261114	0.35	0.221	1.69418e-05	7	Snrpa1
Mrpl12	1.17596e-09	0.262539	0.421	0.282	3.29127e-05	7	Mrpl12
Ncl	2.52027e-09	0.258871	0.771	0.666	7.05375e-05	7	Ncl
Cma1.3	4.31874e-09	-0.359247	0.024	0.103	0.000120873	7	Cma1
Tubb5.5	6.2146e-09	-0.27974	0.652	0.577	0.000173934	7	Tubb5
Cd2	4.50289e-08	-0.252267	0.636	0.692	0.00126027	7	Cd2
Qrfp	8.25783e-08	-0.266944	0.087	0.191	0.0023112	7	Qrfp
Bnip3l	9.71657e-08	-0.338624	0.265	0.374	0.00271947	7	Bnip3l
Klra8.2	1.5373e-07	-0.269455	0.541	0.512	0.00430261	7	Klra8
Arl5c.1	4.67127e-07	-0.261126	0.08	0.169	0.0130739	7	Arl5c
Cirbp.3	7.2457e-07	-0.290522	0.359	0.46	0.0202793	7	Cirbp
Borcs7.4	1.12358e-06	-0.283647	0.102	0.195	0.0314468	7	Borcs7
Tmem176a	2.09197e-64	1.41339	0.483	0.006	5.85502e-60	8	Tmem176a
Tmem176b	1.70762e-62	1.55742	0.494	0.008	4.77929e-58	8	Tmem176b
S100a4.2	1.65799e-56	1.72533	0.713	0.14	4.64038e-52	8	S100a4
Klrb1b	5.92479e-42	1.35133	0.644	0.133	1.65823e-37	8	Klrb1b
Ckb	1.49455e-38	1.02355	0.322	0.003	4.18294e-34	8	Ckb
Rora	9.43269e-35	1.09801	0.425	0.039	2.64002e-30	8	Rora
Gzma.5	2.88188e-31	-1.78132	0.391	0.868	8.06582e-27	8	Gzma
Klra7	4.0384e-29	-1.5706	0.046	0.623	1.13027e-24	8	Klra7
Cxcr6	2.3271e-24	0.890288	0.218	0.004	6.51309e-20	8	Cxcr6
Ramp1.1	1.36853e-22	0.89496	0.391	0.139	3.83023e-18	8	Ramp1
Klra8.3	1.43909e-20	-1.85639	0.069	0.526	4.02773e-16	8	Klra8
Sell	1.98144e-19	-0.9493	0.184	0.67	5.54566e-15	8	Sell
Klra4.4	2.60139e-19	-1.81847	0.046	0.489	7.28077e-15	8	Klra4
Ikzf2	5.30079e-19	0.882819	0.425	0.102	1.48358e-14	8	Ikzf2
Ltb.4	2.37833e-18	0.811113	0.793	0.58	6.65648e-14	8	Ltb
Klre1	2.74366e-18	-0.754896	0.471	0.854	7.67897e-14	8	Klre1
Arg1	5.59541e-18	0.770774	0.126	0	1.56604e-13	8	Arg1
Ly6e.3	6.39596e-18	0.654984	0.966	0.786	1.7901e-13	8	Ly6e
Eomes	3.29225e-17	-0.766119	0.069	0.494	9.21434e-13	8	Eomes
Ly6c2.4	6.73968e-17	1.4851	0.402	0.087	1.8863e-12	8	Ly6c2
St6galnac3	1.13709e-16	0.727017	0.218	0.034	3.18248e-12	8	St6galnac3
Fth1.1	5.33786e-16	0.465816	0.943	0.961	1.49396e-11	8	Fth1
Nkg7.1	2.78825e-15	-0.410022	0.989	0.993	7.80375e-11	8	Nkg7
Ctla2a	3.49029e-15	-0.642168	0.402	0.806	9.76862e-11	8	Ctla2a
Gimap3	2.22311e-14	0.564934	0.609	0.492	6.22203e-10	8	Gimap3
Tyrobp	9.91675e-14	-0.388442	0.862	0.984	2.7755e-09	8	Tyrobp
Tnfrsf25	1.12967e-13	0.44138	0.126	0.003	3.16172e-09	8	Tnfrsf25
Rps17.1	2.16945e-13	-0.40585	0.931	0.989	6.07185e-09	8	Rps17
Cxcr3	7.81365e-13	0.566905	0.31	0.18	2.18688e-08	8	Cxcr3
Gpr183	5.55798e-12	0.5651	0.207	0.033	1.55557e-07	8	Gpr183
Gimap4	6.87162e-12	0.415958	0.816	0.793	1.92323e-07	8	Gimap4
Ifngr1.4	4.10275e-11	0.580257	0.736	0.619	1.14828e-06	8	Ifngr1
Lpar6	6.02894e-11	0.54414	0.207	0.043	1.68738e-06	8	Lpar6
Podnl1	7.35193e-11	0.436334	0.149	0.013	2.05766e-06	8	Podnl1
Ctla2b	2.00229e-10	-0.628918	0.092	0.414	5.60402e-06	8	Ctla2b
5430421N21Rik	2.18986e-10	0.473575	0.126	0.006	6.12898e-06	8	5430421N21Rik
Tnfrsf18	3.19411e-10	0.490524	0.563	0.409	8.93969e-06	8	Tnfrsf18
Rpl36-ps3	3.81144e-10	-0.423912	0.345	0.686	1.06674e-05	8	Rpl36-ps3
Cst7.1	4.478e-10	-0.608524	0.126	0.453	1.2533e-05	8	Cst7
Rps28	5.48536e-10	-0.259952	1	0.996	1.53524e-05	8	Rps28
Rcbtb2	5.7623e-10	0.502015	0.195	0.084	1.61275e-05	8	Rcbtb2
Rpl35.2	6.02259e-10	-0.335638	0.966	0.986	1.6856e-05	8	Rpl35
Sh2d1a	6.39623e-10	-0.516797	0.218	0.559	1.79018e-05	8	Sh2d1a
Lsp1	7.82044e-10	0.426082	0.69	0.639	2.18878e-05	8	Lsp1
Klrc1.1	8.7158e-10	0.580569	0.563	0.447	2.43938e-05	8	Klrc1
Ccnd3.1	1.56171e-09	0.357005	0.529	0.539	4.37093e-05	8	Ccnd3
Spint2	2.1929e-09	0.377208	0.218	0.171	6.13748e-05	8	Spint2
Klra9.1	3.05514e-09	-0.852379	0.057	0.337	8.55072e-05	8	Klra9
Aes	4.36896e-09	0.400668	0.322	0.257	0.000122278	8	Aes
Lysmd2	5.31974e-09	0.398932	0.138	0.018	0.000148889	8	Lysmd2
Mta2	5.9731e-09	0.257052	0.218	0.226	0.000167175	8	Mta2
Acyp2	1.13347e-08	0.356665	0.115	0.014	0.000317237	8	Acyp2
Il18rap	1.13526e-08	0.49736	0.391	0.261	0.000317736	8	Il18rap
Cirbp.4	1.87385e-08	0.532041	0.621	0.444	0.000524454	8	Cirbp
B2m	2.34331e-08	0.276164	1	0.997	0.000655846	8	B2m
AU020206	2.35948e-08	0.456468	0.149	0.068	0.00066037	8	AU020206
Itgb7	2.54796e-08	0.523405	0.54	0.354	0.000713124	8	Itgb7
Trf	2.77625e-08	0.489598	0.218	0.048	0.000777017	8	Trf
Klri2	2.79461e-08	-0.502456	0.195	0.502	0.000782156	8	Klri2
Psmd4	3.01018e-08	0.256686	0.368	0.379	0.000842489	8	Psmd4
Abhd8	4.77481e-08	0.467693	0.253	0.127	0.00133637	8	Abhd8
Cd53	5.11816e-08	0.321614	0.632	0.658	0.00143247	8	Cd53
Lgals1.2	5.67114e-08	-0.509385	0.759	0.924	0.00158724	8	Lgals1
Klrd1	7.22875e-08	-0.299103	0.69	0.91	0.00202318	8	Klrd1
Gabarapl2	1.43016e-07	0.400722	0.632	0.539	0.00400272	8	Gabarapl2
Lmo4	1.50169e-07	0.452657	0.207	0.132	0.00420292	8	Lmo4
Prdx6	1.68613e-07	0.38729	0.506	0.432	0.00471913	8	Prdx6
Rgs1.1	1.73872e-07	0.637004	0.471	0.298	0.00486632	8	Rgs1
Itm2c	1.85833e-07	0.423218	0.333	0.218	0.00520111	8	Itm2c
Il2rg	1.87184e-07	0.288158	0.506	0.553	0.0052389	8	Il2rg
Nebl	2.00794e-07	0.410717	0.103	0.02	0.00561982	8	Nebl
Tapbpl	2.16022e-07	0.306714	0.322	0.288	0.00604601	8	Tapbpl
Srgn	2.2961e-07	0.356849	0.862	0.762	0.00642632	8	Srgn
Ccl5.2	2.43191e-07	-0.365832	0.977	0.998	0.00680642	8	Ccl5
Paip2	3.05904e-07	0.28636	0.471	0.46	0.00856164	8	Paip2
Acbd6	3.38247e-07	0.269121	0.241	0.215	0.00946687	8	Acbd6
U2surp	3.72418e-07	0.436961	0.345	0.199	0.0104232	8	U2surp
Ikzf3	4.17799e-07	0.347832	0.264	0.194	0.0116933	8	Ikzf3
Sec11c	4.82745e-07	0.254574	0.483	0.515	0.0135111	8	Sec11c
Il7r	5.64291e-07	0.529897	0.195	0.043	0.0157934	8	Il7r
Gimap1	5.68385e-07	0.320202	0.609	0.636	0.015908	8	Gimap1
Cd82.1	5.7023e-07	0.42335	0.402	0.375	0.0159596	8	Cd82
Cd2.1	6.12063e-07	-0.287256	0.425	0.692	0.0171304	8	Cd2
Irf8.4	6.1502e-07	-0.6786	0.218	0.495	0.0172132	8	Irf8
Lbh	6.30809e-07	0.40094	0.356	0.225	0.0176551	8	Lbh
Serpina3g.4	6.32519e-07	0.398011	0.506	0.504	0.0177029	8	Serpina3g
Pdia3	6.44903e-07	0.286577	0.46	0.453	0.0180495	8	Pdia3
Ahcyl2	6.71166e-07	0.422323	0.161	0.073	0.0187846	8	Ahcyl2
Dnlz	6.93531e-07	0.299707	0.184	0.139	0.0194105	8	Dnlz
Dusp1.2	7.25781e-07	0.289157	0.368	0.414	0.0203132	8	Dusp1
Acat1	7.40076e-07	0.34841	0.23	0.148	0.0207132	8	Acat1
Lrrk1	7.68087e-07	-0.296425	0.103	0.31	0.0214972	8	Lrrk1
Pkm	7.92377e-07	0.368841	0.552	0.485	0.022177	8	Pkm
Cdc42se2	8.41387e-07	0.411542	0.333	0.214	0.0235487	8	Cdc42se2
H2afz.4	8.76294e-07	-0.414778	0.851	0.967	0.0245257	8	H2afz
AI662270	9.38759e-07	0.295866	0.333	0.314	0.026274	8	AI662270
Spcs2	9.46604e-07	0.3432	0.494	0.422	0.0264936	8	Spcs2
Pbxip1	9.53307e-07	0.388806	0.379	0.268	0.0266811	8	Pbxip1
Nabp1.1	1.06633e-06	0.332538	0.287	0.271	0.0298444	8	Nabp1
Zyx	1.23195e-06	0.259756	0.506	0.512	0.0344798	8	Zyx
Rgs2.1	1.43798e-06	0.322021	0.471	0.474	0.0402461	8	Rgs2
Rnf7	1.50412e-06	0.28002	0.414	0.398	0.0420972	8	Rnf7
Esyt1	1.53587e-06	0.259878	0.299	0.282	0.0429859	8	Esyt1
Vsir	1.69281e-06	0.322312	0.241	0.19	0.0473783	8	Vsir
Tyrobp.1	2.9227e-152	-1.38399	0.627	0.993	8.18006e-148	9	Tyrobp
Cd3e	4.57588e-112	1.39568	0.587	0.002	1.2807e-107	9	Cd3e
Cd3d.5	2.68539e-98	1.67509	0.897	0.177	7.51587e-94	9	Cd3d
AW112010	4.14477e-96	-1.06674	0.937	0.996	1.16004e-91	9	AW112010
Ly6c2.5	1.47551e-78	2.01873	0.754	0.071	4.12965e-74	9	Ly6c2
Cd3g.4	4.27375e-70	1.36943	0.905	0.197	1.19614e-65	9	Cd3g
Gzma.6	3.65028e-68	-2.42673	0.27	0.878	1.02164e-63	9	Gzma
Fcer1g.1	2.83696e-59	-0.792252	0.754	0.991	7.94008e-55	9	Fcer1g
Nkg7.2	3.50813e-42	-0.641947	0.976	0.994	9.81856e-38	9	Nkg7
Klrk1.1	3.9752e-41	-0.958029	0.421	0.898	1.11258e-36	9	Klrk1
Ncr1.1	1.11761e-38	-1.20664	0.167	0.724	3.12798e-34	9	Ncr1
Lgals1.3	1.21098e-33	-1.06776	0.635	0.93	3.3893e-29	9	Lgals1
Ccr2	4.75411e-33	-1.10772	0.183	0.699	1.33058e-28	9	Ccr2
Ikzf2.1	2.25216e-32	1.0059	0.46	0.097	6.30335e-28	9	Ikzf2
Klra8.4	5.6618e-31	-1.84174	0.056	0.532	1.58462e-26	9	Klra8
Klra4.5	1.63509e-30	-2.08509	0.048	0.494	4.5763e-26	9	Klra4
Rps19	3.11733e-30	0.398662	1	0.998	8.72478e-26	9	Rps19
Id2.2	5.75798e-30	-0.895442	0.516	0.89	1.61154e-25	9	Id2
Klri2.1	1.47766e-28	-1.14925	0.048	0.511	4.13567e-24	9	Klri2
Klre1.1	5.27054e-28	-0.839192	0.468	0.858	1.47512e-23	9	Klre1
Klk8	3.34509e-26	0.751375	0.302	0.038	9.36223e-22	9	Klk8
Il7r.1	1.71513e-24	0.844044	0.317	0.037	4.80031e-20	9	Il7r
Rplp2	1.83462e-23	0.268701	1	0.999	5.13474e-19	9	Rplp2
Irf8.5	2.21073e-23	-1.07564	0.079	0.503	6.1874e-19	9	Irf8
Car2.2	7.00993e-23	-1.00048	0.127	0.562	1.96194e-18	9	Car2
Sh3bgrl3	1.21849e-21	-0.396617	0.976	0.985	3.41031e-17	9	Sh3bgrl3
Rps5	7.11436e-21	0.284418	1	0.999	1.99117e-16	9	Rps5
H2-D1	7.28023e-21	-0.403513	0.976	0.994	2.03759e-16	9	H2-D1
Cd47.1	4.18723e-20	-0.621368	0.571	0.877	1.17192e-15	9	Cd47
Eomes.1	1.48401e-19	-0.834679	0.111	0.497	4.15345e-15	9	Eomes
Klra6	7.97006e-19	0.751014	0.341	0.067	2.23066e-14	9	Klra6
Dapl1	2.08064e-18	0.565416	0.103	0.001	5.8233e-14	9	Dapl1
mt-Nd1	3.3299e-18	0.378095	0.992	0.985	9.31973e-14	9	mt-Nd1
Rps7	3.81967e-18	0.261515	1	0.998	1.06905e-13	9	Rps7
Rpl17	9.76461e-18	0.265962	1	0.998	2.73292e-13	9	Rpl17
Rps28.1	1.05618e-17	0.302108	1	0.996	2.95604e-13	9	Rps28
Rplp0.1	1.09229e-17	0.290218	1	0.998	3.05711e-13	9	Rplp0
Rpl12	6.43483e-17	0.347136	0.992	0.988	1.80098e-12	9	Rpl12
Gramd3.2	1.06504e-16	0.546478	0.317	0.06	2.98082e-12	9	Gramd3
Nsg2	3.00964e-16	0.480541	0.214	0.032	8.42338e-12	9	Nsg2
S100a10	4.56774e-16	-0.47709	0.865	0.949	1.27842e-11	9	S100a10
Rpl35a	4.62913e-16	0.257842	1	0.999	1.2956e-11	9	Rpl35a
Ifi27l2a	5.96197e-16	0.809077	0.246	0.035	1.66864e-11	9	Ifi27l2a
Rps21	1.0736e-15	0.295377	1	0.994	3.00481e-11	9	Rps21
Cyba	1.31284e-15	-0.528127	0.77	0.914	3.67438e-11	9	Cyba
Ccl4.6	3.97519e-15	-1.56425	0.19	0.51	1.11258e-10	9	Ccl4
Ccl3.7	4.96174e-15	-1.17394	0.111	0.444	1.38869e-10	9	Ccl3
Tmem108	7.31053e-15	0.388503	0.143	0.009	2.04607e-10	9	Tmem108
Gm8369	1.25609e-14	0.318924	0.135	0.007	3.51555e-10	9	Gm8369
Itm2b	1.64351e-14	-0.450211	0.81	0.915	4.59987e-10	9	Itm2b
Gpx4	1.66088e-14	-0.525609	0.675	0.867	4.64848e-10	9	Gpx4
Klrb1a	3.3236e-14	-0.710724	0.119	0.445	9.30209e-10	9	Klrb1a
Rps15	4.39863e-14	0.250344	1	0.998	1.23109e-09	9	Rps15
Ltb.5	5.53761e-14	0.52563	0.873	0.574	1.54987e-09	9	Ltb
Rps20.2	5.58916e-14	0.300165	1	0.993	1.56429e-09	9	Rps20
Sub1	1.20539e-13	-0.404426	0.889	0.955	3.37365e-09	9	Sub1
Anxa2.1	2.10835e-13	-0.553346	0.563	0.819	5.90086e-09	9	Anxa2
Serpina3g.5	2.85153e-13	-0.815308	0.206	0.515	7.98087e-09	9	Serpina3g
Actg1.2	6.93541e-13	-0.37516	0.968	0.988	1.94108e-08	9	Actg1
Klrb1c	7.69231e-13	-0.583775	0.516	0.794	2.15292e-08	9	Klrb1c
Gm28875.1	1.53786e-12	-0.615897	0.04	0.298	4.30416e-08	9	Gm28875
Actn1	1.6895e-12	0.292996	0.111	0.006	4.72857e-08	9	Actn1
Gpr183.1	1.70294e-12	0.43496	0.206	0.032	4.76618e-08	9	Gpr183
Klrc2.2	2.21737e-12	-0.588393	0.167	0.481	6.20598e-08	9	Klrc2
H2-K1.2	2.46835e-12	-0.370772	0.968	0.984	6.90841e-08	9	H2-K1
Cmtm7	2.93659e-12	-0.605705	0.206	0.525	8.21893e-08	9	Cmtm7
Lat	8.822e-12	0.557432	0.452	0.228	2.4691e-07	9	Lat
Rpl36a	1.07315e-11	0.293748	0.992	0.989	3.00353e-07	9	Rpl36a
Klrb1f.1	1.52417e-11	-0.527705	0.095	0.373	4.26585e-07	9	Klrb1f
Pycard.1	3.77253e-11	-0.570622	0.405	0.687	1.05586e-06	9	Pycard
Gzmb.4	1.35376e-10	-0.742359	0.048	0.282	3.78891e-06	9	Gzmb
Chsy1	1.5316e-10	-0.545736	0.095	0.358	4.28665e-06	9	Chsy1
Bcl11b	1.8056e-10	0.284078	0.127	0.012	5.0535e-06	9	Bcl11b
Rgs10	2.20372e-10	0.450187	0.198	0.047	6.16778e-06	9	Rgs10
Lat2	2.58261e-10	-0.55424	0.143	0.416	7.2282e-06	9	Lat2
Ctsd.1	3.03972e-10	-0.501418	0.516	0.764	8.50758e-06	9	Ctsd
mt-Nd4	4.53344e-10	0.316243	0.984	0.963	1.26882e-05	9	mt-Nd4
Phactr3.1	4.91438e-10	-0.442062	0	0.149	1.37544e-05	9	Phactr3
Klra9.2	7.08254e-10	-0.822638	0.095	0.338	1.98226e-05	9	Klra9
Mef2c	1.07216e-09	-0.370776	0	0.144	3.00077e-05	9	Mef2c
Tmem160	3.49853e-09	-0.406966	0.222	0.494	9.79168e-05	9	Tmem160
S1pr1	3.96963e-09	0.509468	0.238	0.066	0.000111102	9	S1pr1
Gm12840	4.98246e-09	0.530927	0.127	0.021	0.000139449	9	Gm12840
Zfp512	7.37086e-09	-0.495758	0.119	0.363	0.000206296	9	Zfp512
Itgb1	7.51997e-09	-0.508337	0.175	0.434	0.000210469	9	Itgb1
Hnrnpu	9.93814e-09	-0.298475	0.159	0.388	0.000278149	9	Hnrnpu
S100a13	1.01186e-08	-0.42541	0.397	0.666	0.000283199	9	S100a13
St3gal6	1.03871e-08	-0.470921	0.151	0.402	0.000290714	9	St3gal6
Reep5	1.84183e-08	-0.422928	0.468	0.721	0.000515491	9	Reep5
Arpc1b	2.30115e-08	-0.314766	0.881	0.948	0.000644047	9	Arpc1b
Ms4a6b.1	2.44392e-08	0.443421	0.46	0.343	0.000684004	9	Ms4a6b
Plek.5	3.30675e-08	-0.482032	0.095	0.318	0.000925494	9	Plek
Dbi	3.44936e-08	-0.50656	0.183	0.424	0.000965407	9	Dbi
Plscr1.1	3.56438e-08	-0.433839	0.04	0.226	0.0009976	9	Plscr1
Rpl31	4.17623e-08	0.250292	0.992	0.987	0.00116884	9	Rpl31
Klra3.1	4.94838e-08	-0.599625	0.04	0.225	0.00138495	9	Klra3
Napsa	5.35142e-08	-0.342354	0.008	0.155	0.00149776	9	Napsa
S100a11	5.79375e-08	-0.413212	0.698	0.812	0.00162155	9	S100a11
Cd244	7.00405e-08	-0.443815	0.087	0.3	0.00196029	9	Cd244
Nrgn.1	7.71299e-08	-0.512075	0.048	0.234	0.00215871	9	Nrgn
Gm26740.1	7.94573e-08	0.45917	0.341	0.164	0.00222385	9	Gm26740
Sh2d2a.1	9.22609e-08	-0.479868	0.214	0.46	0.0025822	9	Sh2d2a
Oaz1	9.53235e-08	-0.284033	0.937	0.983	0.00266791	9	Oaz1
Rps26	9.80548e-08	0.253813	1	0.972	0.00274436	9	Rps26
Gm15518.1	1.02617e-07	-0.363351	0.024	0.184	0.00287204	9	Gm15518
Cd72	1.27258e-07	-0.399292	0.087	0.292	0.00356169	9	Cd72
Itgax	1.29208e-07	-0.348821	0.024	0.177	0.00361628	9	Itgax
Serpinb6b.4	1.42184e-07	-0.520936	0.198	0.437	0.00397945	9	Serpinb6b
Ctla2b.1	1.7221e-07	-0.371869	0.183	0.414	0.00481981	9	Ctla2b
Ccr5	2.17995e-07	-0.412855	0.063	0.254	0.00610126	9	Ccr5
Id3	2.20537e-07	0.313846	0.103	0.015	0.00617239	9	Id3
Acp5	2.24551e-07	0.401328	0.317	0.178	0.00628475	9	Acp5
Fxyd5	2.48346e-07	-0.331792	0.841	0.933	0.00695071	9	Fxyd5
Chmp4b	2.65127e-07	-0.41653	0.238	0.48	0.00742037	9	Chmp4b
Dok2.1	3.61021e-07	-0.393769	0.302	0.546	0.0101042	9	Dok2
Gm2000.3	3.87342e-07	0.277059	0.96	0.911	0.0108409	9	Gm2000
Myl12a	3.88961e-07	-0.366444	0.698	0.841	0.0108862	9	Myl12a
Myl6	3.98374e-07	-0.272888	0.897	0.965	0.0111497	9	Myl6
Fcgr3	4.47764e-07	-0.365663	0.063	0.244	0.012532	9	Fcgr3
Ugcg	5.0909e-07	-0.335034	0.254	0.486	0.0142484	9	Ugcg
Rnf138	5.12288e-07	0.422243	0.452	0.274	0.0143379	9	Rnf138
Cdc42	5.45111e-07	-0.369708	0.595	0.795	0.0152566	9	Cdc42
Lmo4.1	5.71265e-07	-0.345109	0.008	0.138	0.0159886	9	Lmo4
Hcst	5.76242e-07	0.302688	0.968	0.924	0.0161278	9	Hcst
Lef1	6.04635e-07	0.391908	0.317	0.164	0.0169225	9	Lef1
Bcl2	6.69838e-07	0.364293	0.786	0.666	0.0187474	9	Bcl2
Arpc2	7.21239e-07	-0.288927	0.833	0.937	0.020186	9	Arpc2
Prdx5	8.27891e-07	-0.393778	0.302	0.538	0.023171	9	Prdx5
Ift20	9.39643e-07	-0.410639	0.143	0.354	0.0262987	9	Ift20
Serpinb9.3	9.83036e-07	-0.465038	0.111	0.31	0.0275132	9	Serpinb9
Klrd1.1	1.41666e-06	-0.287308	0.77	0.91	0.0396495	9	Klrd1
Tmem37	1.54508e-06	-0.385943	0.048	0.212	0.0432436	9	Tmem37
Isg15	5.16099e-112	1.98483	0.805	0.06	1.44446e-107	10	Isg15
Ifit3	2.77003e-69	1.20544	0.478	0.007	7.75277e-65	10	Ifit3
Ifit1	1.50699e-62	1.14597	0.425	0.006	4.21776e-58	10	Ifit1
Bst2.2	5.41227e-56	1.25317	0.708	0.186	1.51479e-51	10	Bst2
Rtp4	3.48759e-49	1.04521	0.646	0.088	9.76107e-45	10	Rtp4
Zbp1.1	2.21352e-46	1.07151	0.761	0.245	6.19519e-42	10	Zbp1
Usp18	3.47852e-46	0.993575	0.451	0.031	9.73569e-42	10	Usp18
Cxcl10	8.89594e-44	1.53242	0.398	0.028	2.4898e-39	10	Cxcl10
Trim30a	5.27606e-42	1.06479	0.699	0.191	1.47666e-37	10	Trim30a
Ifi203	2.19855e-39	0.955745	0.805	0.374	6.15331e-35	10	Ifi203
Phf11b.1	2.52701e-38	1.01035	0.611	0.171	7.07259e-34	10	Phf11b
Rsad2	3.17997e-38	0.747401	0.301	0.006	8.9001e-34	10	Rsad2
Irf7	9.85593e-38	0.979737	0.664	0.139	2.75848e-33	10	Irf7
Gm4955	2.36357e-31	0.919199	0.637	0.17	6.61517e-27	10	Gm4955
Pyhin1	3.88073e-30	0.903333	0.549	0.139	1.08614e-25	10	Pyhin1
Ifi204	8.5726e-28	0.634101	0.239	0.008	2.3993e-23	10	Ifi204
Stat1	1.07419e-27	0.815284	0.611	0.166	3.00645e-23	10	Stat1
Pydc3	2.07387e-27	0.874872	0.469	0.119	5.80436e-23	10	Pydc3
Serpina3g.6	4.12728e-27	0.868189	0.805	0.495	1.15514e-22	10	Serpina3g
Irgm1	4.49422e-27	0.692167	0.425	0.059	1.25784e-22	10	Irgm1
Oasl1	2.29941e-26	0.491781	0.248	0.01	6.43559e-22	10	Oasl1
Ifit2	3.41706e-26	0.656213	0.292	0.021	9.56368e-22	10	Ifit2
Rnf213	1.4884e-25	0.698372	0.389	0.055	4.16573e-21	10	Rnf213
Xaf1	3.49834e-25	0.780304	0.504	0.111	9.79115e-21	10	Xaf1
Oas3	4.17216e-25	0.510807	0.257	0.014	1.1677e-20	10	Oas3
Cmpk2	2.57373e-24	0.601593	0.248	0.015	7.20335e-20	10	Cmpk2
Mndal	4.6689e-24	0.804745	0.743	0.365	1.30673e-19	10	Mndal
Igtp	2.56543e-23	0.657036	0.381	0.054	7.18013e-19	10	Igtp
Pydc4	3.18653e-23	0.762589	0.425	0.077	8.91846e-19	10	Pydc4
Ifi47	4.49727e-23	0.758776	0.575	0.198	1.2587e-18	10	Ifi47
Parp9	1.76336e-22	0.60713	0.327	0.041	4.93529e-18	10	Parp9
Eif2ak2	1.09509e-21	0.638023	0.319	0.041	3.06495e-17	10	Eif2ak2
Xcl1.6	1.46945e-21	0.848227	0.947	0.79	4.11268e-17	10	Xcl1
Psmb8	3.47844e-21	0.520262	0.973	0.845	9.73547e-17	10	Psmb8
Ifi44	3.83712e-21	0.540363	0.168	0.006	1.07393e-16	10	Ifi44
Trafd1	7.97186e-21	0.712873	0.416	0.102	2.23116e-16	10	Trafd1
Samhd1	1.47996e-19	0.751282	0.593	0.275	4.14211e-15	10	Samhd1
Ifi35	2.06356e-19	0.693669	0.575	0.198	5.7755e-15	10	Ifi35
Phf11a	2.98208e-19	0.536205	0.274	0.029	8.34623e-15	10	Phf11a
BC094916	4.87568e-19	0.555798	0.257	0.026	1.36461e-14	10	BC094916
Herc6	1.06512e-18	0.617966	0.327	0.055	2.98105e-14	10	Herc6
Pml	6.24708e-18	0.540523	0.319	0.049	1.74843e-13	10	Pml
Mx1	6.89755e-18	0.408622	0.168	0.007	1.93049e-13	10	Mx1
Ly6e.4	9.33224e-18	0.497356	0.973	0.785	2.61191e-13	10	Ly6e
Slfn8	1.1215e-17	0.638747	0.372	0.075	3.13886e-13	10	Slfn8
Casp4	4.06119e-17	0.511854	0.336	0.059	1.13665e-12	10	Casp4
Ppa1.1	5.41481e-17	0.659515	0.389	0.112	1.5155e-12	10	Ppa1
Ccnd2.2	5.94553e-17	0.619868	0.85	0.606	1.66403e-12	10	Ccnd2
Trim30d	1.24015e-16	0.460998	0.257	0.031	3.47092e-12	10	Trim30d
Lgals3bp	2.43075e-16	0.58398	0.558	0.199	6.80317e-12	10	Lgals3bp
Amica1.1	5.37065e-16	0.557825	0.212	0.035	1.50314e-11	10	Amica1
Shisa5	1.01256e-15	0.403615	0.991	0.957	2.83394e-11	10	Shisa5
Psmb10	2.71954e-15	0.526289	0.85	0.552	7.61144e-11	10	Psmb10
Parp14	5.90443e-15	0.589334	0.345	0.079	1.65253e-10	10	Parp14
H2-T22	1.29387e-14	0.553826	0.796	0.54	3.62128e-10	10	H2-T22
Phf11c	3.56504e-14	0.415614	0.221	0.028	9.97784e-10	10	Phf11c
Tgtp1	4.31958e-14	0.324483	0.124	0.004	1.20896e-09	10	Tgtp1
Tmsb10.1	1.28491e-13	0.250538	1	0.997	3.5962e-09	10	Tmsb10
Psme2.1	2.34831e-13	0.478962	0.903	0.656	6.57245e-09	10	Psme2
Tor3a	6.36508e-13	0.501688	0.265	0.051	1.78146e-08	10	Tor3a
Mnda	8.01673e-13	0.348696	0.133	0.008	2.24372e-08	10	Mnda
Ddx58	1.36975e-12	0.469638	0.354	0.093	3.83366e-08	10	Ddx58
Adar	2.28045e-12	0.395067	0.257	0.047	6.38252e-08	10	Adar
Oas1a	2.86791e-12	0.369533	0.212	0.03	8.0267e-08	10	Oas1a
Ms4a4b	3.2348e-12	0.408902	0.965	0.882	9.05354e-08	10	Ms4a4b
Ctss	5.71877e-12	0.547243	0.46	0.186	1.60057e-07	10	Ctss
Tapbp.1	7.35211e-12	0.50216	0.673	0.366	2.05771e-07	10	Tapbp
Gbp9	1.00051e-11	0.46757	0.239	0.046	2.80022e-07	10	Gbp9
Gbp4	1.36089e-11	0.526994	0.363	0.114	3.80885e-07	10	Gbp4
Ms4a4c.7	1.52544e-11	0.627989	0.513	0.221	4.26941e-07	10	Ms4a4c
Chmp4b.1	1.97771e-11	0.475216	0.752	0.463	5.53521e-07	10	Chmp4b
Ifit1bl1	2.42153e-11	0.310739	0.159	0.016	6.77738e-07	10	Ifit1bl1
Serpina3f.1	3.92613e-11	0.436866	0.23	0.043	1.09884e-06	10	Serpina3f
Daxx	3.97751e-11	0.491762	0.319	0.089	1.11323e-06	10	Daxx
Isg20	5.63553e-11	0.314542	0.142	0.013	1.57727e-06	10	Isg20
Gbp7	1.90927e-10	0.540493	0.425	0.178	5.34367e-06	10	Gbp7
Ddx24	2.17707e-10	0.502589	0.628	0.341	6.09318e-06	10	Ddx24
H2-T23	2.20904e-10	0.493358	0.726	0.444	6.18266e-06	10	H2-T23
Pim2.4	2.37231e-10	0.527207	0.558	0.263	6.63962e-06	10	Pim2
Psme1	3.07428e-10	0.417891	0.867	0.747	8.60429e-06	10	Psme1
Trim25	4.9884e-10	0.40832	0.195	0.033	1.39615e-05	10	Trim25
Phf11d	6.07007e-10	0.268383	0.15	0.017	1.69889e-05	10	Phf11d
Tap1	1.22499e-09	0.420438	0.478	0.203	3.42851e-05	10	Tap1
Slfn5	1.25225e-09	0.330113	0.106	0.007	3.50479e-05	10	Slfn5
Slfn2	1.51545e-09	0.523864	0.628	0.358	4.24144e-05	10	Slfn2
Ms4a6b.2	2.45646e-09	0.497528	0.549	0.341	6.87513e-05	10	Ms4a6b
Lilrb4a	2.67903e-09	0.369375	0.239	0.056	7.49808e-05	10	Lilrb4a
Tnfrsf9.3	5.77258e-09	0.413995	0.398	0.153	0.000161563	10	Tnfrsf9
H2-K1.3	6.274e-09	0.279592	1	0.983	0.000175597	10	H2-K1
Mitd1	8.94557e-09	0.479672	0.336	0.128	0.000250369	10	Mitd1
Clic4	1.02221e-08	0.329185	0.204	0.043	0.000286095	10	Clic4
Sepw1	1.57357e-08	0.373397	0.92	0.737	0.000440411	10	Sepw1
H2-Q7.2	1.95074e-08	0.345098	0.947	0.815	0.000545974	10	H2-Q7
H2afz.6	2.07721e-08	-0.448946	0.912	0.966	0.000581369	10	H2afz
Nampt	2.25414e-08	0.301257	0.212	0.049	0.00063089	10	Nampt
Gm28347	2.41335e-08	0.342093	0.248	0.068	0.000675448	10	Gm28347
Gadd45g	4.71151e-08	0.535284	0.159	0.04	0.00131866	10	Gadd45g
Smchd1	1.00643e-07	0.432786	0.513	0.265	0.00281679	10	Smchd1
Sp100	1.13533e-07	0.412546	0.735	0.512	0.00317755	10	Sp100
Ehd4	1.46721e-07	0.382445	0.319	0.116	0.00410643	10	Ehd4
Il15	1.64975e-07	0.26831	0.142	0.023	0.00461733	10	Il15
Hmgb2.5	1.66923e-07	-0.703493	0.619	0.76	0.00467183	10	Hmgb2
Gm9844	2.16109e-07	0.357206	0.841	0.669	0.00604847	10	Gm9844
Gzmb.5	2.21949e-07	0.691433	0.487	0.267	0.00621192	10	Gzmb
Lgals9.1	2.45176e-07	0.394855	0.354	0.146	0.00686199	10	Lgals9
Ogfr	3.45262e-07	0.390988	0.46	0.23	0.00966318	10	Ogfr
Treml2	9.19002e-07	0.296106	0.142	0.03	0.025721	10	Treml2
Il10ra	9.63225e-07	0.357369	0.265	0.091	0.0269587	10	Il10ra
Samd9l	9.75805e-07	0.344016	0.265	0.091	0.0273108	10	Samd9l
Cst7.2	1.01891e-06	0.36059	0.681	0.438	0.0285172	10	Cst7
Epsti1	1.02033e-06	0.266983	0.92	0.751	0.028557	10	Epsti1
Dtx3l	1.03066e-06	0.371486	0.283	0.104	0.028846	10	Dtx3l
Cd69.4	1.03389e-06	0.503565	0.381	0.176	0.0289365	10	Cd69
Klrd1.2	1.03765e-06	-0.290947	0.929	0.904	0.0290416	10	Klrd1
9930111J21Rik2	1.14923e-06	0.422364	0.248	0.086	0.0321646	10	9930111J21Rik2
Tnfsf8	1.19463e-06	0.30596	0.186	0.047	0.0334352	10	Tnfsf8
Xdh	1.46205e-06	0.318358	0.257	0.087	0.0409198	10	Xdh
Lilr4b	1.50521e-06	0.284667	0.186	0.048	0.0421278	10	Lilr4b
Naa20	1.52559e-06	0.357231	0.292	0.114	0.0426982	10	Naa20
Stmn1.9	1.20112e-102	1.67584	0.95	0.15	3.36171e-98	11	Stmn1
Dut.2	1.36102e-86	1.19436	0.915	0.178	3.80922e-82	11	Dut
Malat1.2	3.87606e-83	-0.915794	0.986	0.999	1.08483e-78	11	Malat1
Tipin	1.42592e-81	1.0031	0.844	0.115	3.99088e-77	11	Tipin
Lig1	2.25477e-81	1.07088	0.695	0.054	6.31064e-77	11	Lig1
Mcm3	2.30544e-81	0.825662	0.695	0.053	6.45247e-77	11	Mcm3
Ptma.3	1.58383e-70	0.823191	1	0.98	4.43282e-66	11	Ptma
Ung	1.74636e-70	0.727722	0.546	0.029	4.88771e-66	11	Ung
Ranbp1.3	7.177e-70	1.04185	0.957	0.454	2.0087e-65	11	Ranbp1
Ccl5.3	4.4503e-69	-1.08607	0.972	0.999	1.24555e-64	11	Ccl5
Hells	6.6121e-69	0.762308	0.582	0.038	1.85059e-64	11	Hells
Ran.1	2.38889e-67	0.918208	0.972	0.666	6.68603e-63	11	Ran
Tcf19	1.5467e-66	0.763613	0.56	0.037	4.32891e-62	11	Tcf19
2810417H13Rik	2.4607e-66	1.35589	0.617	0.052	6.88701e-62	11	2810417H13Rik
Gmnn	4.02586e-66	0.875867	0.667	0.07	1.12676e-61	11	Gmnn
Mcm5	7.33997e-66	0.878713	0.667	0.07	2.05431e-61	11	Mcm5
Siva1	6.39177e-65	0.903424	0.801	0.139	1.78893e-60	11	Siva1
Tuba1b.8	1.63269e-63	1.14224	0.965	0.354	4.56958e-59	11	Tuba1b
Mcm2	2.5978e-61	0.733818	0.567	0.047	7.27072e-57	11	Mcm2
Cks1b.5	4.06183e-61	0.729993	0.652	0.088	1.13683e-56	11	Cks1b
Mcm7	5.72579e-60	0.783949	0.617	0.065	1.60253e-55	11	Mcm7
Mcm6	1.16563e-59	0.859606	0.78	0.144	3.26237e-55	11	Mcm6
Uhrf1	5.41693e-55	0.637924	0.418	0.018	1.51609e-50	11	Uhrf1
Pcna	1.90829e-54	0.947245	0.801	0.186	5.34093e-50	11	Pcna
Gins2	5.21037e-54	0.504523	0.426	0.021	1.45828e-49	11	Gins2
Hmgb2.6	9.55885e-54	0.887935	0.993	0.747	2.67533e-49	11	Hmgb2
Dctpp1	2.32107e-52	0.83922	0.695	0.12	6.49621e-48	11	Dctpp1
Dtl	2.04279e-50	0.620256	0.525	0.06	5.71736e-46	11	Dtl
Asf1b	6.18984e-49	0.693517	0.496	0.047	1.73241e-44	11	Asf1b
Cdca7	1.12446e-46	0.494594	0.362	0.015	3.14713e-42	11	Cdca7
Btg1.3	6.53402e-46	-0.997012	0.787	0.921	1.82874e-41	11	Btg1
Mcm4	1.09361e-45	0.531824	0.496	0.063	3.0608e-41	11	Mcm4
Ppia	4.1037e-45	0.535193	1	0.991	1.14854e-40	11	Ppia
Dhfr	6.81321e-45	0.480549	0.383	0.024	1.90688e-40	11	Dhfr
Rnaseh2b	1.11896e-44	0.593702	0.567	0.089	3.13174e-40	11	Rnaseh2b
Apitd1	1.64154e-44	0.364595	0.34	0.018	4.59435e-40	11	Apitd1
Dnmt1	3.04692e-44	0.474866	0.539	0.098	8.52771e-40	11	Dnmt1
Rfc4	6.65606e-44	0.508705	0.454	0.049	1.8629e-39	11	Rfc4
Tyms	2.21465e-43	0.651224	0.489	0.056	6.19837e-39	11	Tyms
Orc6	5.29799e-43	0.516627	0.454	0.052	1.4828e-38	11	Orc6
Pmf1	1.88623e-42	0.605592	0.638	0.139	5.27919e-38	11	Pmf1
Cbx5	2.04933e-42	0.442633	0.482	0.073	5.73566e-38	11	Cbx5
Rps27	6.14525e-42	-0.381652	1	0.999	1.71993e-37	11	Rps27
Dnajc9	1.08294e-41	0.689208	0.752	0.204	3.03095e-37	11	Dnajc9
Dtymk	1.13647e-41	0.528485	0.652	0.161	3.18075e-37	11	Dtymk
Gapdh	1.25545e-40	0.646475	0.986	0.778	3.51374e-36	11	Gapdh
Nrm	3.09772e-40	0.625416	0.532	0.086	8.66989e-36	11	Nrm
Tk1	5.06974e-40	0.57523	0.376	0.027	1.41892e-35	11	Tk1
Tubb5.8	1.03937e-39	0.915818	0.936	0.572	2.909e-35	11	Tubb5
Tmpo	1.7559e-39	0.530198	0.617	0.147	4.91442e-35	11	Tmpo
Top2a	8.90286e-39	0.477079	0.454	0.07	2.49173e-34	11	Top2a
Slc25a5.1	1.40719e-38	0.625247	0.979	0.8	3.93844e-34	11	Slc25a5
Hmgn2.5	3.1417e-38	0.697568	0.809	0.268	8.793e-34	11	Hmgn2
Smc2	3.39068e-38	0.556759	0.532	0.096	9.48984e-34	11	Smc2
Clspn	1.10556e-37	0.433722	0.319	0.018	3.09425e-33	11	Clspn
Txn1	1.46459e-37	0.654641	0.986	0.674	4.09908e-33	11	Txn1
2700029M09Rik	3.10947e-37	0.482319	0.638	0.177	8.70278e-33	11	2700029M09Rik
Hint1	4.10311e-37	0.585559	1	0.798	1.14838e-32	11	Hint1
Rfc3	5.57456e-37	0.410389	0.39	0.047	1.56021e-32	11	Rfc3
Nasp	7.29255e-37	0.524006	0.532	0.103	2.04104e-32	11	Nasp
Nme1.2	4.74923e-36	0.655282	0.979	0.637	1.32921e-31	11	Nme1
Prim1	5.03627e-36	0.438106	0.362	0.033	1.40955e-31	11	Prim1
Paics	7.16003e-36	0.381397	0.539	0.143	2.00395e-31	11	Paics
Mrpl42	1.45153e-35	0.425025	0.723	0.253	4.06253e-31	11	Mrpl42
Dek.3	1.56663e-35	0.783484	0.872	0.381	4.38467e-31	11	Dek
Snrpd1	2.14672e-35	0.675962	0.865	0.343	6.00825e-31	11	Snrpd1
Rfc5	2.6243e-35	0.460883	0.454	0.073	7.34488e-31	11	Rfc5
Pa2g4	4.13034e-35	0.503191	0.723	0.241	1.156e-30	11	Pa2g4
Cenpw	2.01015e-34	0.480771	0.475	0.088	5.62601e-30	11	Cenpw
Hnrnpd	2.16302e-34	0.251935	0.482	0.142	6.05386e-30	11	Hnrnpd
Rpa2	2.54839e-34	0.433082	0.532	0.13	7.13244e-30	11	Rpa2
Anapc15	2.57604e-34	0.352149	0.454	0.095	7.20981e-30	11	Anapc15
Syce2	7.78111e-34	0.48504	0.411	0.059	2.17778e-29	11	Syce2
Ddx39b	7.88292e-34	0.278473	0.674	0.273	2.20627e-29	11	Ddx39b
Mms22l	1.09186e-33	0.403592	0.326	0.029	3.0559e-29	11	Mms22l
Spc24	1.2243e-33	0.415215	0.39	0.057	3.42658e-29	11	Spc24
Vdac1	1.28734e-33	0.312287	0.61	0.218	3.603e-29	11	Vdac1
Vdac3	2.21296e-33	0.322784	0.645	0.237	6.19362e-29	11	Vdac3
Nap1l1	2.52452e-33	0.724742	0.823	0.325	7.06564e-29	11	Nap1l1
Srm.1	2.63688e-33	0.548799	0.468	0.085	7.3801e-29	11	Srm
Hcst.1	2.99789e-33	-0.619355	0.936	0.926	8.39049e-29	11	Hcst
Sdf2l1.1	4.30208e-33	0.468435	0.688	0.228	1.20407e-28	11	Sdf2l1
Rrm1	7.67005e-33	0.422253	0.362	0.038	2.14669e-28	11	Rrm1
Rad51	2.12155e-32	0.373121	0.27	0.013	5.9378e-28	11	Rad51
Cdk4	2.28342e-32	0.686701	0.816	0.318	6.39083e-28	11	Cdk4
Rexo2	2.62967e-32	0.365071	0.66	0.24	7.35992e-28	11	Rexo2
Chaf1b	3.60011e-32	0.341209	0.291	0.024	1.0076e-27	11	Chaf1b
Dazap1	4.47147e-32	0.253566	0.674	0.287	1.25148e-27	11	Dazap1
Hdac2	6.83775e-32	0.255473	0.426	0.117	1.91375e-27	11	Hdac2
Snhg6	1.36269e-31	0.310468	0.525	0.165	3.8139e-27	11	Snhg6
Naa50	1.61823e-31	0.397552	0.518	0.138	4.52909e-27	11	Naa50
Rbmxl1	1.99189e-31	0.424798	0.518	0.133	5.5749e-27	11	Rbmxl1
Gar1.1	2.36651e-31	0.319857	0.553	0.182	6.6234e-27	11	Gar1
Mrps18c	2.47291e-31	0.262052	0.596	0.232	6.92118e-27	11	Mrps18c
Dpy30	2.52472e-31	0.439004	0.695	0.248	7.06619e-27	11	Dpy30
Rpa3	3.20306e-31	0.448593	0.546	0.146	8.96471e-27	11	Rpa3
Ngfrap1	3.24602e-31	0.485698	0.716	0.251	9.08497e-27	11	Ngfrap1
Rrm2	3.34296e-31	0.498549	0.333	0.034	9.35626e-27	11	Rrm2
Pole4	3.53129e-31	0.426147	0.823	0.355	9.88338e-27	11	Pole4
Rps2.1	4.05083e-31	0.431284	1	0.994	1.13375e-26	11	Rps2
Exosc5	4.24597e-31	0.284806	0.496	0.173	1.18836e-26	11	Exosc5
Eif1ax	5.09214e-31	0.362718	0.688	0.266	1.42519e-26	11	Eif1ax
Ppil1	5.86052e-31	0.461551	0.489	0.109	1.64024e-26	11	Ppil1
Psmc3ip	7.36895e-31	0.328878	0.248	0.012	2.06242e-26	11	Psmc3ip
Nans	1.14075e-30	0.423074	0.617	0.198	3.19273e-26	11	Nans
Ldha.1	1.37712e-30	0.568368	0.993	0.676	3.85427e-26	11	Ldha
P4hb	2.09641e-30	0.367645	0.589	0.193	5.86744e-26	11	P4hb
Hnrnpab	2.88366e-30	0.552716	0.773	0.293	8.07079e-26	11	Hnrnpab
2700094K13Rik	3.1655e-30	0.451352	0.887	0.421	8.8596e-26	11	2700094K13Rik
Timm50	3.94292e-30	0.297776	0.404	0.096	1.10354e-25	11	Timm50
Apex1	4.27492e-30	0.299922	0.34	0.063	1.19646e-25	11	Apex1
Impdh2	7.99032e-30	0.622236	0.766	0.286	2.23633e-25	11	Impdh2
Hmgn1.1	1.11051e-29	0.615939	0.745	0.269	3.1081e-25	11	Hmgn1
Ezh2	1.20144e-29	0.467325	0.447	0.09	3.36258e-25	11	Ezh2
Phgdh.1	1.26014e-29	0.512085	0.582	0.16	3.52689e-25	11	Phgdh
Csrp1	1.4923e-29	0.471196	0.539	0.143	4.17665e-25	11	Csrp1
Mrpl28	1.58244e-29	0.265245	0.539	0.197	4.42892e-25	11	Mrpl28
Rpa1	1.87259e-29	0.390134	0.504	0.135	5.24102e-25	11	Rpa1
Ptges3	2.07218e-29	0.364519	0.688	0.271	5.79961e-25	11	Ptges3
Nup62	2.33629e-29	0.287561	0.34	0.06	6.5388e-25	11	Nup62
Cenpm	2.87066e-29	0.481011	0.326	0.032	8.03441e-25	11	Cenpm
Ptbp1	3.44743e-29	0.290526	0.532	0.183	9.64867e-25	11	Ptbp1
Cisd1	4.29765e-29	0.332081	0.454	0.121	1.20283e-24	11	Cisd1
C1qbp.1	4.91993e-29	0.455301	0.681	0.248	1.37699e-24	11	C1qbp
Rfc1	5.13548e-29	0.2978	0.397	0.093	1.43732e-24	11	Rfc1
H2afz.7	6.22493e-29	0.547917	1	0.962	1.74223e-24	11	H2afz
Smc3	6.84496e-29	0.256342	0.553	0.204	1.91577e-24	11	Smc3
Pdap1.1	8.95993e-29	0.312827	0.695	0.296	2.50771e-24	11	Pdap1
Lsm3	9.21211e-29	0.273773	0.66	0.283	2.57828e-24	11	Lsm3
Chek1	1.00574e-28	0.269204	0.199	0.005	2.81487e-24	11	Chek1
Hnrnpdl	1.03453e-28	0.446659	0.816	0.359	2.89544e-24	11	Hnrnpdl
Smc1a	1.17268e-28	0.32545	0.553	0.186	3.2821e-24	11	Smc1a
Lockd.4	1.17798e-28	0.367788	0.482	0.127	3.29694e-24	11	Lockd
Txnl1	1.30172e-28	0.304586	0.652	0.264	3.64326e-24	11	Txnl1
Rbm3	2.14051e-28	0.479533	1	0.912	5.99086e-24	11	Rbm3
Banf1	3.23029e-28	0.435564	0.745	0.303	9.04093e-24	11	Banf1
Timeless	3.72161e-28	0.310394	0.248	0.017	1.0416e-23	11	Timeless
Hsp90ab1.2	4.03475e-28	0.524396	0.986	0.853	1.12925e-23	11	Hsp90ab1
Rps17.2	4.049e-28	0.416932	1	0.987	1.13324e-23	11	Rps17
Ndufab1	6.33826e-28	0.476997	0.716	0.274	1.77395e-23	11	Ndufab1
Pola1	6.57449e-28	0.350875	0.27	0.023	1.84007e-23	11	Pola1
Slc29a1	6.67766e-28	0.414143	0.362	0.055	1.86894e-23	11	Slc29a1
Lsm2	9.42449e-28	0.437197	0.61	0.206	2.63773e-23	11	Lsm2
Usp1	1.27768e-27	0.402328	0.454	0.108	3.57598e-23	11	Usp1
Anp32b.1	1.34687e-27	0.578023	0.936	0.529	3.76961e-23	11	Anp32b
Ssrp1	1.3629e-27	0.536466	0.745	0.289	3.81449e-23	11	Ssrp1
Pold2	1.63687e-27	0.416941	0.44	0.098	4.58127e-23	11	Pold2
Rfc2.1	1.71948e-27	0.472697	0.723	0.281	4.81247e-23	11	Rfc2
Map1lc3b	2.107e-27	-0.315703	0.73	0.592	5.89706e-23	11	Map1lc3b
Rps27rt	2.37975e-27	-0.446214	1	0.996	6.66045e-23	11	Rps27rt
Osgep	2.61632e-27	0.288971	0.411	0.115	7.32255e-23	11	Osgep
Erh	2.69787e-27	0.592728	0.915	0.554	7.5508e-23	11	Erh
Pold1	3.77025e-27	0.399836	0.319	0.04	1.05522e-22	11	Pold1
Bcl7c	4.92169e-27	0.332632	0.539	0.185	1.37748e-22	11	Bcl7c
Nsun2	6.52736e-27	0.277077	0.44	0.137	1.82688e-22	11	Nsun2
2610524H06Rik	6.84727e-27	0.314644	0.34	0.063	1.91641e-22	11	2610524H06Rik
Saraf.1	7.51931e-27	-0.268476	0.617	0.492	2.1045e-22	11	Saraf
Psat1	8.36426e-27	0.300041	0.34	0.062	2.34099e-22	11	Psat1
Fam111a	9.1046e-27	0.278259	0.383	0.099	2.5482e-22	11	Fam111a
Smc6	1.09647e-26	0.314417	0.66	0.282	3.06881e-22	11	Smc6
Srsf7	1.32801e-26	0.48605	0.745	0.306	3.71684e-22	11	Srsf7
Rbbp7	1.5252e-26	0.493498	0.589	0.186	4.26872e-22	11	Rbbp7
Alyref	1.54197e-26	0.325079	0.319	0.05	4.31566e-22	11	Alyref
Slbp.1	1.65023e-26	0.529308	0.73	0.285	4.61866e-22	11	Slbp
Fen1	2.03984e-26	0.251829	0.319	0.059	5.70911e-22	11	Fen1
Ppih	2.13977e-26	0.297852	0.404	0.108	5.98879e-22	11	Ppih
Nop56	2.2152e-26	0.275147	0.525	0.197	6.19991e-22	11	Nop56
Tcp1	2.73787e-26	0.37668	0.73	0.32	7.66275e-22	11	Tcp1
Slmo2	2.98306e-26	0.310112	0.426	0.117	8.34897e-22	11	Slmo2
Wbp5	3.89768e-26	0.325608	0.574	0.213	1.09088e-21	11	Wbp5
Wdr76	4.3011e-26	0.297577	0.284	0.034	1.20379e-21	11	Wdr76
Cbx1	4.417e-26	0.298014	0.56	0.211	1.23623e-21	11	Cbx1
Mrto4.1	4.83087e-26	0.357151	0.39	0.087	1.35206e-21	11	Mrto4
Nudt21	5.18774e-26	0.369174	0.766	0.353	1.45194e-21	11	Nudt21
Srsf10	5.31579e-26	0.276669	0.532	0.201	1.48778e-21	11	Srsf10
Lsm6	5.76638e-26	0.403939	0.816	0.391	1.6139e-21	11	Lsm6
Uqcc2	6.54168e-26	0.37165	0.801	0.378	1.83089e-21	11	Uqcc2
Tnni1	7.01326e-26	0.591889	0.333	0.043	1.96287e-21	11	Tnni1
Tbc1d10c	9.52732e-26	-0.275874	0.574	0.472	2.66651e-21	11	Tbc1d10c
Stra13	1.00385e-25	0.416451	0.787	0.36	2.80957e-21	11	Stra13
Hmgb1	1.0538e-25	0.498037	1	0.826	2.94937e-21	11	Hmgb1
Cdt1	1.06818e-25	0.31643	0.326	0.057	2.98961e-21	11	Cdt1
Dbi.1	1.10423e-25	0.380462	0.823	0.399	3.09051e-21	11	Dbi
Mrps28.1	1.1161e-25	0.29347	0.362	0.087	3.12375e-21	11	Mrps28
Stip1	1.1854e-25	0.254401	0.362	0.096	3.31769e-21	11	Stip1
Phf5a	1.28125e-25	0.315704	0.624	0.262	3.58597e-21	11	Phf5a
Rad51ap1	1.55045e-25	0.265105	0.227	0.014	4.33939e-21	11	Rad51ap1
G3bp1.1	1.56601e-25	0.33309	0.702	0.316	4.38295e-21	11	G3bp1
Tomm40	1.64278e-25	0.259537	0.447	0.152	4.59781e-21	11	Tomm40
Topbp1	1.92073e-25	0.302465	0.312	0.052	5.37573e-21	11	Topbp1
Dscc1	2.16688e-25	0.263306	0.213	0.011	6.06468e-21	11	Dscc1
Chaf1a	2.5379e-25	0.30046	0.22	0.012	7.10308e-21	11	Chaf1a
Hnrnpu.1	3.26369e-25	0.335607	0.766	0.365	9.13442e-21	11	Hnrnpu
Galk1	3.43759e-25	0.341207	0.355	0.071	9.62114e-21	11	Galk1
Lmnb1	3.70963e-25	0.368279	0.333	0.052	1.03825e-20	11	Lmnb1
Nop58	4.34434e-25	0.326738	0.447	0.131	1.21589e-20	11	Nop58
Hprt	4.51248e-25	0.347827	0.688	0.302	1.26295e-20	11	Hprt
Nubp1	5.09491e-25	0.259901	0.546	0.217	1.42596e-20	11	Nubp1
Cacybp	5.24968e-25	0.273506	0.589	0.251	1.46928e-20	11	Cacybp
Mif.4	5.8081e-25	0.590768	0.915	0.539	1.62557e-20	11	Mif
Kpnb1	5.87754e-25	0.276395	0.426	0.129	1.64501e-20	11	Kpnb1
Ipo5	7.85186e-25	0.362746	0.333	0.055	2.19758e-20	11	Ipo5
Npm1	8.57036e-25	0.50165	0.993	0.883	2.39867e-20	11	Npm1
Prpf19	1.55103e-24	0.275518	0.461	0.162	4.34101e-20	11	Prpf19
Rabac1.2	1.5515e-24	-0.49239	0.596	0.598	4.34235e-20	11	Rabac1
Tpi1	1.56433e-24	0.498842	0.759	0.324	4.37825e-20	11	Tpi1
Runx3	1.67544e-24	-0.291774	0.44	0.36	4.68922e-20	11	Runx3
Nt5c3b	1.81058e-24	0.266425	0.376	0.107	5.06745e-20	11	Nt5c3b
Cd53.1	2.34658e-24	-0.502667	0.638	0.658	6.56759e-20	11	Cd53
U2af1	2.43937e-24	0.324278	0.752	0.361	6.8273e-20	11	U2af1
Dynll2	2.47835e-24	0.281151	0.532	0.203	6.9364e-20	11	Dynll2
Pfdn5	2.79663e-24	-0.453579	0.965	0.942	7.82721e-20	11	Pfdn5
Shisa5.1	3.55486e-24	-0.486541	0.972	0.958	9.94935e-20	11	Shisa5
Rtn3.1	3.70883e-24	0.260158	0.574	0.248	1.03803e-19	11	Rtn3
Phb2	3.9476e-24	0.353173	0.865	0.463	1.10485e-19	11	Phb2
Cmc2	4.34042e-24	0.399764	0.433	0.114	1.2148e-19	11	Cmc2
Atad2	4.59162e-24	0.36176	0.333	0.06	1.2851e-19	11	Atad2
Fkbp2	4.75238e-24	0.391603	0.525	0.175	1.3301e-19	11	Fkbp2
Ccne1	6.81912e-24	0.256639	0.227	0.018	1.90854e-19	11	Ccne1
Rps8	7.08137e-24	0.306012	1	0.998	1.98193e-19	11	Rps8
Stk17b	1.10937e-23	-0.440407	0.461	0.454	3.1049e-19	11	Stk17b
Nono	1.30216e-23	0.25463	0.723	0.367	3.64448e-19	11	Nono
Btg2.3	1.84067e-23	-0.555465	0.674	0.656	5.15168e-19	11	Btg2
Pcbd2	2.03445e-23	0.324658	0.589	0.234	5.69401e-19	11	Pcbd2
Gabarap.1	2.08266e-23	-0.331034	0.787	0.692	5.82895e-19	11	Gabarap
Mki67	2.24611e-23	0.348165	0.284	0.043	6.28642e-19	11	Mki67
Snrpe	2.90457e-23	0.481723	0.979	0.687	8.12931e-19	11	Snrpe
Naa10	4.76026e-23	0.315626	0.518	0.193	1.3323e-18	11	Naa10
Atpif1	5.43155e-23	0.480541	0.773	0.35	1.52018e-18	11	Atpif1
Prdx4	5.75561e-23	0.271293	0.27	0.039	1.61088e-18	11	Prdx4
Mrpl18	6.42167e-23	0.414774	0.78	0.371	1.7973e-18	11	Mrpl18
Nudc	6.77341e-23	0.484986	0.73	0.316	1.89574e-18	11	Nudc
Gimap3.2	9.0266e-23	-0.551319	0.426	0.497	2.52636e-18	11	Gimap3
Gltp	1.19053e-22	0.281472	0.702	0.345	3.33207e-18	11	Gltp
Ncapg2	1.27547e-22	0.269752	0.213	0.014	3.5698e-18	11	Ncapg2
Tyrobp.2	1.92226e-22	-0.468727	0.979	0.981	5.38003e-18	11	Tyrobp
Gtf3a	2.62821e-22	0.270634	0.638	0.295	7.35583e-18	11	Gtf3a
Pebp1	2.70227e-22	0.299889	0.809	0.435	7.56312e-18	11	Pebp1
Ppa1.2	3.12116e-22	0.329893	0.404	0.109	8.73549e-18	11	Ppa1
Gm6576	4.94032e-22	0.349454	0.823	0.43	1.3827e-17	11	Gm6576
Ypel3.4	5.06326e-22	-0.725874	0.44	0.596	1.4171e-17	11	Ypel3
Anapc5	5.45515e-22	0.434223	0.638	0.253	1.52679e-17	11	Anapc5
Fcer1g.2	6.23432e-22	-0.468362	0.979	0.983	1.74486e-17	11	Fcer1g
Mrpl20	7.42705e-22	0.264212	0.688	0.35	2.07868e-17	11	Mrpl20
Rbbp4.1	7.70057e-22	0.413704	0.723	0.325	2.15524e-17	11	Rbbp4
Rpl31.1	7.98254e-22	0.349637	1	0.986	2.23415e-17	11	Rpl31
Cbx3	8.75057e-22	0.509976	0.816	0.404	2.44911e-17	11	Cbx3
Cenph	8.79899e-22	0.270285	0.22	0.018	2.46266e-17	11	Cenph
Ccdc34	1.23574e-21	0.353619	0.326	0.062	3.4586e-17	11	Ccdc34
Sumo3	1.44648e-21	0.354576	0.582	0.23	4.04842e-17	11	Sumo3
Ier2.3	1.49877e-21	-0.550109	0.624	0.625	4.19477e-17	11	Ier2
Hmha1	1.51692e-21	-0.440744	0.596	0.593	4.24555e-17	11	Hmha1
Ubald2	1.57713e-21	-0.355867	0.73	0.656	4.41408e-17	11	Ubald2
Snrpf	1.993e-21	0.433772	0.979	0.709	5.57801e-17	11	Snrpf
Mrpl23	2.04022e-21	0.260133	0.773	0.419	5.71017e-17	11	Mrpl23
Prr13	2.51287e-21	-0.357388	0.66	0.624	7.03301e-17	11	Prr13
Pcna-ps2	2.75666e-21	0.297969	0.22	0.02	7.71534e-17	11	Pcna-ps2
Gimap1.1	2.75948e-21	-0.293589	0.745	0.631	7.72322e-17	11	Gimap1
Eny2	2.79823e-21	0.295791	0.61	0.267	7.8317e-17	11	Eny2
Rinl	2.8756e-21	-0.447567	0.447	0.475	8.04822e-17	11	Rinl
Ifngr1.6	3.26136e-21	-0.600133	0.61	0.622	9.1279e-17	11	Ifngr1
Syf2	3.32516e-21	-0.300118	0.461	0.41	9.30646e-17	11	Syf2
Srsf5.1	3.43752e-21	-0.32503	0.901	0.778	9.62093e-17	11	Srsf5
Ets1.1	3.61271e-21	-0.339457	0.596	0.539	1.01113e-16	11	Ets1
Pnisr	4.17421e-21	-0.30551	0.319	0.288	1.16828e-16	11	Pnisr
Prmt1	4.22573e-21	0.338302	0.567	0.232	1.1827e-16	11	Prmt1
Gimap6.1	4.9911e-21	-0.395125	0.816	0.774	1.39691e-16	11	Gimap6
Pkm.1	5.20615e-21	0.310235	0.844	0.472	1.4571e-16	11	Pkm
Raly	6.24395e-21	0.398537	0.887	0.502	1.74756e-16	11	Raly
Zfp367	6.62493e-21	0.262068	0.206	0.018	1.85419e-16	11	Zfp367
Bcl2.2	8.72526e-21	-0.629148	0.61	0.672	2.44203e-16	11	Bcl2
Arl6ip1	9.56546e-21	-0.411852	0.546	0.523	2.67718e-16	11	Arl6ip1
Zfp36l1	9.8781e-21	-0.263479	0.397	0.323	2.76468e-16	11	Zfp36l1
Arl6ip5	1.16566e-20	-0.37234	0.454	0.449	3.26244e-16	11	Arl6ip5
Vasp	1.25148e-20	-0.329087	0.787	0.688	3.50263e-16	11	Vasp
Nhp2.1	1.66692e-20	0.461395	0.738	0.342	4.66539e-16	11	Nhp2
Ifi203.1	1.75523e-20	-0.268154	0.475	0.384	4.91255e-16	11	Ifi203
Eif4a2	2.54005e-20	-0.361051	0.511	0.484	7.1091e-16	11	Eif4a2
Gimap5.1	2.60179e-20	-0.25039	0.823	0.684	7.2819e-16	11	Gimap5
Arsb.1	2.66454e-20	0.259244	0.61	0.281	7.45751e-16	11	Arsb
Rps20.3	3.52124e-20	0.314783	1	0.993	9.85525e-16	11	Rps20
Tmem147	5.0301e-20	0.256413	0.532	0.232	1.40782e-15	11	Tmem147
Lsm8	5.88376e-20	0.271843	0.596	0.272	1.64675e-15	11	Lsm8
Pik3r1.2	5.94201e-20	-0.251647	0.511	0.395	1.66305e-15	11	Pik3r1
Fkbp3	5.95127e-20	0.310698	0.745	0.384	1.66564e-15	11	Fkbp3
H2afv.3	6.04005e-20	0.392827	0.908	0.54	1.69049e-15	11	H2afv
Vgll4.1	6.68223e-20	-0.476816	0.511	0.516	1.87022e-15	11	Vgll4
Ndufb8	7.88197e-20	0.264734	0.816	0.467	2.206e-15	11	Ndufb8
Nucks1.1	8.70977e-20	0.321855	0.667	0.317	2.43769e-15	11	Nucks1
Fam32a	8.91047e-20	-0.251954	0.39	0.331	2.49386e-15	11	Fam32a
Il2rg.1	9.72365e-20	-0.300182	0.631	0.549	2.72146e-15	11	Il2rg
Glipr2	1.15019e-19	-0.336529	0.355	0.351	3.21915e-15	11	Glipr2
Snrpd2	1.17181e-19	0.404902	0.965	0.645	3.27967e-15	11	Snrpd2
Hn1l	1.18911e-19	0.264868	0.213	0.027	3.32809e-15	11	Hn1l
Use1	1.57424e-19	-0.45187	0.56	0.583	4.40598e-15	11	Use1
Lrrk1.1	1.59616e-19	-0.283525	0.333	0.304	4.46735e-15	11	Lrrk1
Mndal.1	1.83382e-19	-0.279115	0.44	0.374	5.13248e-15	11	Mndal
Junb.3	1.85687e-19	-0.611454	0.943	0.955	5.19701e-15	11	Junb
Prdx1	2.16651e-19	0.510007	0.865	0.499	6.06363e-15	11	Prdx1
Rpl28.1	2.68198e-19	0.34379	1	0.985	7.50632e-15	11	Rpl28
Birc5	3.33583e-19	0.254949	0.277	0.062	9.33631e-15	11	Birc5
Nhp2l1	3.44266e-19	0.367283	0.879	0.514	9.63532e-15	11	Nhp2l1
Cycs.4	3.78067e-19	0.417588	0.887	0.519	1.05813e-14	11	Cycs
Ak2	4.01633e-19	0.253301	0.333	0.098	1.12409e-14	11	Ak2
AB124611	4.44121e-19	-0.260538	0.454	0.396	1.24301e-14	11	AB124611
Slc25a4.1	4.79576e-19	0.31306	0.766	0.405	1.34224e-14	11	Slc25a4
Klrk1.2	4.9222e-19	-0.41	0.936	0.88	1.37763e-14	11	Klrk1
Bhlhe40.3	5.50709e-19	-0.372088	0.496	0.465	1.54132e-14	11	Bhlhe40
Ybx1.1	5.97724e-19	0.322943	0.766	0.407	1.67291e-14	11	Ybx1
Rplp0.2	7.51267e-19	0.268443	1	0.998	2.10265e-14	11	Rplp0
Tmem234.1	8.17771e-19	-0.307032	0.603	0.532	2.28878e-14	11	Tmem234
Got2	8.57571e-19	0.283799	0.369	0.115	2.40017e-14	11	Got2
Foxp1	8.80487e-19	-0.271086	0.468	0.398	2.46431e-14	11	Foxp1
Ywhab	9.93561e-19	0.276883	0.78	0.439	2.78078e-14	11	Ywhab
Dusp11	1.12142e-18	-0.290292	0.39	0.356	3.13862e-14	11	Dusp11
Tmem256	1.2245e-18	0.31278	0.78	0.423	3.42713e-14	11	Tmem256
Snrpb	1.24635e-18	0.40402	0.957	0.665	3.48829e-14	11	Snrpb
Hspa8.2	1.39889e-18	0.377764	1	0.928	3.91521e-14	11	Hspa8
Haus4	1.57435e-18	0.318897	0.369	0.105	4.40628e-14	11	Haus4
Rgs2.2	1.86145e-18	-0.339804	0.567	0.47	5.20982e-14	11	Rgs2
Klra8.5	2.13531e-18	-0.791338	0.504	0.516	5.97632e-14	11	Klra8
Ptpn22.1	2.22588e-18	-0.343734	0.496	0.453	6.2298e-14	11	Ptpn22
Ankrd44	2.32595e-18	-0.285568	0.504	0.432	6.50987e-14	11	Ankrd44
Satb1	2.56876e-18	-0.347078	0.348	0.334	7.18945e-14	11	Satb1
Socs3	2.82602e-18	-0.328069	0.404	0.375	7.90947e-14	11	Socs3
Klrb1c.1	2.92807e-18	-0.417975	0.851	0.782	8.19509e-14	11	Klrb1c
Akap13.1	3.07766e-18	-0.250355	0.56	0.475	8.61376e-14	11	Akap13
Cct4	3.21989e-18	0.257502	0.794	0.46	9.01182e-14	11	Cct4
Ptp4a2	3.34869e-18	-0.287784	0.525	0.474	9.37231e-14	11	Ptp4a2
Ltb.7	3.82432e-18	-0.7628	0.447	0.59	1.07035e-13	11	Ltb
Cd37	4.22173e-18	-0.290435	0.631	0.568	1.18158e-13	11	Cd37
Atp5g1.1	4.38613e-18	0.426511	0.936	0.622	1.22759e-13	11	Atp5g1
Neurl3.1	4.39637e-18	-0.315757	0.262	0.25	1.23046e-13	11	Neurl3
Laptm5	4.83865e-18	-0.292261	0.872	0.768	1.35424e-13	11	Laptm5
Hspd1.1	5.73229e-18	0.449223	0.567	0.228	1.60435e-13	11	Hspd1
4930523C07Rik	6.31945e-18	-0.281868	0.426	0.379	1.76869e-13	11	4930523C07Rik
Cit	7.16448e-18	0.27005	0.22	0.027	2.00519e-13	11	Cit
Nrgn.2	8.1946e-18	0.505712	0.56	0.215	2.2935e-13	11	Nrgn
1810037I17Rik	8.2549e-18	0.389192	0.823	0.459	2.31038e-13	11	1810037I17Rik
Cd82.3	9.22829e-18	-0.288912	0.426	0.374	2.58281e-13	11	Cd82
Cd27	1.08784e-17	-0.337223	0.589	0.535	3.04465e-13	11	Cd27
Ptprc.1	1.10335e-17	-0.418553	0.908	0.877	3.08805e-13	11	Ptprc
Tkt.1	1.32488e-17	0.458921	0.674	0.308	3.70806e-13	11	Tkt
Hnrnpa3	1.40487e-17	0.445432	0.929	0.614	3.93194e-13	11	Hnrnpa3
Tpst2	1.75562e-17	-0.277992	0.426	0.383	4.91362e-13	11	Tpst2
Fbl.1	1.91137e-17	0.333305	0.716	0.373	5.34953e-13	11	Fbl
Fam53b	2.00576e-17	-0.272781	0.34	0.3	5.61373e-13	11	Fam53b
Mettl9	2.26039e-17	0.252474	0.376	0.13	6.32639e-13	11	Mettl9
Gem.4	2.29504e-17	-0.413089	0.461	0.438	6.42337e-13	11	Gem
Bzw2	2.52165e-17	0.340915	0.319	0.083	7.05759e-13	11	Bzw2
Pole3	2.86834e-17	0.262212	0.348	0.111	8.02791e-13	11	Pole3
Mrpl12.1	3.07865e-17	0.32453	0.61	0.285	8.61651e-13	11	Mrpl12
Gm8186	3.98182e-17	0.28892	0.887	0.556	1.11443e-12	11	Gm8186
Eif4a1	3.98552e-17	0.428559	0.943	0.655	1.11547e-12	11	Eif4a1
Uqcr10	4.04967e-17	0.377834	0.943	0.634	1.13342e-12	11	Uqcr10
Klf6.2	4.27979e-17	-0.365943	0.447	0.425	1.19783e-12	11	Klf6
Mbnl1	4.51301e-17	-0.337824	0.879	0.815	1.2631e-12	11	Mbnl1
Ddx5	4.76606e-17	-0.451406	0.901	0.882	1.33392e-12	11	Ddx5
Ctla2a.1	4.95422e-17	-0.495844	0.801	0.796	1.38659e-12	11	Ctla2a
Sqstm1.2	5.30489e-17	-0.37149	0.262	0.288	1.48473e-12	11	Sqstm1
Wipf1	5.33421e-17	-0.250252	0.34	0.302	1.49294e-12	11	Wipf1
Ywhah.1	5.60991e-17	0.335871	0.801	0.46	1.5701e-12	11	Ywhah
Fam162a	5.93898e-17	0.308541	0.482	0.199	1.6622e-12	11	Fam162a
Nop10.1	6.22548e-17	0.435027	0.915	0.602	1.74239e-12	11	Nop10
Hspe1.1	6.76021e-17	0.429479	0.922	0.607	1.89205e-12	11	Hspe1
H2-D1.1	7.19006e-17	-0.344343	0.986	0.994	2.01235e-12	11	H2-D1
Tmem59.1	7.58009e-17	-0.37353	0.305	0.344	2.12151e-12	11	Tmem59
Zfp36l2.3	9.15978e-17	-0.466758	0.518	0.529	2.56364e-12	11	Zfp36l2
Atp5b	1.29161e-16	0.399519	0.972	0.713	3.61495e-12	11	Atp5b
Hnrnpa2b1.1	1.42945e-16	0.303735	0.95	0.648	4.00074e-12	11	Hnrnpa2b1
Set.1	1.70764e-16	0.441295	0.83	0.478	4.77933e-12	11	Set
Peli1	1.80432e-16	-0.266217	0.326	0.288	5.04993e-12	11	Peli1
Epsti1.1	1.82361e-16	-0.380461	0.766	0.756	5.10391e-12	11	Epsti1
Txk.3	2.39248e-16	-0.36087	0.716	0.651	6.69608e-12	11	Txk
Tcf3.1	2.81659e-16	0.2557	0.39	0.148	7.88306e-12	11	Tcf3
Il2rb.1	2.92739e-16	-0.269769	0.816	0.729	8.19319e-12	11	Il2rb
Ppp1r18	2.94618e-16	-0.32546	0.518	0.501	8.24578e-12	11	Ppp1r18
Lsm5	3.6145e-16	0.279394	0.766	0.44	1.01162e-11	11	Lsm5
Mkrn1.1	3.66717e-16	-0.342013	0.447	0.361	1.02637e-11	11	Mkrn1
Nabp1.2	3.67284e-16	-0.254946	0.305	0.27	1.02795e-11	11	Nabp1
Rsrp1	3.79093e-16	-0.266098	0.617	0.531	1.06101e-11	11	Rsrp1
Hnrnpf	4.86426e-16	0.344851	0.979	0.74	1.36141e-11	11	Hnrnpf
Evl.1	4.95017e-16	-0.300285	0.66	0.624	1.38545e-11	11	Evl
Jak1	5.44451e-16	-0.338627	0.837	0.787	1.52381e-11	11	Jak1
Hsp90aa1	5.50724e-16	0.432335	0.858	0.521	1.54137e-11	11	Hsp90aa1
Prex1.1	6.60939e-16	-0.360981	0.312	0.323	1.84984e-11	11	Prex1
Rps27l	9.23678e-16	0.422781	0.894	0.589	2.58519e-11	11	Rps27l
Kmt2e	9.89545e-16	-0.283159	0.369	0.344	2.76954e-11	11	Kmt2e
Lsm4	1.24047e-15	0.340461	0.915	0.602	3.47184e-11	11	Lsm4
Pdcd4.2	1.47801e-15	-0.420072	0.667	0.641	4.13664e-11	11	Pdcd4
Ccnd2.3	1.50845e-15	-0.277985	0.716	0.609	4.22185e-11	11	Ccnd2
Ndufa6	1.56424e-15	-0.294219	0.773	0.702	4.378e-11	11	Ndufa6
Eef1g.1	2.45013e-15	0.314878	1	0.91	6.85741e-11	11	Eef1g
Cytip	2.81115e-15	-0.25427	0.355	0.32	7.86785e-11	11	Cytip
Hpcal1	3.08435e-15	-0.276745	0.319	0.307	8.63247e-11	11	Hpcal1
Vps37b.5	3.40519e-15	-0.425025	0.574	0.545	9.53045e-11	11	Vps37b
Traf1.1	3.67032e-15	-0.399204	0.376	0.393	1.02725e-10	11	Traf1
Ccr2.1	3.7377e-15	-0.27472	0.78	0.678	1.04611e-10	11	Ccr2
Anapc11	4.01767e-15	0.326503	0.645	0.332	1.12447e-10	11	Anapc11
Clk1.1	4.27987e-15	-0.405096	0.411	0.455	1.19785e-10	11	Clk1
Eif5a.1	4.74276e-15	0.377999	0.972	0.85	1.3274e-10	11	Eif5a
Hnrnpa1.2	4.95113e-15	0.33111	0.908	0.601	1.38572e-10	11	Hnrnpa1
Rpl15	4.99229e-15	0.276622	1	0.969	1.39724e-10	11	Rpl15
Rnf138.1	5.46871e-15	-0.366666	0.241	0.282	1.53058e-10	11	Rnf138
Cmtm7.2	6.33226e-15	0.355829	0.823	0.502	1.77227e-10	11	Cmtm7
Crip1	6.60689e-15	0.360571	0.986	0.947	1.84914e-10	11	Crip1
Fam103a1.1	6.7465e-15	-0.308391	0.34	0.343	1.88821e-10	11	Fam103a1
Tagln2	9.47609e-15	0.342992	0.957	0.711	2.65217e-10	11	Tagln2
Ms4a4b.1	1.09631e-14	-0.38765	0.908	0.884	3.06836e-10	11	Ms4a4b
Cox5a	1.19152e-14	0.377083	0.929	0.653	3.33484e-10	11	Cox5a
Cdkn2d.1	1.19787e-14	-0.418987	0.255	0.304	3.3526e-10	11	Cdkn2d
Slfn2.1	1.2324e-14	-0.460476	0.305	0.369	3.44924e-10	11	Slfn2
H2-K1.4	1.30366e-14	-0.401608	0.979	0.984	3.64868e-10	11	H2-K1
Serbp1	1.70052e-14	0.353338	0.972	0.783	4.7594e-10	11	Serbp1
Uqcr11	1.84931e-14	0.280833	0.865	0.56	5.17585e-10	11	Uqcr11
Srsf3	2.26696e-14	0.44286	0.872	0.588	6.34478e-10	11	Srsf3
Ndufb7	2.52348e-14	0.253894	0.957	0.691	7.06271e-10	11	Ndufb7
Cdc42ep3.1	4.54266e-14	-0.266906	0.298	0.27	1.2714e-09	11	Cdc42ep3
Krit1.1	4.6625e-14	-0.370659	0.284	0.328	1.30494e-09	11	Krit1
Gm8730.1	5.42555e-14	0.258385	1	0.987	1.5185e-09	11	Gm8730
Rps26.1	5.87953e-14	0.288952	1	0.972	1.64556e-09	11	Rps26
Fyb	6.07421e-14	-0.299195	0.418	0.403	1.70005e-09	11	Fyb
Atp5o	6.33759e-14	0.302123	0.894	0.594	1.77376e-09	11	Atp5o
Xcl1.7	1.01939e-13	-0.535465	0.801	0.795	2.85306e-09	11	Xcl1
Hist1h2ap	1.11703e-13	0.342516	0.206	0.038	3.12635e-09	11	Hist1h2ap
Tecpr1.1	1.17215e-13	-0.478802	0.27	0.371	3.28061e-09	11	Tecpr1
Lyar	1.62534e-13	0.280935	0.418	0.168	4.549e-09	11	Lyar
Zbtb20.1	2.1493e-13	-0.398559	0.298	0.318	6.01546e-09	11	Zbtb20
Pnrc1	3.11846e-13	-0.315987	0.34	0.35	8.72795e-09	11	Pnrc1
Rhof	3.16197e-13	-0.291649	0.163	0.192	8.84971e-09	11	Rhof
Minos1	3.28322e-13	0.309385	0.915	0.637	9.18907e-09	11	Minos1
BC031181	3.41572e-13	-0.296165	0.277	0.307	9.55992e-09	11	BC031181
Lat.1	4.2965e-13	-0.27003	0.234	0.236	1.20251e-08	11	Lat
Gna13	5.06094e-13	-0.261378	0.255	0.252	1.41646e-08	11	Gna13
Rbm39	5.07062e-13	-0.34641	0.943	0.926	1.41917e-08	11	Rbm39
Pbxip1.1	6.90516e-13	-0.361286	0.213	0.272	1.93262e-08	11	Pbxip1
H2-Q4.1	7.85702e-13	-0.289655	0.199	0.226	2.19902e-08	11	H2-Q4
Psma7	9.67015e-13	0.291776	0.922	0.653	2.70648e-08	11	Psma7
Atp5j	1.03509e-12	0.339498	0.957	0.794	2.897e-08	11	Atp5j
Stat4	1.12342e-12	-0.314039	0.234	0.264	3.14422e-08	11	Stat4
Atp5j2.1	1.23054e-12	0.285524	0.986	0.812	3.44404e-08	11	Atp5j2
Atp5g2	1.29374e-12	0.315112	0.979	0.828	3.62092e-08	11	Atp5g2
Ndufa4	1.53113e-12	0.288011	0.972	0.783	4.28532e-08	11	Ndufa4
Ncl.1	1.63714e-12	0.322894	0.929	0.668	4.58204e-08	11	Ncl
Cox7a2l	1.96741e-12	-0.2796	0.915	0.865	5.50637e-08	11	Cox7a2l
Cox7b	2.08232e-12	0.29021	0.957	0.721	5.82799e-08	11	Cox7b
Cd244.1	2.53552e-12	-0.254279	0.305	0.292	7.0964e-08	11	Cd244
Ppp1r15a.4	2.6637e-12	-0.387266	0.369	0.389	7.45517e-08	11	Ppp1r15a
AW112010.1	3.18028e-12	-0.396315	0.993	0.994	8.90097e-08	11	AW112010
Erdr1	4.12888e-12	0.272743	0.326	0.117	1.15559e-07	11	Erdr1
Supt16	5.08894e-12	0.26213	0.348	0.14	1.42429e-07	11	Supt16
Ogt.1	6.70273e-12	-0.390558	0.284	0.347	1.87596e-07	11	Ogt
Rps12-ps3.1	6.84236e-12	0.261773	1	0.973	1.91504e-07	11	Rps12-ps3
Ier5	7.79676e-12	-0.275322	0.27	0.267	2.18216e-07	11	Ier5
Gltscr2.1	8.06847e-12	-0.279657	0.83	0.779	2.2582e-07	11	Gltscr2
Ptpn18	1.00499e-11	-0.304768	0.979	0.961	2.81278e-07	11	Ptpn18
Jun.1	1.09867e-11	-0.392871	0.27	0.299	3.07497e-07	11	Jun
Fasl.1	1.29529e-11	-0.34235	0.128	0.183	3.62525e-07	11	Fasl
Samhd1.1	1.45742e-11	-0.355366	0.241	0.286	4.07903e-07	11	Samhd1
Cd7.4	1.68926e-11	-0.337269	0.83	0.794	4.72791e-07	11	Cd7
Vim.6	1.93357e-11	0.379734	0.915	0.667	5.41167e-07	11	Vim
Cox5b	2.14944e-11	0.254571	0.979	0.787	6.01584e-07	11	Cox5b
Qrfp.2	3.12224e-11	-0.257542	0.163	0.18	8.73854e-07	11	Qrfp
2810474O19Rik	3.90875e-11	-0.288364	0.227	0.24	1.09398e-06	11	2810474O19Rik
H2-T23.1	4.25515e-11	-0.280525	0.454	0.453	1.19093e-06	11	H2-T23
Zfp512.1	4.48972e-11	-0.275295	0.362	0.355	1.25658e-06	11	Zfp512
Avl9	4.62534e-11	-0.270113	0.206	0.225	1.29454e-06	11	Avl9
Trim12a	6.28196e-11	-0.323072	0.255	0.302	1.7582e-06	11	Trim12a
Cd28.3	9.78324e-11	-0.316775	0.461	0.438	2.73813e-06	11	Cd28
Sumo2	1.14261e-10	0.283922	0.972	0.827	3.19794e-06	11	Sumo2
Adgre5.1	1.33222e-10	-0.300272	0.305	0.327	3.72863e-06	11	Adgre5
Nisch	1.58253e-10	-0.255183	0.206	0.215	4.42918e-06	11	Nisch
Npm3	2.13654e-10	0.251643	0.681	0.416	5.97974e-06	11	Npm3
Tnfaip3.4	2.34235e-10	-0.379381	0.298	0.336	6.55578e-06	11	Tnfaip3
Klrb1a.1	2.81471e-10	-0.25744	0.454	0.433	7.8778e-06	11	Klrb1a
Lamb3.1	3.50519e-10	-0.32649	0.184	0.225	9.81034e-06	11	Lamb3
Spty2d1	4.22775e-10	-0.255417	0.191	0.208	1.18326e-05	11	Spty2d1
Lgals1.4	4.52384e-10	0.339509	0.965	0.918	1.26613e-05	11	Lgals1
Gzmb.6	4.52987e-10	-0.264796	0.362	0.271	1.26782e-05	11	Gzmb
Klra9.3	5.38135e-10	-0.621377	0.262	0.333	1.50613e-05	11	Klra9
Zdhhc20	6.70557e-10	-0.321198	0.184	0.241	1.87675e-05	11	Zdhhc20
Ifng.5	1.14121e-09	-0.360285	0.333	0.313	3.19401e-05	11	Ifng
PISD.2	1.52186e-09	-0.302466	0.333	0.316	4.25938e-05	11	PISD
Bnip3l.1	1.60842e-09	-0.333025	0.348	0.362	4.50166e-05	11	Bnip3l
Klf2.2	1.91757e-09	-0.273313	0.177	0.206	5.3669e-05	11	Klf2
Mxd4	2.02179e-09	-0.284927	0.149	0.195	5.6586e-05	11	Mxd4
Cd44	2.40493e-09	-0.296685	0.199	0.238	6.7309e-05	11	Cd44
Ubxn6.1	3.13374e-09	-0.289041	0.142	0.197	8.77072e-05	11	Ubxn6
Pim1.2	4.11754e-09	-0.335904	0.78	0.754	0.000115242	11	Pim1
Xist	5.55116e-09	0.299468	0.965	0.87	0.000155366	11	Xist
Ankrd12	8.79268e-09	-0.250684	0.206	0.22	0.00024609	11	Ankrd12
Snrpg	8.94555e-09	0.263242	0.965	0.817	0.000250368	11	Snrpg
Tax1bp1.1	1.11853e-08	-0.260157	0.291	0.311	0.000313054	11	Tax1bp1
Arid4b	1.66005e-08	-0.258757	0.163	0.199	0.000464614	11	Arid4b
Ssh2	1.72659e-08	-0.274634	0.184	0.228	0.000483239	11	Ssh2
Tnrc6b	2.01341e-08	-0.342633	0.149	0.231	0.000563514	11	Tnrc6b
Klrc1.3	3.583e-08	-0.297903	0.461	0.449	0.00100281	11	Klrc1
Pyhin1.1	4.2218e-08	-0.256085	0.113	0.153	0.0011816	11	Pyhin1
Mirt1	5.55132e-08	-0.255851	0.135	0.166	0.0015537	11	Mirt1
Grap	5.95012e-08	-0.304307	0.156	0.231	0.00166532	11	Grap
Gm26740.3	6.21101e-08	-0.324485	0.099	0.173	0.00173834	11	Gm26740
Id2.3	6.82251e-08	-0.314069	0.901	0.876	0.00190948	11	Id2
Serpina3g.7	1.35167e-07	-0.368182	0.461	0.506	0.00378306	11	Serpina3g
Rsbn1	1.46583e-07	-0.252014	0.099	0.151	0.00410257	11	Rsbn1
Pttg1.1	1.53357e-07	-0.254898	0.092	0.151	0.00429215	11	Pttg1
Cd3g.5	1.58007e-07	-0.435949	0.199	0.222	0.0044223	11	Cd3g
Phactr3.2	1.94236e-07	-0.32354	0.078	0.146	0.00543628	11	Phactr3
Klra4.6	2.4142e-07	-0.393494	0.525	0.477	0.00675685	11	Klra4
Chd2.1	2.41926e-07	-0.296541	0.106	0.169	0.00677104	11	Chd2
Ccl4.7	3.86548e-07	-0.457254	0.56	0.497	0.0108187	11	Ccl4
H3f3b.3	6.64626e-07	-0.292662	0.993	0.991	0.0186015	11	H3f3b
Hist1h2al	8.71548e-07	0.475061	0.22	0.074	0.0243929	11	Hist1h2al
Spry2.3	9.126e-07	-0.413232	0.468	0.461	0.0255418	11	Spry2
Rgs1.2	1.05083e-06	-0.285743	0.312	0.302	0.0294106	11	Rgs1
Hmgb2.7	0	2.04101	0.976	0.745	4.1744e-304	12	Hmgb2
Birc5.1	1.0254e-202	2.10829	0.899	0.031	2.86989e-198	12	Birc5
Tubb5.9	3.80669e-197	1.92731	0.911	0.571	1.06542e-192	12	Tubb5
Tuba1b.9	5.52992e-178	2.14489	0.821	0.356	1.54771e-173	12	Tuba1b
Ccnb2	3.25017e-170	1.82881	0.804	0.02	9.09656e-166	12	Ccnb2
Cdca3	1.77426e-169	1.67824	0.815	0.022	4.9658e-165	12	Cdca3
H2afx.6	3.05139e-166	2.00742	0.792	0.183	8.54022e-162	12	H2afx
Stmn1.10	2.12114e-163	2.22895	0.929	0.145	5.93664e-159	12	Stmn1
Ube2c	9.02711e-162	2.19734	0.78	0.02	2.52651e-157	12	Ube2c
Cks1b.6	1.31723e-159	1.70084	0.857	0.074	3.68666e-155	12	Cks1b
Hmgn2.6	1.42126e-154	1.56935	0.911	0.259	3.97782e-150	12	Hmgn2
H2afv.4	1.42602e-154	1.36004	0.929	0.536	3.99116e-150	12	H2afv
Ube2s.3	1.89339e-151	1.45285	0.893	0.458	5.29921e-147	12	Ube2s
Lockd.5	4.92804e-145	1.60919	0.905	0.104	1.37926e-140	12	Lockd
Mki67.1	6.14834e-136	1.51846	0.708	0.021	1.7208e-131	12	Mki67
Cdca8	1.74182e-135	1.24962	0.702	0.018	4.87502e-131	12	Cdca8
Ptma.4	1.07285e-132	1.09063	0.964	0.981	3.00269e-128	12	Ptma
Ccna2	3.58979e-132	1.40429	0.655	0.012	1.00471e-127	12	Ccna2
Hist1h2al.1	1.83939e-131	2.42641	0.69	0.051	5.14808e-127	12	Hist1h2al
Rps27.1	2.48684e-130	-0.58883	0.988	1	6.96017e-126	12	Rps27
2810417H13Rik.1	8.60962e-122	1.89137	0.738	0.042	2.40966e-117	12	2810417H13Rik
Nusap1	1.1107e-121	1.41542	0.607	0.012	3.10862e-117	12	Nusap1
Cenpf	4.65109e-120	1.26529	0.589	0.009	1.30175e-115	12	Cenpf
Cenpa.1	3.46097e-118	1.63676	0.81	0.12	9.68657e-114	12	Cenpa
Cdkn3	6.94091e-113	0.91349	0.542	0.006	1.94262e-108	12	Cdkn3
Top2a.1	1.63472e-111	1.73826	0.661	0.057	4.57526e-107	12	Top2a
Hmgb1.1	9.92186e-110	0.998787	0.952	0.827	2.77693e-105	12	Hmgb1
Hist1h2ap.1	1.91079e-109	1.51097	0.583	0.018	5.34791e-105	12	Hist1h2ap
Tpx2	4.3533e-106	0.862568	0.53	0.008	1.2184e-101	12	Tpx2
H2afz.8	1.32263e-105	1.04936	0.964	0.964	3.70178e-101	12	H2afz
Ccl5.4	2.24203e-103	-1.1715	0.994	0.998	6.275e-99	12	Ccl5
Cdk1	5.5218e-101	1.09812	0.542	0.013	1.54544e-96	12	Cdk1
Prc1	1.95615e-98	0.960387	0.5	0.008	5.47488e-94	12	Prc1
Spc24.1	9.38668e-96	1.13879	0.637	0.043	2.62714e-91	12	Spc24
Cks2.1	3.99367e-91	1.42762	0.78	0.135	1.11775e-86	12	Cks2
Tubb4b.3	4.65098e-88	1.4029	0.78	0.293	1.30172e-83	12	Tubb4b
Malat1.3	7.88254e-88	-0.761842	0.982	0.999	2.20616e-83	12	Malat1
Cenpe	1.39434e-87	0.778132	0.464	0.008	3.90248e-83	12	Cenpe
Mxd3	4.25776e-79	0.749863	0.399	0.005	1.19166e-74	12	Mxd3
Hmmr	5.41879e-79	0.737823	0.369	0.002	1.51661e-74	12	Hmmr
Rps14	8.57658e-78	-0.404154	0.982	1	2.40041e-73	12	Rps14
Kif11	1.18075e-77	0.695315	0.411	0.007	3.30468e-73	12	Kif11
Cdc20	7.3649e-76	0.892922	0.44	0.012	2.06129e-71	12	Cdc20
Rrm2.1	2.45726e-75	1.49692	0.488	0.024	6.87738e-71	12	Rrm2
Asf1b.1	3.1897e-73	0.920406	0.56	0.041	8.92732e-69	12	Asf1b
Fbxo5	1.09909e-72	0.788114	0.435	0.013	3.07615e-68	12	Fbxo5
Smc4.1	1.78422e-72	1.15725	0.792	0.241	4.99367e-68	12	Smc4
Kif23	1.16352e-71	0.593299	0.399	0.008	3.25647e-67	12	Kif23
Cenpw.1	8.64997e-71	0.909637	0.649	0.076	2.42095e-66	12	Cenpw
Cenpm.1	3.14402e-69	0.634189	0.47	0.023	8.7995e-65	12	Cenpm
Cit.1	3.9334e-69	0.632579	0.435	0.016	1.10088e-64	12	Cit
Kif22	8.34307e-69	0.650565	0.399	0.01	2.33506e-64	12	Kif22
Racgap1	2.68492e-68	0.862227	0.631	0.073	7.51455e-64	12	Racgap1
Ccdc34.1	2.00701e-67	0.849911	0.56	0.049	5.61722e-63	12	Ccdc34
Smc2.1	2.17156e-67	1.01511	0.649	0.087	6.07776e-63	12	Smc2
Hist1h1b	6.24376e-67	0.619627	0.363	0.006	1.7475e-62	12	Hist1h1b
Sgol1	5.46236e-66	0.544794	0.351	0.006	1.52881e-61	12	Sgol1
Spc25	4.07591e-65	0.766669	0.405	0.014	1.14077e-60	12	Spc25
Aurkb	1.07967e-64	0.665943	0.375	0.01	3.02179e-60	12	Aurkb
Ckap2l	7.28836e-62	0.445196	0.31	0.003	2.03987e-57	12	Ckap2l
Gm10282	8.232e-62	0.731692	0.565	0.061	2.30397e-57	12	Gm10282
Rpl13a	2.87915e-59	-0.333064	0.976	1	8.05815e-55	12	Rpl13a
Fam64a	6.3365e-59	0.432092	0.28	0.002	1.77346e-54	12	Fam64a
Tk1.1	6.59168e-59	0.766124	0.417	0.022	1.84488e-54	12	Tk1
Bub1b	2.43942e-58	0.440309	0.298	0.003	6.82745e-54	12	Bub1b
Ran.2	1.28366e-57	0.814159	0.911	0.666	3.59269e-53	12	Ran
Ppia.1	2.4005e-56	0.5496	0.952	0.993	6.71853e-52	12	Ppia
Knstrn	2.95489e-56	0.705935	0.458	0.035	8.27014e-52	12	Knstrn
Ccnb1	5.59129e-56	0.568166	0.286	0.003	1.56489e-51	12	Ccnb1
Incenp	1.12644e-55	0.650872	0.435	0.031	3.15269e-51	12	Incenp
Rad21	3.64182e-55	0.690043	0.679	0.138	1.01927e-50	12	Rad21
Tmpo.1	2.95557e-54	0.997404	0.649	0.142	8.27206e-50	12	Tmpo
Cdca2	3.41293e-53	0.499602	0.339	0.012	9.55212e-49	12	Cdca2
Depdc1a	3.53157e-53	0.380776	0.238	0.001	9.88416e-49	12	Depdc1a
Lmnb1.1	5.6808e-52	0.692828	0.464	0.044	1.58994e-47	12	Lmnb1
Ska1	3.66936e-51	0.483342	0.28	0.005	1.02698e-46	12	Ska1
Pmf1.1	4.26232e-51	0.821063	0.661	0.134	1.19294e-46	12	Pmf1
Dlgap5	5.1475e-51	0.559781	0.304	0.008	1.44068e-46	12	Dlgap5
Neil3	6.8258e-51	0.502843	0.286	0.006	1.9104e-46	12	Neil3
Rpl37a	9.14197e-51	-0.317053	0.976	1	2.55865e-46	12	Rpl37a
Arhgap11a	9.94205e-51	0.529775	0.327	0.012	2.78258e-46	12	Arhgap11a
Rps27rt.1	1.38452e-50	-0.585949	0.952	0.998	3.87499e-46	12	Rps27rt
Rps23	2.1455e-50	-0.333196	0.97	1	6.00482e-46	12	Rps23
Ncapd2	3.42451e-50	0.563973	0.393	0.027	9.58453e-46	12	Ncapd2
Kifc1	4.01926e-50	0.466609	0.28	0.005	1.12491e-45	12	Kifc1
2700094K13Rik.1	1.42404e-49	0.832065	0.857	0.418	3.98559e-45	12	2700094K13Rik
Bub1	3.78217e-49	0.3398	0.244	0.002	1.05855e-44	12	Bub1
Nrm.1	4.51061e-49	0.789701	0.548	0.082	1.26243e-44	12	Nrm
Dek.4	6.11258e-49	1.06743	0.821	0.379	1.71079e-44	12	Dek
Rpl36	7.97911e-49	-0.410244	0.958	0.999	2.23319e-44	12	Rpl36
Tacc3	1.06463e-47	0.480187	0.333	0.016	2.97968e-43	12	Tacc3
Sapcd2	1.33771e-47	0.355529	0.232	0.002	3.74398e-43	12	Sapcd2
Plk1	4.86954e-47	0.402077	0.268	0.006	1.36289e-42	12	Plk1
Tyrobp.3	6.83549e-47	-0.602661	0.952	0.982	1.91312e-42	12	Tyrobp
Ezh2.1	1.18148e-46	0.70306	0.536	0.083	3.30672e-42	12	Ezh2
Calm3	1.22394e-46	0.85427	0.881	0.413	3.42556e-42	12	Calm3
Esco2	3.10985e-46	0.577381	0.268	0.006	8.70384e-42	12	Esco2
Cmc2.1	1.05881e-45	0.735142	0.577	0.105	2.96339e-41	12	Cmc2
Casc5	1.35024e-45	0.387899	0.268	0.006	3.77905e-41	12	Casc5
Kif15	5.30094e-45	0.372677	0.262	0.006	1.48363e-40	12	Kif15
H3f3a.2	7.5202e-45	0.909539	0.988	0.933	2.10475e-40	12	H3f3a
Anp32b.2	1.40725e-44	0.797369	0.875	0.528	3.9386e-40	12	Anp32b
Ndc80	2.07233e-44	0.490042	0.304	0.013	5.80002e-40	12	Ndc80
Rpl38	2.14186e-44	-0.430402	0.976	0.998	5.99464e-40	12	Rpl38
Cdca5	3.26911e-44	0.389593	0.262	0.006	9.14958e-40	12	Cdca5
Vim.7	6.39918e-44	0.860636	0.911	0.666	1.791e-39	12	Vim
Diaph3	2.6765e-43	0.549614	0.262	0.007	7.49099e-39	12	Diaph3
Nuf2	2.71464e-43	0.329895	0.232	0.003	7.59773e-39	12	Nuf2
Gmnn.1	3.60297e-43	0.674463	0.494	0.074	1.0084e-38	12	Gmnn
Hjurp.1	1.09634e-42	0.577015	0.506	0.088	3.06843e-38	12	Hjurp
Kif4	1.12016e-42	0.316562	0.226	0.003	3.13511e-38	12	Kif4
Hist1h2ae	1.23454e-42	0.485865	0.274	0.009	3.45523e-38	12	Hist1h2ae
Mad2l1	4.28826e-42	0.527402	0.345	0.026	1.2002e-37	12	Mad2l1
Nucks1.2	9.19548e-42	0.843224	0.774	0.309	2.57363e-37	12	Nucks1
Clspn.1	1.60256e-41	0.53096	0.304	0.016	4.48524e-37	12	Clspn
Hmgb3	1.60958e-41	0.626497	0.411	0.046	4.5049e-37	12	Hmgb3
Mis18bp1	3.73472e-41	0.414794	0.25	0.007	1.04527e-36	12	Mis18bp1
Rbm3.1	6.45838e-41	0.544308	0.964	0.913	1.80757e-36	12	Rbm3
Cep55	6.5839e-40	0.297642	0.214	0.003	1.8427e-35	12	Cep55
Sgol2a	6.73645e-40	0.310557	0.214	0.003	1.8854e-35	12	Sgol2a
Pbk	9.4027e-40	0.538901	0.226	0.005	2.63163e-35	12	Pbk
Ncapg	1.73256e-39	0.320815	0.214	0.003	4.84909e-35	12	Ncapg
Aurka	5.15477e-39	0.365428	0.232	0.006	1.44272e-34	12	Aurka
Txn1.1	5.47656e-39	0.633677	0.935	0.674	1.53278e-34	12	Txn1
Oaz1.1	6.42396e-39	0.531422	1	0.981	1.79794e-34	12	Oaz1
Anp32e	8.52227e-39	0.772892	0.619	0.154	2.38521e-34	12	Anp32e
Spag5	9.57922e-39	0.336982	0.214	0.004	2.68103e-34	12	Spag5
Arl6ip1.1	1.11471e-38	0.890908	0.81	0.51	3.11986e-34	12	Arl6ip1
Crip1.1	3.87486e-38	0.547297	0.946	0.949	1.0845e-33	12	Crip1
C330027C09Rik	5.64787e-38	0.305365	0.232	0.007	1.58073e-33	12	C330027C09Rik
Shcbp1	1.02591e-37	0.354719	0.256	0.011	2.87132e-33	12	Shcbp1
Hist1h4i	2.28018e-37	0.375824	0.333	0.04	6.38177e-33	12	Hist1h4i
Shisa5.2	2.96734e-37	-0.640631	0.863	0.963	8.305e-33	12	Shisa5
Kif20b	1.00253e-36	0.351043	0.274	0.021	2.80588e-32	12	Kif20b
Kif20a	1.1657e-36	0.303805	0.19	0.002	3.26255e-32	12	Kif20a
Rpl34	1.67907e-36	-0.32135	0.982	1	4.69939e-32	12	Rpl34
Ska2	2.25855e-36	0.423796	0.256	0.013	6.32124e-32	12	Ska2
Hist1h2bc	2.77903e-36	0.837157	0.298	0.022	7.77795e-32	12	Hist1h2bc
Ckap2	3.3189e-36	0.375408	0.214	0.005	9.28894e-32	12	Ckap2
Dbf4	5.6764e-36	0.46286	0.405	0.066	1.58871e-31	12	Dbf4
Anapc5.1	6.90296e-36	0.531974	0.708	0.246	1.932e-31	12	Anapc5
Hist1h2ak	1.20529e-35	0.336802	0.22	0.006	3.37336e-31	12	Hist1h2ak
Ncaph	2.48046e-35	0.362494	0.232	0.008	6.94232e-31	12	Ncaph
Foxm1	2.73975e-35	0.278694	0.196	0.004	7.66801e-31	12	Foxm1
Rpl17.1	2.89859e-35	-0.337683	0.97	0.999	8.11257e-31	12	Rpl17
Tyms.1	3.09768e-35	0.666994	0.405	0.057	8.66978e-31	12	Tyms
Cbx3.1	3.71193e-35	0.803207	0.839	0.4	1.0389e-30	12	Cbx3
Actg1.3	1.86342e-34	0.464861	0.958	0.989	5.21533e-30	12	Actg1
E2f2	2.27755e-34	0.569552	0.262	0.015	6.37441e-30	12	E2f2
1700097N02Rik	3.03028e-34	0.470775	0.345	0.043	8.48115e-30	12	1700097N02Rik
Cks1brt	5.68684e-34	0.294987	0.202	0.005	1.59163e-29	12	Cks1brt
Tcf19.1	5.75022e-34	0.600322	0.357	0.042	1.60937e-29	12	Tcf19
Smc1a.1	7.74895e-34	0.52459	0.601	0.181	2.16878e-29	12	Smc1a
Tuba1c	1.11231e-33	0.764656	0.512	0.113	3.11313e-29	12	Tuba1c
Hmgn5	2.28697e-33	0.313321	0.44	0.121	6.40078e-29	12	Hmgn5
Junb.4	3.0832e-33	-0.754231	0.881	0.958	8.62926e-29	12	Junb
Lgals1.5	5.13919e-33	0.662852	0.94	0.919	1.43836e-28	12	Lgals1
Btg1.4	5.27368e-33	-0.738329	0.869	0.918	1.476e-28	12	Btg1
Rpl18a	6.01993e-33	-0.274828	0.982	1	1.68486e-28	12	Rpl18a
Atpif1.1	6.12692e-33	1.14426	0.792	0.346	1.7148e-28	12	Atpif1
Fkbp2.1	9.37145e-33	0.57836	0.595	0.169	2.62288e-28	12	Fkbp2
Smc3.1	1.25373e-32	0.380896	0.583	0.2	3.50893e-28	12	Smc3
Hist1h1e	1.28687e-32	0.497036	0.327	0.038	3.6017e-28	12	Hist1h1e
Mns1	2.12401e-32	0.475016	0.238	0.012	5.94468e-28	12	Mns1
Rpl19	3.43712e-32	-0.273249	0.982	1	9.61981e-28	12	Rpl19
Fzr1	4.18675e-32	0.65441	0.363	0.051	1.17179e-27	12	Fzr1
Ccnf	4.51447e-32	0.334525	0.179	0.003	1.26351e-27	12	Ccnf
Dut.3	6.68753e-32	0.712719	0.619	0.187	1.87171e-27	12	Dut
Pih1d1	1.54634e-31	0.317199	0.47	0.143	4.32791e-27	12	Pih1d1
Commd1	2.23584e-31	0.413726	0.565	0.182	6.25767e-27	12	Commd1
Csrp1.1	3.13631e-31	0.485578	0.524	0.141	8.77791e-27	12	Csrp1
Rrm1.1	3.72572e-31	0.448383	0.321	0.038	1.04275e-26	12	Rrm1
Cbx5.1	4.04034e-31	0.418102	0.399	0.074	1.13081e-26	12	Cbx5
Rpl13	4.13061e-31	-0.269526	0.976	1	1.15607e-26	12	Rpl13
Kif2c	4.85935e-31	0.251286	0.149	0.001	1.36004e-26	12	Kif2c
Aspm	1.05715e-30	0.296699	0.143	0.001	2.95876e-26	12	Aspm
Ncapg2.1	2.46868e-30	0.318704	0.226	0.012	6.90935e-26	12	Ncapg2
Cenpp	2.74428e-30	0.317522	0.208	0.009	7.6807e-26	12	Cenpp
Rpl37	3.8027e-30	-0.306994	0.982	1	1.0643e-25	12	Rpl37
Cenpl	6.67874e-30	0.494928	0.274	0.025	1.86925e-25	12	Cenpl
Rnf26	9.0227e-30	0.440045	0.321	0.045	2.52527e-25	12	Rnf26
Emp3.2	9.21254e-30	0.644195	0.869	0.594	2.57841e-25	12	Emp3
E2f8	9.37965e-30	0.320693	0.185	0.005	2.62518e-25	12	E2f8
Trappc1	1.12044e-29	0.319006	0.571	0.22	3.13588e-25	12	Trappc1
Rpl9	1.15724e-29	-0.281481	0.958	1	3.23889e-25	12	Rpl9
Cldnd1	1.21403e-29	0.296818	0.393	0.104	3.39783e-25	12	Cldnd1
Rps18	1.4021e-29	-0.307639	0.97	1	3.9242e-25	12	Rps18
Cenph.1	1.43247e-29	0.323954	0.238	0.016	4.0092e-25	12	Cenph
Rpl30	1.50428e-29	-0.39228	0.958	0.998	4.21018e-25	12	Rpl30
Mcm5.1	1.62759e-29	0.450015	0.405	0.078	4.5553e-25	12	Mcm5
Ckap5	1.81709e-29	0.328981	0.244	0.023	5.08566e-25	12	Ckap5
Ssr1.1	1.94671e-29	0.324507	0.661	0.286	5.44845e-25	12	Ssr1
Fau	2.11969e-29	-0.281429	0.964	1	5.93259e-25	12	Fau
Lsm5.1	4.43851e-29	0.641232	0.821	0.435	1.24225e-24	12	Lsm5
Rpl27	7.1226e-29	-0.36875	0.946	0.997	1.99347e-24	12	Rpl27
Hdgf	7.34372e-29	0.424239	0.577	0.201	2.05536e-24	12	Hdgf
Tagln2.1	8.08171e-29	0.554108	0.881	0.712	2.26191e-24	12	Tagln2
Rad51ap1.1	1.63405e-28	0.302055	0.22	0.013	4.57337e-24	12	Rad51ap1
Cdc25b	1.85549e-28	0.721174	0.429	0.088	5.19316e-24	12	Cdc25b
Hist1h4d	3.02911e-28	0.347911	0.226	0.017	8.47788e-24	12	Hist1h4d
Ncapd3	3.72743e-28	0.3767	0.357	0.07	1.04323e-23	12	Ncapd3
Ccnd2.4	3.88941e-28	-0.789404	0.44	0.622	1.08857e-23	12	Ccnd2
Rabac1.3	4.94411e-28	-0.519364	0.577	0.599	1.38376e-23	12	Rabac1
Ncaph2	5.19934e-28	0.352949	0.482	0.151	1.45519e-23	12	Ncaph2
Ddx39	9.88542e-28	0.439857	0.565	0.19	2.76673e-23	12	Ddx39
Cdkn2c	1.59708e-27	0.490907	0.381	0.08	4.4699e-23	12	Cdkn2c
Med30.1	1.95482e-27	0.281232	0.583	0.249	5.47115e-23	12	Med30
Bcl2.3	1.97632e-27	-0.806555	0.435	0.681	5.53133e-23	12	Bcl2
Hint1.1	2.00686e-27	0.481846	0.958	0.798	5.61681e-23	12	Hint1
Rnaseh2b.1	2.90548e-27	0.372591	0.399	0.094	8.13187e-23	12	Rnaseh2b
Cbx1.1	4.57649e-27	0.318631	0.548	0.209	1.28087e-22	12	Cbx1
Hnrnpa3.1	5.11427e-27	0.583326	0.863	0.615	1.43138e-22	12	Hnrnpa3
Rps21.1	5.41025e-27	-0.368642	0.94	0.997	1.51422e-22	12	Rps21
Nxt1	7.44891e-27	0.322757	0.423	0.122	2.0848e-22	12	Nxt1
Trim59	2.05758e-26	0.369759	0.262	0.034	5.75874e-22	12	Trim59
Nono.1	2.15655e-26	0.388448	0.756	0.363	6.03576e-22	12	Nono
Manf.1	4.07862e-26	0.310526	0.679	0.327	1.14152e-21	12	Manf
Dnajc9.1	5.89469e-26	0.520598	0.595	0.207	1.64981e-21	12	Dnajc9
Rhno1	6.14826e-26	0.253905	0.25	0.038	1.72077e-21	12	Rhno1
Hcst.2	6.68947e-26	-0.59578	0.863	0.929	1.87225e-21	12	Hcst
Nudt21.1	9.80298e-26	0.54933	0.762	0.35	2.74366e-21	12	Nudt21
Gapdh.1	1.02306e-25	0.516401	0.929	0.779	2.86333e-21	12	Gapdh
Sdf2l1.2	1.11871e-25	0.275007	0.554	0.231	3.13106e-21	12	Sdf2l1
Rps15a	1.3095e-25	-0.265407	0.982	1	3.66503e-21	12	Rps15a
Taf12	1.74434e-25	0.280533	0.429	0.144	4.88206e-21	12	Taf12
Ube2t	2.05369e-25	0.273879	0.226	0.023	5.74787e-21	12	Ube2t
Kpna2	2.46098e-25	0.352195	0.214	0.017	6.8878e-21	12	Kpna2
Nde1	2.53702e-25	0.310375	0.357	0.092	7.10061e-21	12	Nde1
Haus4.1	2.57903e-25	0.433229	0.411	0.101	7.2182e-21	12	Haus4
Anapc15.1	3.6359e-25	0.298547	0.369	0.096	1.01761e-20	12	Anapc15
Rdm1	6.02339e-25	0.434988	0.333	0.062	1.68583e-20	12	Rdm1
Rangap1	9.68696e-25	0.449563	0.405	0.098	2.71119e-20	12	Rangap1
Ppih.1	1.20059e-24	0.27781	0.369	0.107	3.36021e-20	12	Ppih
Pcbd2.1	1.27122e-24	0.364152	0.577	0.231	3.55788e-20	12	Pcbd2
Il2rg.2	1.40609e-24	-0.367048	0.613	0.549	3.93538e-20	12	Il2rg
Ubl4a	1.80647e-24	0.408658	0.542	0.197	5.05595e-20	12	Ubl4a
Clic1.1	2.27707e-24	0.437724	0.935	0.865	6.37307e-20	12	Clic1
Rps13	2.33537e-24	-0.286189	0.964	1	6.53624e-20	12	Rps13
Lig1.1	2.7981e-24	0.49918	0.345	0.065	7.83132e-20	12	Lig1
Banf1.1	4.86472e-24	0.421831	0.685	0.302	1.36154e-19	12	Banf1
Aldoa.2	5.4498e-24	-0.581192	0.405	0.559	1.52529e-19	12	Aldoa
Plk4	6.65559e-24	0.303457	0.262	0.04	1.86277e-19	12	Plk4
Ltb.8	7.60627e-24	-0.869355	0.321	0.597	2.12884e-19	12	Ltb
Gm9843	8.52302e-24	-0.293994	0.964	0.999	2.38542e-19	12	Gm9843
Snrpd1.1	9.76475e-24	0.520555	0.744	0.345	2.73296e-19	12	Snrpd1
Dazap1.1	1.10634e-23	0.346506	0.643	0.286	3.09641e-19	12	Dazap1
Hspa8.3	1.27749e-23	0.437218	0.958	0.929	3.57544e-19	12	Hspa8
Itgb7.1	1.42876e-23	0.357267	0.708	0.342	3.9988e-19	12	Itgb7
Ewsr1	2.52464e-23	0.316728	0.732	0.379	7.06596e-19	12	Ewsr1
Tipin.1	2.82845e-23	0.47076	0.446	0.128	7.91625e-19	12	Tipin
Rps27a	2.86127e-23	-0.251555	0.964	1	8.00813e-19	12	Rps27a
Lsm3.1	3.57087e-23	0.379141	0.649	0.281	9.99415e-19	12	Lsm3
Cmtm7.3	3.78057e-23	0.606588	0.827	0.499	1.05811e-18	12	Cmtm7
Ube2n	4.36192e-23	0.276644	0.679	0.337	1.22081e-18	12	Ube2n
Cox5b.1	4.68193e-23	0.429584	0.94	0.787	1.31038e-18	12	Cox5b
Ap3s1.1	5.7701e-23	0.302763	0.56	0.254	1.61493e-18	12	Ap3s1
Ssr3	5.94351e-23	0.251335	0.458	0.184	1.66347e-18	12	Ssr3
Lsm2.1	6.01398e-23	0.397046	0.542	0.206	1.68319e-18	12	Lsm2
Arhgap19	8.54614e-23	0.278047	0.125	0.002	2.39189e-18	12	Arhgap19
Car2.3	8.86738e-23	1.41489	0.857	0.533	2.4818e-18	12	Car2
Rfc5.1	1.04724e-22	0.405847	0.345	0.076	2.93103e-18	12	Rfc5
Ppp2r4	1.16367e-22	0.269113	0.417	0.151	3.25688e-18	12	Ppp2r4
Odf2	1.19233e-22	0.251358	0.31	0.084	3.33708e-18	12	Odf2
Ptms	1.60657e-22	0.356722	0.405	0.125	4.49646e-18	12	Ptms
Ctla2a.2	1.72006e-22	-0.648234	0.673	0.802	4.8141e-18	12	Ctla2a
Rpl36-ps3.1	1.92708e-22	-0.37942	0.685	0.677	5.39352e-18	12	Rpl36-ps3
Mcm7.1	2.06254e-22	0.532849	0.351	0.073	5.77264e-18	12	Mcm7
Cdkn2d.2	2.17398e-22	0.628387	0.667	0.285	6.08454e-18	12	Cdkn2d
Ska3	2.47385e-22	0.256582	0.125	0.002	6.9238e-18	12	Ska3
Ssr2	2.60507e-22	0.253828	0.643	0.323	7.29106e-18	12	Ssr2
Setd8	2.83942e-22	0.307739	0.274	0.051	7.94697e-18	12	Setd8
Traf7	3.36932e-22	0.258164	0.268	0.073	9.43006e-18	12	Traf7
Reep4	3.68927e-22	0.402399	0.31	0.059	1.03255e-17	12	Reep4
Xpo1	3.75195e-22	0.311057	0.315	0.074	1.05009e-17	12	Xpo1
Stk17b.1	4.14134e-22	-0.251571	0.536	0.451	1.15908e-17	12	Stk17b
Hsp90b1	4.21103e-22	0.479636	0.756	0.372	1.17858e-17	12	Hsp90b1
Lbr	4.40404e-22	0.570889	0.625	0.254	1.2326e-17	12	Lbr
Hnrnpab.1	5.82879e-22	0.434185	0.661	0.295	1.63136e-17	12	Hnrnpab
Hist1h1c	6.37997e-22	0.53491	0.286	0.046	1.78562e-17	12	Hist1h1c
Calm2.1	1.09106e-21	0.498691	0.946	0.866	3.05367e-17	12	Calm2
Bbip1	1.43602e-21	0.2959	0.44	0.163	4.01913e-17	12	Bbip1
Whsc1	1.95706e-21	0.285333	0.315	0.078	5.47742e-17	12	Whsc1
Ap1m1	2.07904e-21	0.26626	0.375	0.127	5.81883e-17	12	Ap1m1
Vgll4.2	2.09871e-21	-0.417367	0.542	0.514	5.87387e-17	12	Vgll4
Psip1	2.36121e-21	0.254988	0.399	0.145	6.60856e-17	12	Psip1
Gm10260	2.93406e-21	-0.290205	0.452	0.42	8.21185e-17	12	Gm10260
Rpl11	3.20404e-21	-0.265074	0.97	0.999	8.96745e-17	12	Rpl11
Rps7.1	3.45575e-21	-0.251258	0.97	1	9.67196e-17	12	Rps7
Ap2m1	3.73607e-21	0.26993	0.637	0.32	1.04565e-16	12	Ap2m1
Txnl1.1	3.78592e-21	0.383635	0.589	0.264	1.0596e-16	12	Txnl1
Ppil1.1	6.0661e-21	0.307833	0.369	0.111	1.69778e-16	12	Ppil1
Serinc3.2	6.63433e-21	0.76625	0.881	0.639	1.85682e-16	12	Serinc3
Ngfrap1.1	8.78149e-21	0.420455	0.595	0.253	2.45776e-16	12	Ngfrap1
Tuba1a	1.05456e-20	0.381455	0.565	0.234	2.9515e-16	12	Tuba1a
Dap.1	1.32995e-20	0.627551	0.619	0.261	3.72225e-16	12	Dap
Uhrf1.1	1.51431e-20	0.286761	0.214	0.024	4.23824e-16	12	Uhrf1
Snrnp25	1.81973e-20	0.260203	0.387	0.138	5.09306e-16	12	Snrnp25
Pcmt1	2.09853e-20	0.317364	0.476	0.192	5.87337e-16	12	Pcmt1
Hprt.1	2.17218e-20	0.365438	0.637	0.301	6.07949e-16	12	Hprt
Hnrnpr	2.32387e-20	0.306053	0.482	0.216	6.50404e-16	12	Hnrnpr
Eif3l	2.35007e-20	0.280572	0.577	0.278	6.57737e-16	12	Eif3l
Eif1ad	2.36182e-20	0.27145	0.381	0.131	6.61027e-16	12	Eif1ad
Prim1.1	2.61435e-20	0.314555	0.244	0.036	7.31703e-16	12	Prim1
Actn4	2.63855e-20	0.350276	0.458	0.172	7.38476e-16	12	Actn4
Elof1	3.19387e-20	0.30456	0.506	0.213	8.93902e-16	12	Elof1
Fxn	3.77776e-20	0.251957	0.298	0.079	1.05732e-15	12	Fxn
Jak1.1	5.98861e-20	-0.404649	0.792	0.789	1.67609e-15	12	Jak1
Smdt1	6.13604e-20	0.415005	0.911	0.58	1.71736e-15	12	Smdt1
Srsf3.1	6.18212e-20	0.516028	0.863	0.586	1.73025e-15	12	Srsf3
Bub3.1	6.56755e-20	0.54679	0.613	0.26	1.83813e-15	12	Bub3
Hnrnpa2b1.2	7.93387e-20	0.515077	0.905	0.648	2.22053e-15	12	Hnrnpa2b1
Prdx6.1	1.08418e-19	-0.267609	0.5	0.43	3.03441e-15	12	Prdx6
Txk.4	1.6477e-19	-0.435472	0.679	0.652	4.61158e-15	12	Txk
Rpl13a-ps1	1.77779e-19	-0.365723	0.899	0.883	4.97569e-15	12	Rpl13a-ps1
Srsf1	1.81637e-19	0.296614	0.423	0.154	5.08366e-15	12	Srsf1
Il2rb.2	2.49729e-19	-0.398631	0.708	0.733	6.9894e-15	12	Il2rb
Rinl.1	2.63585e-19	-0.346426	0.476	0.474	7.37722e-15	12	Rinl
Vdac1.1	2.6399e-19	0.346187	0.524	0.219	7.38856e-15	12	Vdac1
Nap1l1.1	3.11581e-19	0.343967	0.655	0.329	8.72054e-15	12	Nap1l1
Tcp1.1	3.49492e-19	0.384845	0.655	0.32	9.78157e-15	12	Tcp1
Ncr1.2	3.54945e-19	-0.420344	0.696	0.706	9.93419e-15	12	Ncr1
Grcc10	3.76245e-19	-0.264048	0.494	0.446	1.05303e-14	12	Grcc10
Rps15.1	5.35984e-19	-0.262453	0.976	0.999	1.50011e-14	12	Rps15
Fech	6.14299e-19	1.57919	0.149	0.032	1.7193e-14	12	Fech
Ssna1	6.17508e-19	0.3061	0.542	0.247	1.72828e-14	12	Ssna1
Gem.5	7.39977e-19	-0.38083	0.476	0.437	2.07105e-14	12	Gem
Gdi2	9.50971e-19	0.349053	0.774	0.431	2.66158e-14	12	Gdi2
Alyref.1	1.24387e-18	0.255701	0.25	0.051	3.48136e-14	12	Alyref
Atad2.1	1.28353e-18	0.273055	0.268	0.061	3.59234e-14	12	Atad2
Trim28	1.53945e-18	0.272148	0.28	0.073	4.30862e-14	12	Trim28
Rcc1	1.58731e-18	0.328682	0.196	0.022	4.44257e-14	12	Rcc1
Cntrl	1.81163e-18	0.267313	0.387	0.143	5.07039e-14	12	Cntrl
Gimap4.1	1.88432e-18	-0.276879	0.845	0.791	5.27384e-14	12	Gimap4
Dbi.2	2.27219e-18	0.424032	0.75	0.4	6.3594e-14	12	Dbi
Gpx1.6	2.42373e-18	2.34162	0.417	0.338	6.78353e-14	12	Gpx1
Orc6.1	2.43535e-18	0.289968	0.268	0.058	6.81607e-14	12	Orc6
Eif4a2.1	3.25447e-18	-0.488577	0.393	0.489	9.1086e-14	12	Eif4a2
Ctcf	3.31525e-18	0.267249	0.44	0.187	9.27873e-14	12	Ctcf
Prdx4.1	4.09577e-18	0.281235	0.232	0.039	1.14632e-13	12	Prdx4
Nkg7.3	6.46814e-18	-0.325011	0.935	0.996	1.8103e-13	12	Nkg7
Bpgm	6.85169e-18	1.86057	0.232	0.043	1.91765e-13	12	Bpgm
Hnrnpu.2	6.86176e-18	0.326378	0.69	0.366	1.92047e-13	12	Hnrnpu
Ubb	6.93518e-18	0.608783	1	0.995	1.94102e-13	12	Ubb
Dock2	7.6344e-18	-0.421732	0.345	0.425	2.13672e-13	12	Dock2
Sepw1.1	9.48273e-18	-0.356363	0.738	0.742	2.65403e-13	12	Sepw1
Psmc3	9.69392e-18	0.258911	0.548	0.279	2.71313e-13	12	Psmc3
Smc6.1	9.74973e-18	0.393886	0.607	0.281	2.72876e-13	12	Smc6
Siva1.1	9.91142e-18	0.303155	0.405	0.152	2.77401e-13	12	Siva1
Snrpe.1	1.02355e-17	0.430319	0.869	0.69	2.86471e-13	12	Snrpe
Myef2	1.46692e-17	0.266504	0.22	0.046	4.10563e-13	12	Myef2
Socs3.1	1.46765e-17	-0.373626	0.357	0.377	4.10766e-13	12	Socs3
2700029M09Rik.1	1.95263e-17	0.319417	0.446	0.182	5.46502e-13	12	2700029M09Rik
Ppp1cc	2.32647e-17	0.304825	0.774	0.45	6.51133e-13	12	Ppp1cc
Xcl1.8	2.38253e-17	-0.663449	0.738	0.798	6.66822e-13	12	Xcl1
Ccr2.2	2.57616e-17	-0.362235	0.696	0.681	7.21015e-13	12	Ccr2
Hnrnpa1.3	3.04104e-17	0.390332	0.899	0.599	8.51125e-13	12	Hnrnpa1
Ssrp1.1	3.64452e-17	0.338126	0.601	0.292	1.02003e-12	12	Ssrp1
Itpkb	3.69802e-17	-0.250973	0.357	0.321	1.035e-12	12	Itpkb
Ywhae	3.69959e-17	0.375444	0.714	0.384	1.03544e-12	12	Ywhae
Rnaseh2c	3.94651e-17	0.316469	0.726	0.404	1.10455e-12	12	Rnaseh2c
Srsf7.1	4.09103e-17	0.339998	0.613	0.309	1.145e-12	12	Srsf7
Cox7a2.1	4.19224e-17	0.436425	0.94	0.772	1.17332e-12	12	Cox7a2
Raly.1	4.28028e-17	0.495239	0.81	0.502	1.19797e-12	12	Raly
Sf3b6	4.51013e-17	0.260841	0.804	0.501	1.2623e-12	12	Sf3b6
Bsg.1	5.02972e-17	0.732864	0.815	0.489	1.40772e-12	12	Bsg
Ppp1cb	5.23808e-17	0.978483	0.548	0.229	1.46603e-12	12	Ppp1cb
Ndufb8.1	7.2777e-17	0.344715	0.786	0.466	2.03688e-12	12	Ndufb8
Stra13.1	9.09686e-17	0.369312	0.69	0.361	2.54603e-12	12	Stra13
Hspe1.2	9.45269e-17	-0.320483	0.631	0.619	2.64562e-12	12	Hspe1
Cd27.1	9.69629e-17	-0.381058	0.524	0.538	2.7138e-12	12	Cd27
Hp1bp3	9.83591e-17	0.343132	0.452	0.183	2.75287e-12	12	Hp1bp3
Sap30	1.20185e-16	0.26199	0.226	0.047	3.36373e-12	12	Sap30
Ddx39b.1	1.21621e-16	0.316422	0.571	0.275	3.40393e-12	12	Ddx39b
Carhsp1	1.23251e-16	0.71372	0.321	0.084	3.44954e-12	12	Carhsp1
Gnb2	1.24062e-16	0.388064	0.935	0.663	3.47225e-12	12	Gnb2
Blvrb	1.25881e-16	1.30363	0.167	0.052	3.52316e-12	12	Blvrb
Mapre1	1.30394e-16	0.261916	0.613	0.324	3.64948e-12	12	Mapre1
Rpl27-ps3	1.66454e-16	-0.347125	0.935	0.972	4.65871e-12	12	Rpl27-ps3
Serpinb6b.5	1.6721e-16	0.499182	0.744	0.414	4.67986e-12	12	Serpinb6b
Sf3b5	1.90974e-16	0.283947	0.756	0.444	5.34497e-12	12	Sf3b5
Gm11273	2.1641e-16	0.284826	0.72	0.418	6.0569e-12	12	Gm11273
Plp2	2.24846e-16	0.362735	0.631	0.314	6.293e-12	12	Plp2
Snrpc	2.30863e-16	0.26749	0.655	0.364	6.46139e-12	12	Snrpc
Rps28.2	2.32548e-16	-0.255771	0.952	0.998	6.50855e-12	12	Rps28
Dck	2.35575e-16	0.330722	0.232	0.043	6.59326e-12	12	Dck
Hmbs	2.42297e-16	1.22949	0.226	0.069	6.78142e-12	12	Hmbs
Serpina3g.8	2.43756e-16	-0.617404	0.393	0.51	6.82224e-12	12	Serpina3g
Lsm6.1	3.15958e-16	0.282706	0.696	0.394	8.84305e-12	12	Lsm6
Rpl28.2	3.4539e-16	0.257404	0.97	0.987	9.66679e-12	12	Rpl28
Emd	3.57724e-16	0.326504	0.619	0.33	1.0012e-11	12	Emd
Evl.2	5.17733e-16	-0.328547	0.607	0.626	1.44903e-11	12	Evl
Cript	7.02622e-16	0.296835	0.643	0.352	1.9665e-11	12	Cript
Psmd1	8.03826e-16	0.278046	0.315	0.102	2.24975e-11	12	Psmd1
Tceb2.1	8.1156e-16	0.381818	0.935	0.799	2.2714e-11	12	Tceb2
Rpl9-ps6	9.46339e-16	-0.286488	0.952	0.991	2.64861e-11	12	Rpl9-ps6
PISD.3	1.00874e-15	-0.503025	0.256	0.32	2.82326e-11	12	PISD
Atp5j.1	1.06551e-15	0.350515	0.97	0.792	2.98216e-11	12	Atp5j
S100a4.4	1.21618e-15	0.268376	0.369	0.144	3.40386e-11	12	S100a4
Ywhah.2	1.69761e-15	0.480598	0.762	0.46	4.75127e-11	12	Ywhah
Satb1.1	1.89208e-15	-0.381213	0.304	0.335	5.29554e-11	12	Satb1
Hemgn	1.94106e-15	1.01072	0.125	0.012	5.43265e-11	12	Hemgn
Pnrc1.1	2.14428e-15	-0.266023	0.363	0.349	6.00141e-11	12	Pnrc1
Swi5	2.14529e-15	0.327503	0.798	0.491	6.00424e-11	12	Swi5
Il10rb.1	2.22856e-15	-0.448666	0.28	0.383	6.23728e-11	12	Il10rb
Ap2s1	2.74853e-15	0.276263	0.726	0.431	7.69258e-11	12	Ap2s1
Pbxip1.2	3.01516e-15	-0.358065	0.214	0.273	8.43882e-11	12	Pbxip1
Nrgn.3	3.06967e-15	0.426219	0.5	0.215	8.59139e-11	12	Nrgn
Slbp.2	3.39061e-15	0.443176	0.595	0.288	9.48965e-11	12	Slbp
Rps18-ps3	3.60495e-15	-0.335295	0.94	0.984	1.00895e-10	12	Rps18-ps3
Azin1	3.74342e-15	0.440264	0.298	0.089	1.04771e-10	12	Azin1
Prelid1	4.46264e-15	0.441876	0.804	0.521	1.249e-10	12	Prelid1
Ifngr1.7	6.60334e-15	-0.453842	0.595	0.623	1.84814e-10	12	Ifngr1
Ctla2b.2	6.78847e-15	-0.438398	0.321	0.411	1.89996e-10	12	Ctla2b
Pcna.1	6.93834e-15	0.494537	0.482	0.197	1.9419e-10	12	Pcna
Traf1.2	7.02652e-15	-0.306873	0.411	0.392	1.96658e-10	12	Traf1
Hn1	7.47208e-15	0.488618	0.845	0.685	2.09129e-10	12	Hn1
Gm8186.1	8.68209e-15	0.33627	0.851	0.555	2.42994e-10	12	Gm8186
Vwa1.1	9.15623e-15	-0.26439	0.167	0.181	2.56265e-10	12	Vwa1
Snx3	1.05705e-14	0.253962	0.708	0.428	2.95847e-10	12	Snx3
Dctpp1.1	1.11411e-14	0.356358	0.369	0.131	3.11816e-10	12	Dctpp1
Brd8	1.15477e-14	0.286785	0.292	0.091	3.23197e-10	12	Brd8
Psmb9.2	1.30282e-14	0.3301	0.804	0.501	3.64633e-10	12	Psmb9
Mrpl18.1	1.31007e-14	0.412099	0.685	0.372	3.66661e-10	12	Mrpl18
Mzt1	1.69059e-14	0.353443	0.286	0.086	4.73162e-10	12	Mzt1
Srrt	1.89797e-14	0.291431	0.327	0.118	5.31205e-10	12	Srrt
Ier2.4	2.44033e-14	-0.365843	0.619	0.626	6.82998e-10	12	Ier2
Gpsm2	2.63968e-14	0.288028	0.101	0.005	7.38793e-10	12	Gpsm2
Fcer1g.3	2.82293e-14	-0.35733	0.935	0.985	7.9008e-10	12	Fcer1g
Ptprc.2	2.84872e-14	-0.440342	0.81	0.882	7.973e-10	12	Ptprc
Vbp1	2.91369e-14	0.303823	0.411	0.187	8.15484e-10	12	Vbp1
Qars	4.22812e-14	0.276596	0.399	0.193	1.18337e-09	12	Qars
Use1.1	4.38806e-14	-0.308926	0.595	0.581	1.22813e-09	12	Use1
Rpl13-ps3	4.55721e-14	-0.2881	0.94	0.991	1.27547e-09	12	Rpl13-ps3
Prdx1.1	6.16324e-14	0.295005	0.792	0.5	1.72497e-09	12	Prdx1
Agfg2	7.99818e-14	0.313386	0.214	0.049	2.23853e-09	12	Agfg2
Vasp.1	8.37512e-14	-0.369368	0.673	0.693	2.34403e-09	12	Vasp
Tmed2.1	1.02302e-13	0.284264	0.768	0.491	2.86323e-09	12	Tmed2
Cst7.3	1.24722e-13	-0.329735	0.423	0.446	3.49071e-09	12	Cst7
Impdh2.1	1.30971e-13	0.296949	0.56	0.292	3.66561e-09	12	Impdh2
Inpp5d	1.73929e-13	-0.25566	0.208	0.218	4.86793e-09	12	Inpp5d
Atp5b.1	1.79627e-13	0.422987	0.923	0.713	5.02741e-09	12	Atp5b
Cd52	1.81482e-13	-0.273858	0.94	0.996	5.07932e-09	12	Cd52
Mrpl51	2.70679e-13	0.321858	0.518	0.253	7.57576e-09	12	Mrpl51
Gm6133	2.86182e-13	-0.250546	0.893	0.857	8.00967e-09	12	Gm6133
Cdk4.1	3.16725e-13	0.306635	0.595	0.325	8.86449e-09	12	Cdk4
Prdx2.3	4.31144e-13	1.61741	0.601	0.334	1.20669e-08	12	Prdx2
Slfn2.2	6.75973e-13	-0.322156	0.351	0.367	1.89191e-08	12	Slfn2
Irf8.7	7.52075e-13	-0.412552	0.5	0.488	2.10491e-08	12	Irf8
H2-Ke6	8.20435e-13	-0.250786	0.238	0.258	2.29623e-08	12	H2-Ke6
Gimap3.3	1.0727e-12	-0.374345	0.435	0.497	3.00227e-08	12	Gimap3
Nabp1.3	1.33705e-12	-0.298634	0.25	0.272	3.74213e-08	12	Nabp1
Psmb6	1.39735e-12	0.258931	0.738	0.472	3.91092e-08	12	Psmb6
Fam103a1.2	1.5448e-12	0.282768	0.571	0.332	4.32358e-08	12	Fam103a1
Ahnak.1	1.63619e-12	-0.27773	0.607	0.578	4.57938e-08	12	Ahnak
Yipf4	1.69933e-12	0.844667	0.458	0.199	4.75608e-08	12	Yipf4
Fundc2	2.29784e-12	0.270119	0.673	0.4	6.43119e-08	12	Fundc2
Gnai2	2.36384e-12	0.331455	0.946	0.785	6.61592e-08	12	Gnai2
Cd160.2	2.78017e-12	-0.363244	0.274	0.321	7.78113e-08	12	Cd160
Mthfd2	4.25781e-12	0.290621	0.19	0.041	1.19167e-07	12	Mthfd2
Mpc2	6.27493e-12	0.27007	0.506	0.323	1.75623e-07	12	Mpc2
Ier5.1	6.88565e-12	-0.317014	0.232	0.269	1.92716e-07	12	Ier5
Rad23a	7.08633e-12	0.627386	0.435	0.189	1.98332e-07	12	Rad23a
Gimap6.2	7.87453e-12	-0.311541	0.756	0.776	2.20392e-07	12	Gimap6
Tmem256.1	8.29197e-12	0.292617	0.679	0.425	2.32076e-07	12	Tmem256
S100a10.1	8.88666e-12	0.282379	0.935	0.947	2.4872e-07	12	S100a10
Hmgn1.2	8.91498e-12	0.391633	0.536	0.275	2.49512e-07	12	Hmgn1
Tnfrsf18.1	9.30474e-12	-0.308348	0.381	0.414	2.60421e-07	12	Tnfrsf18
Rbbp4.2	1.09982e-11	0.384627	0.595	0.328	3.07818e-07	12	Rbbp4
Chac2	1.1477e-11	0.514817	0.113	0.013	3.21219e-07	12	Chac2
Tmem14c	1.26058e-11	0.427766	0.577	0.332	3.52812e-07	12	Tmem14c
Bhlhe40.4	1.43102e-11	-0.366863	0.429	0.468	4.00513e-07	12	Bhlhe40
Pcbp2.1	1.58885e-11	0.30885	0.875	0.635	4.44688e-07	12	Pcbp2
Tecpr1.2	1.61969e-11	-0.257387	0.357	0.368	4.53319e-07	12	Tecpr1
Zfand6	1.67327e-11	0.433521	0.542	0.33	4.68314e-07	12	Zfand6
Ppp1r16b	1.71536e-11	-0.297917	0.214	0.253	4.80094e-07	12	Ppp1r16b
Alkbh1	1.95232e-11	-0.272565	0.167	0.196	5.46414e-07	12	Alkbh1
Ndufb9	1.99897e-11	0.291322	0.792	0.533	5.59471e-07	12	Ndufb9
Tubg1	2.1935e-11	0.294257	0.196	0.047	6.13916e-07	12	Tubg1
Reep5.1	2.4184e-11	0.259346	0.923	0.702	6.76861e-07	12	Reep5
Rhoa	2.49126e-11	0.315633	0.899	0.672	6.97253e-07	12	Rhoa
Ranbp1.4	2.6739e-11	0.370702	0.732	0.461	7.48372e-07	12	Ranbp1
Stat4.1	2.70625e-11	-0.26016	0.244	0.264	7.57426e-07	12	Stat4
Ptpn18.1	2.90538e-11	-0.293659	0.923	0.963	8.13159e-07	12	Ptpn18
Fyn.1	3.43735e-11	-0.250292	0.375	0.375	9.62046e-07	12	Fyn
Klrb1a.2	3.47723e-11	-0.32155	0.405	0.435	9.73206e-07	12	Klrb1a
Fyb.1	3.51411e-11	-0.370953	0.333	0.407	9.83529e-07	12	Fyb
Atp5f1	3.71737e-11	0.318443	0.893	0.662	1.04042e-06	12	Atp5f1
Rpl5	4.10566e-11	-0.279967	0.94	0.987	1.14909e-06	12	Rpl5
Lsm4.1	6.09785e-11	0.313697	0.845	0.603	1.70667e-06	12	Lsm4
Mpst	6.6889e-11	0.251915	0.327	0.144	1.87209e-06	12	Mpst
Lgals3.1	6.7612e-11	0.419934	0.387	0.161	1.89232e-06	12	Lgals3
Snrpg.1	7.261e-11	0.299559	0.911	0.818	2.03221e-06	12	Snrpg
Pycard.2	8.08956e-11	0.359153	0.881	0.668	2.26411e-06	12	Pycard
Ppp1ca.1	8.52786e-11	0.307207	0.935	0.823	2.38678e-06	12	Ppp1ca
Mgst3	1.14711e-10	0.743347	0.101	0.02	3.21053e-06	12	Mgst3
Hnrnpk	1.44722e-10	0.267145	0.845	0.605	4.05048e-06	12	Hnrnpk
Fen1.1	1.9131e-10	0.303513	0.214	0.062	5.35437e-06	12	Fen1
AI662270.1	1.98237e-10	0.374261	0.554	0.303	5.54826e-06	12	AI662270
Psmb2	2.10563e-10	0.254659	0.696	0.449	5.89324e-06	12	Psmb2
Ube2b.1	2.13242e-10	0.557342	0.696	0.443	5.96821e-06	12	Ube2b
Gch1	2.28974e-10	0.653172	0.107	0.036	6.40853e-06	12	Gch1
Rfk	2.4837e-10	0.286239	0.22	0.085	6.95138e-06	12	Rfk
Cd72.1	2.66637e-10	-0.251453	0.262	0.286	7.46264e-06	12	Cd72
Zfp36l1.1	3.65618e-10	-0.357661	0.256	0.329	1.02329e-05	12	Zfp36l1
Atp5o.1	3.85616e-10	0.314473	0.827	0.595	1.07926e-05	12	Atp5o
Fam189b	4.10132e-10	-0.250685	0.321	0.343	1.14788e-05	12	Fam189b
Hvcn1.1	4.16789e-10	-0.250805	0.113	0.168	1.16651e-05	12	Hvcn1
Gm10263	5.45998e-10	-0.272089	0.833	0.833	1.52814e-05	12	Gm10263
Zbtb20.2	6.25927e-10	-0.357441	0.268	0.319	1.75184e-05	12	Zbtb20
Gm10036	6.30098e-10	-0.289683	0.929	0.966	1.76352e-05	12	Gm10036
Mbnl1.1	6.9554e-10	-0.290466	0.821	0.817	1.94668e-05	12	Mbnl1
Amd1	9.19926e-10	-0.277123	0.262	0.278	2.57469e-05	12	Amd1
Ctss.1	1.23181e-09	-0.262661	0.143	0.197	3.44758e-05	12	Ctss
Rps27l.1	1.79558e-09	0.259592	0.821	0.59	5.02546e-05	12	Rps27l
Gm9493	1.86666e-09	-0.276956	0.94	0.98	5.22441e-05	12	Gm9493
Cenpk	1.93279e-09	0.318713	0.107	0.014	5.4095e-05	12	Cenpk
Pdcd4.3	1.98857e-09	-0.360102	0.607	0.644	5.56561e-05	12	Pdcd4
Bst2.3	2.14947e-09	-0.264088	0.19	0.203	6.01594e-05	12	Bst2
Tfdp2	2.17873e-09	0.742792	0.113	0.045	6.09782e-05	12	Tfdp2
Gpr65.2	2.2157e-09	-0.299028	0.125	0.18	6.20131e-05	12	Gpr65
Sec61g	2.57199e-09	0.82823	0.917	0.787	7.19849e-05	12	Sec61g
Minos1.1	2.7487e-09	0.263034	0.857	0.637	7.69306e-05	12	Minos1
Rgs2.3	2.91767e-09	-0.284212	0.476	0.473	8.16599e-05	12	Rgs2
Bola3	3.07061e-09	0.475581	0.542	0.33	8.59403e-05	12	Bola3
Rgs1.3	3.23983e-09	-0.394905	0.262	0.304	9.06764e-05	12	Rgs1
Lamb3.2	3.47309e-09	-0.300384	0.179	0.225	9.72048e-05	12	Lamb3
Ghitm	3.51433e-09	0.665875	0.47	0.246	9.83592e-05	12	Ghitm
Metap2	3.79706e-09	0.52356	0.577	0.337	0.000106272	12	Metap2
Fasl.2	4.42691e-09	-0.358303	0.095	0.185	0.0001239	12	Fasl
Ndufa4.1	5.54059e-09	0.276943	0.929	0.784	0.00015507	12	Ndufa4
Ftl1	6.20712e-09	0.577637	1	0.975	0.000173725	12	Ftl1
Hsp90aa1.1	6.24046e-09	0.279076	0.756	0.523	0.000174658	12	Hsp90aa1
Ctsb.1	6.33163e-09	0.576953	0.381	0.175	0.00017721	12	Ctsb
Rnf10	6.79632e-09	0.55138	0.345	0.162	0.000190215	12	Rnf10
Limd2	6.90537e-09	-0.268881	0.887	0.886	0.000193267	12	Limd2
Cox6a1	6.92296e-09	0.283912	0.935	0.775	0.00019376	12	Cox6a1
Kctd20	7.2909e-09	0.322888	0.19	0.058	0.000204058	12	Kctd20
Pla2g16.2	7.44956e-09	0.32927	0.714	0.511	0.000208498	12	Pla2g16
Ndufb11	7.83475e-09	0.268017	0.881	0.678	0.000219279	12	Ndufb11
Tmx1	7.88274e-09	0.296506	0.286	0.124	0.000220622	12	Tmx1
Acp1	8.2756e-09	0.294143	0.387	0.214	0.000231617	12	Acp1
Cir1.1	8.40578e-09	0.420473	0.339	0.165	0.000235261	12	Cir1
Gm10116	8.55898e-09	0.370595	0.565	0.341	0.000239549	12	Gm10116
Atp5c1	8.91948e-09	0.270196	0.881	0.68	0.000249639	12	Atp5c1
Pfdn5.1	1.0957e-08	-0.257427	0.94	0.943	0.000306663	12	Pfdn5
Taldo1	1.15598e-08	0.260802	0.631	0.435	0.000323537	12	Taldo1
Ubald2.1	1.91998e-08	0.261302	0.851	0.649	0.000537363	12	Ubald2
Erh.1	2.25426e-08	0.306271	0.78	0.558	0.000630923	12	Erh
Xist.1	2.62125e-08	0.328671	0.935	0.87	0.000733634	12	Xist
Arf5	5.99869e-08	0.405975	0.845	0.645	0.00167891	12	Arf5
Hagh	8.02284e-08	0.707724	0.161	0.079	0.00224543	12	Hagh
Adipor1	8.96472e-08	0.452876	0.518	0.346	0.00250905	12	Adipor1
Ucp2	1.56867e-07	0.499324	0.696	0.483	0.00439039	12	Ucp2
Vps37b.6	1.7847e-07	-0.289019	0.554	0.545	0.00499501	12	Vps37b
Slc25a5.2	1.81819e-07	0.26334	0.923	0.801	0.00508874	12	Slc25a5
Ly6e.5	1.96247e-07	0.276457	0.911	0.785	0.00549256	12	Ly6e
2019-03-05	3.05539e-07	0.368523	0.262	0.111	0.00855142	12	2019-03-05
Fam220a	3.41908e-07	1.00936	0.196	0.115	0.00956932	12	Fam220a
Nr4a2.2	4.79147e-07	-0.296316	0.321	0.372	0.0134104	12	Nr4a2
Klra9.4	4.82528e-07	-0.27728	0.357	0.329	0.013505	12	Klra9
mt-Nd2.1	5.47459e-07	-0.277776	0.845	0.864	0.0153223	12	mt-Nd2
Ms4a4b.2	5.47694e-07	-0.300586	0.839	0.887	0.0153289	12	Ms4a4b
Gabarapl2.2	6.95895e-07	0.432877	0.72	0.533	0.0194767	12	Gabarapl2
Map1lc3b.1	7.93312e-07	0.53404	0.786	0.589	0.0222032	12	Map1lc3b
Riok3	8.46402e-07	0.366654	0.262	0.117	0.0236891	12	Riok3
Pim2.5	1.09056e-06	-0.268757	0.232	0.274	0.0305227	12	Pim2
Pnpo	1.27755e-06	0.595817	0.119	0.053	0.0357561	12	Pnpo
