# Supplementary figures and images for: Single-cell transcriptome reveals the novel role of T-bet in suppressing the immature NK gene signature
Source: eLife journal article supplement (doi:10.7554/elife.51339), 2020-05-14

A

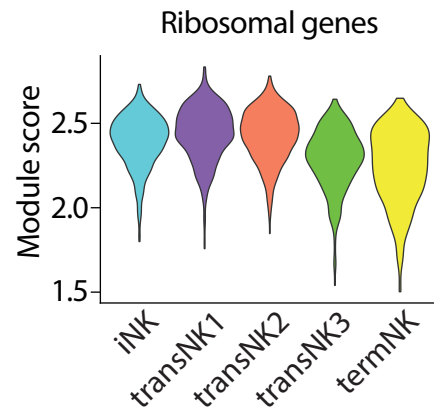

B

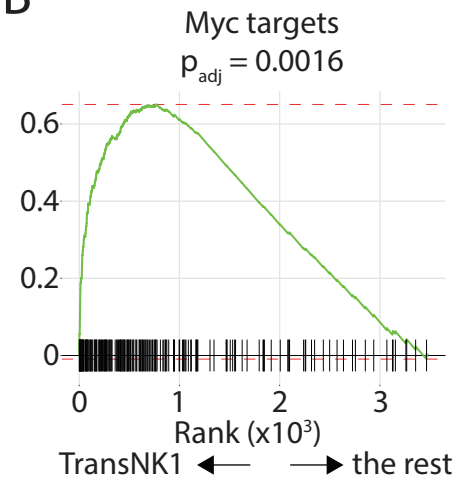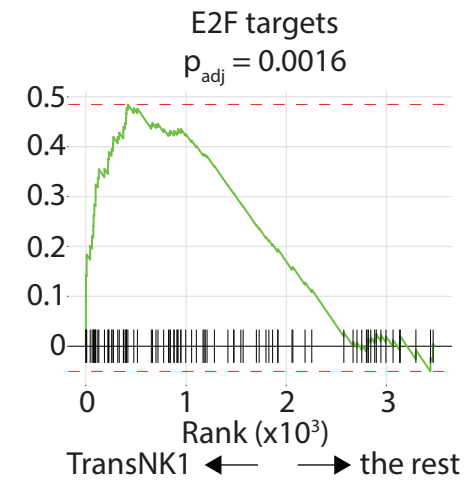

C

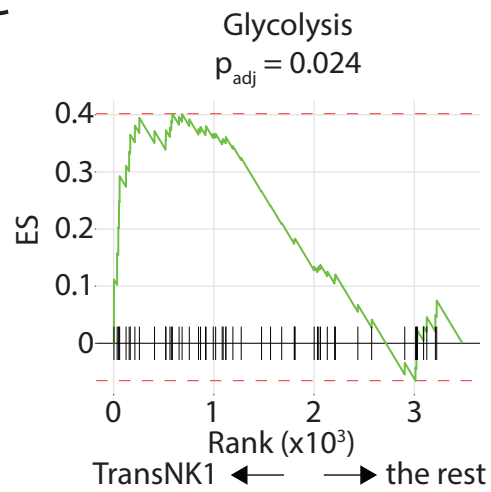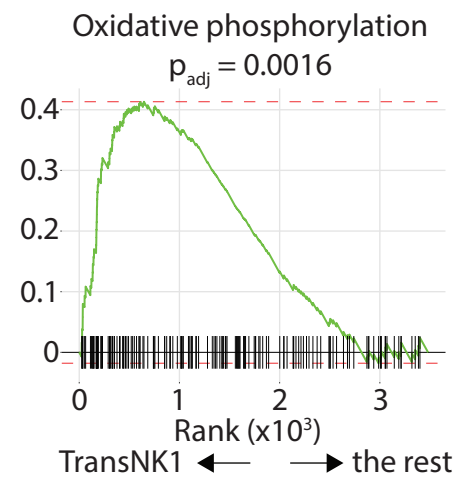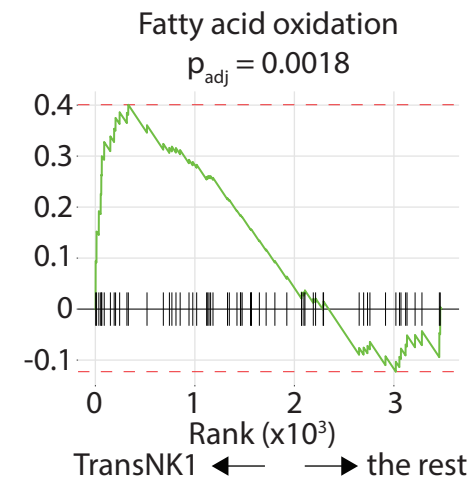

Supplement: supp [file elife-51339-supp-v1.zip]

A

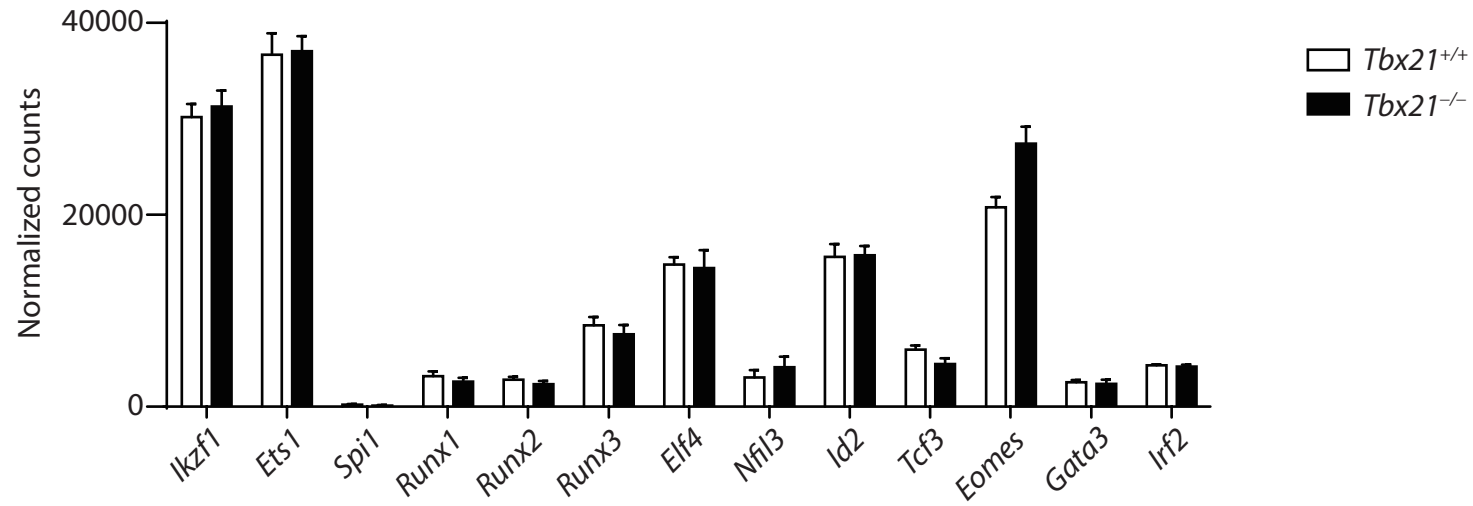

B

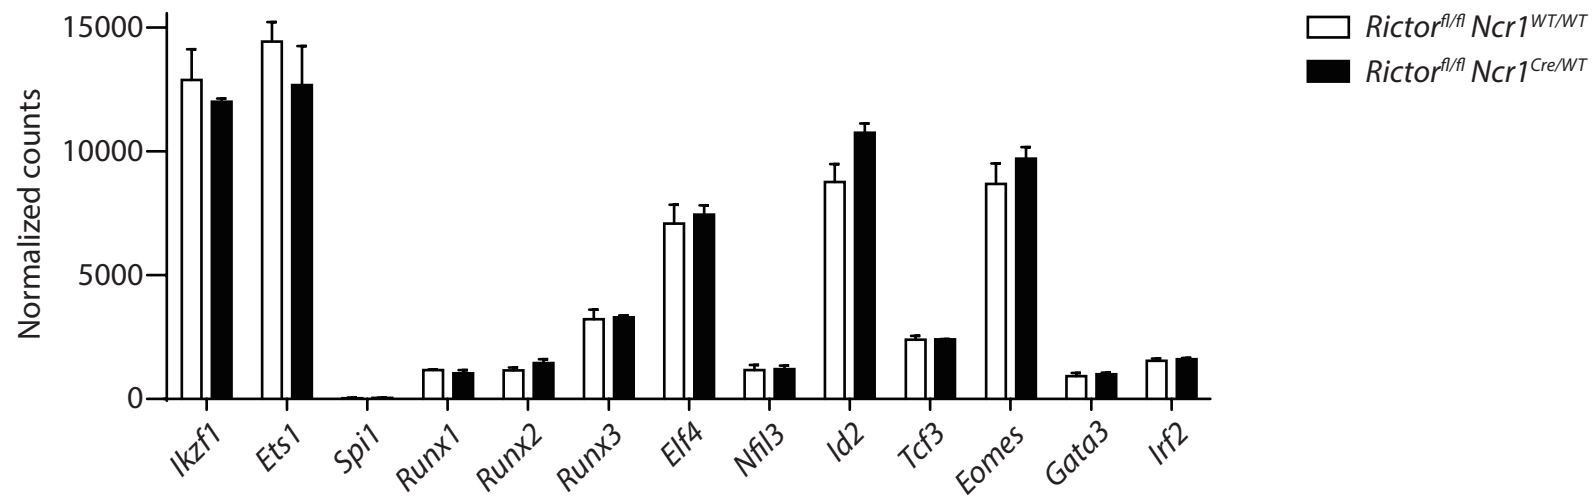

Supplement: supp [file elife-51339-supp-v1.zip]

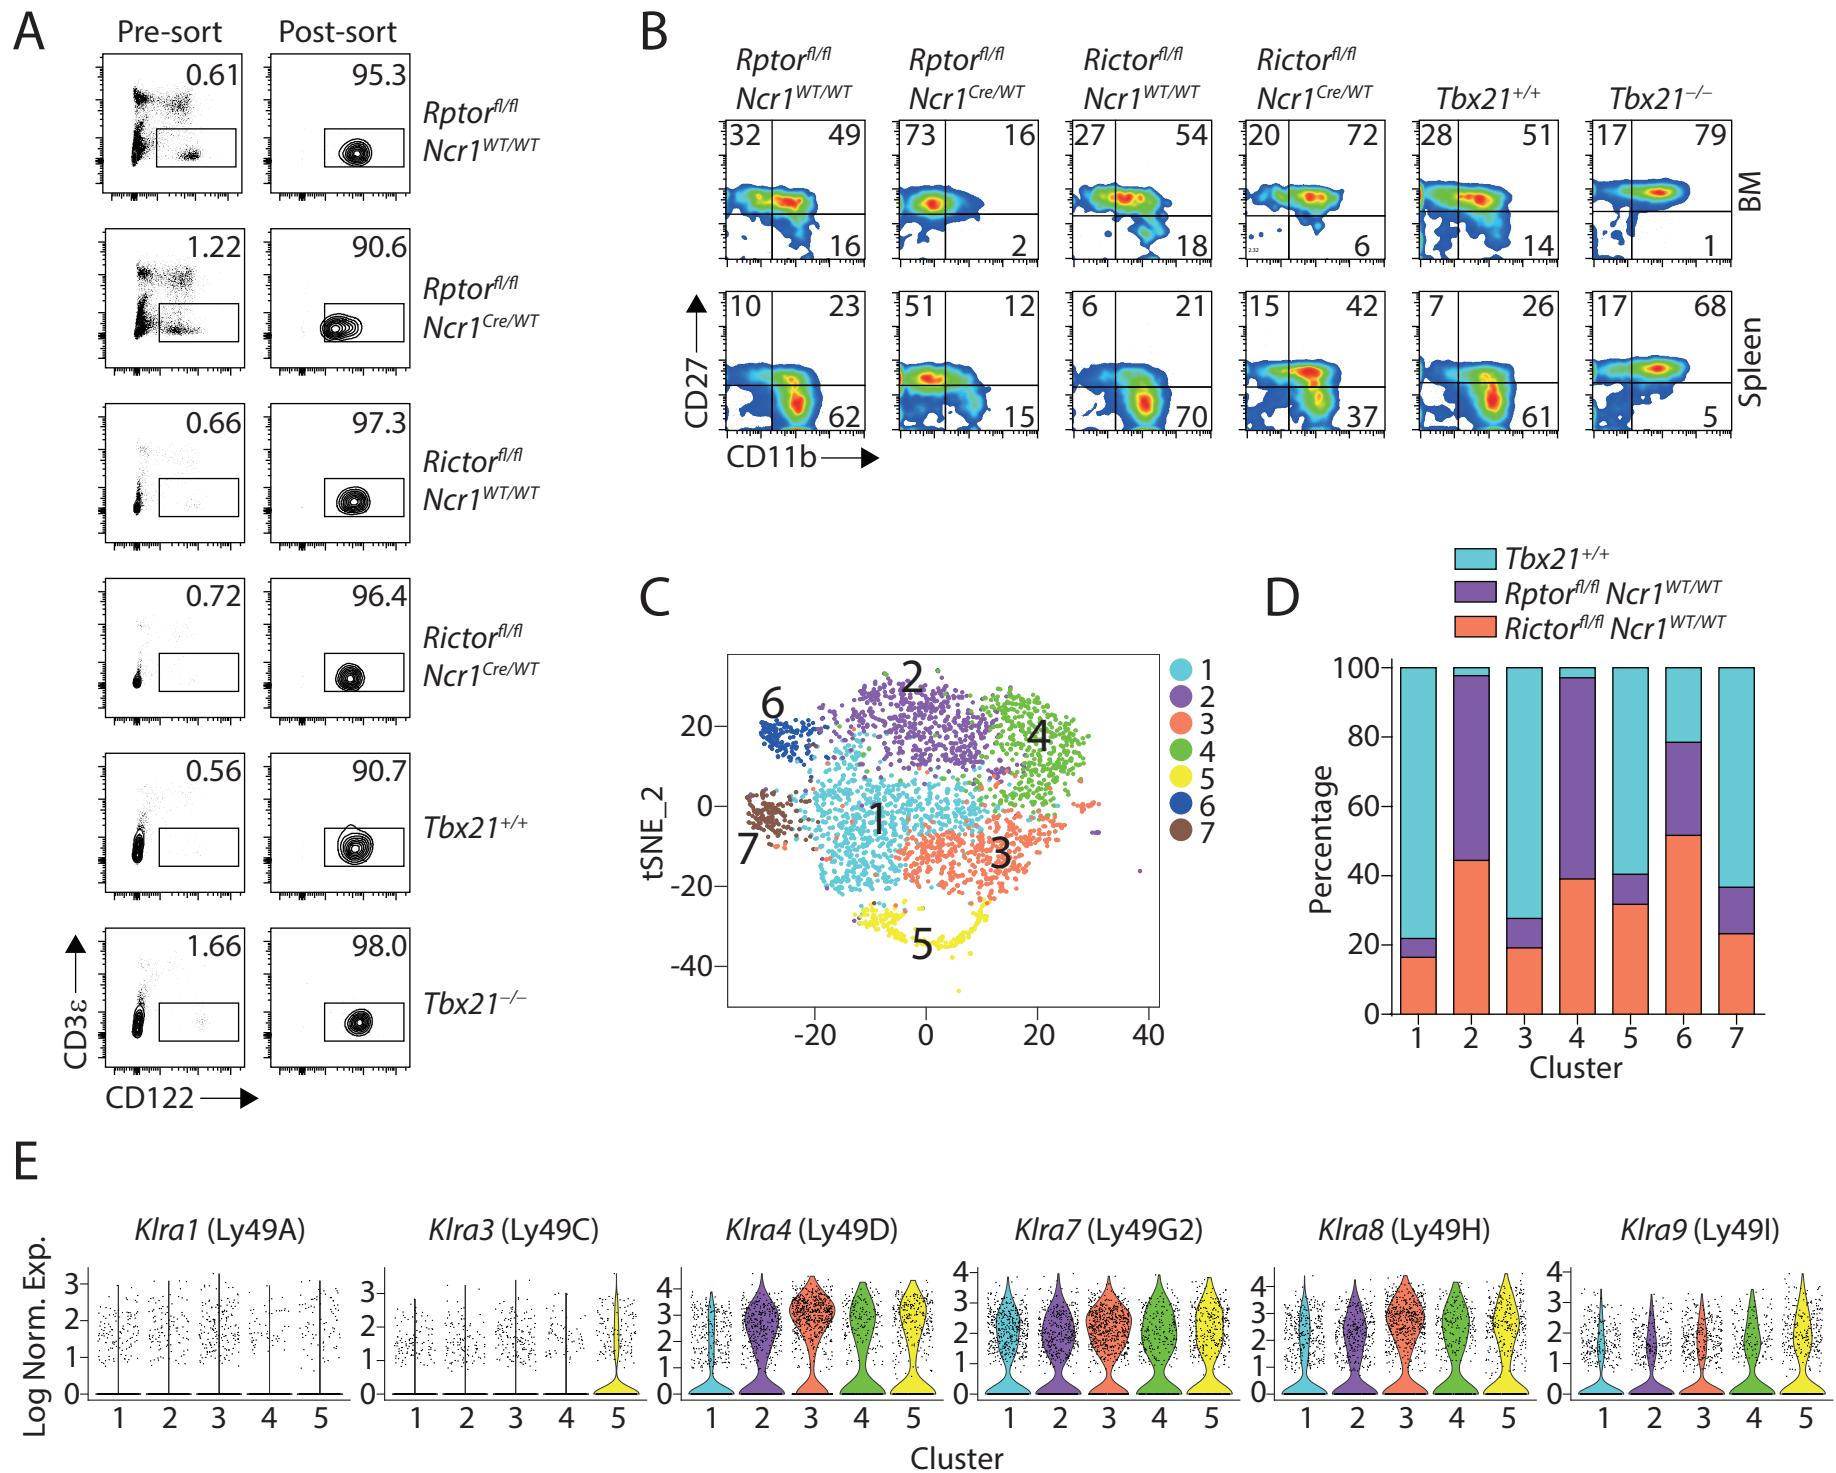

Supplement: supp [file elife-51339-supp-v1.zip]

A

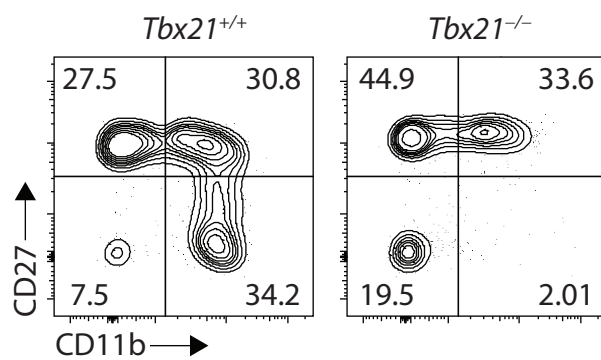

B

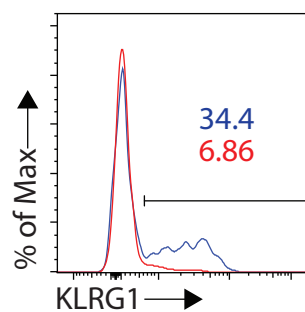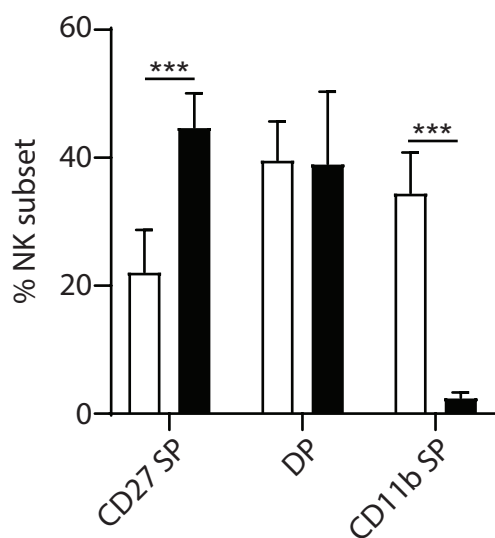

□ *Tbx21*<sup>+/+</sup>  
 ■ *Tbx21*<sup>-/-</sup>

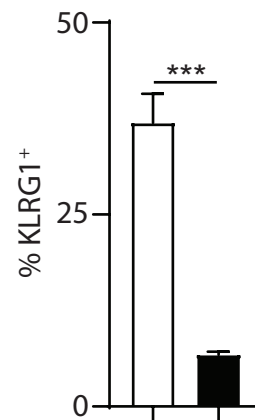

C

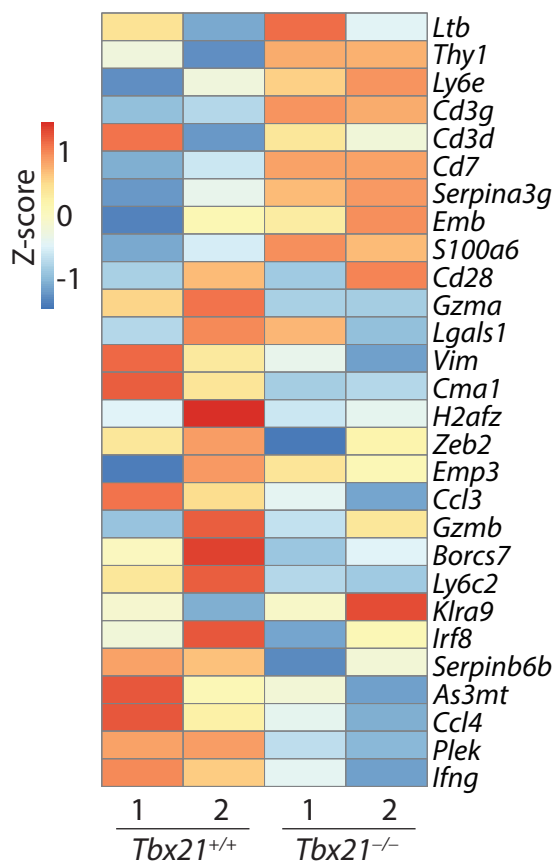

D

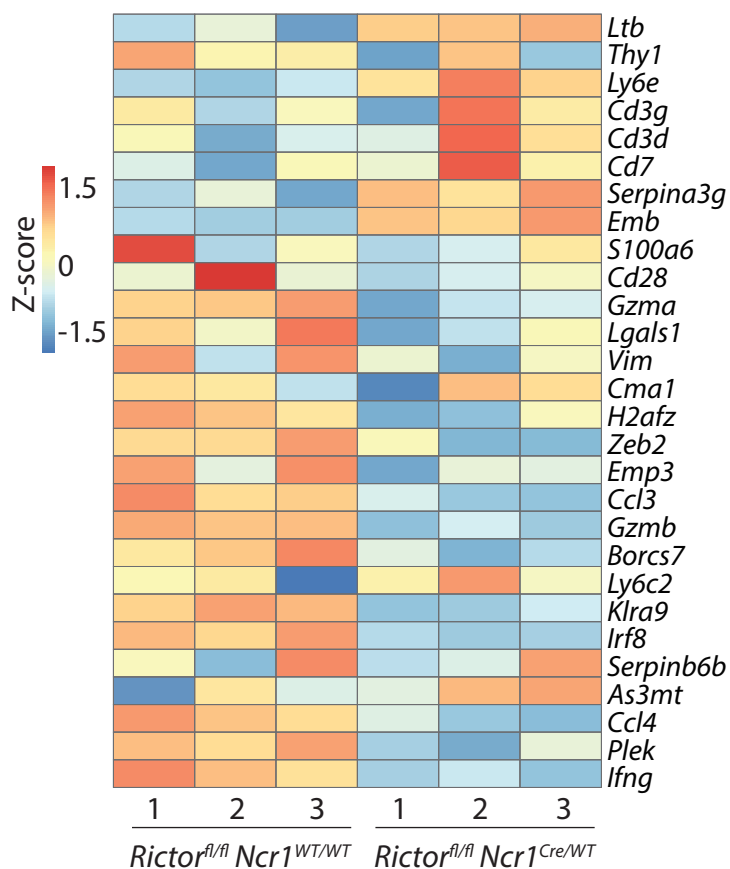

Supplement: supp [file elife-51339-supp-v1.zip]

A

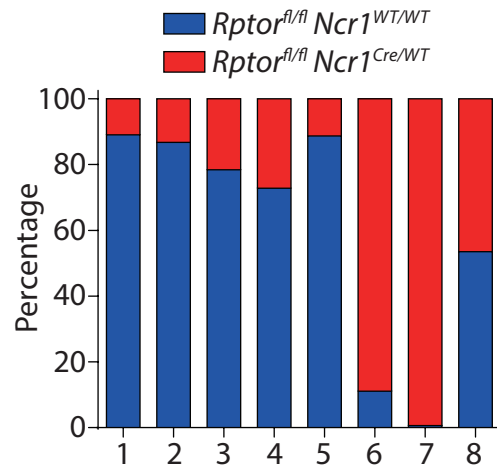

B

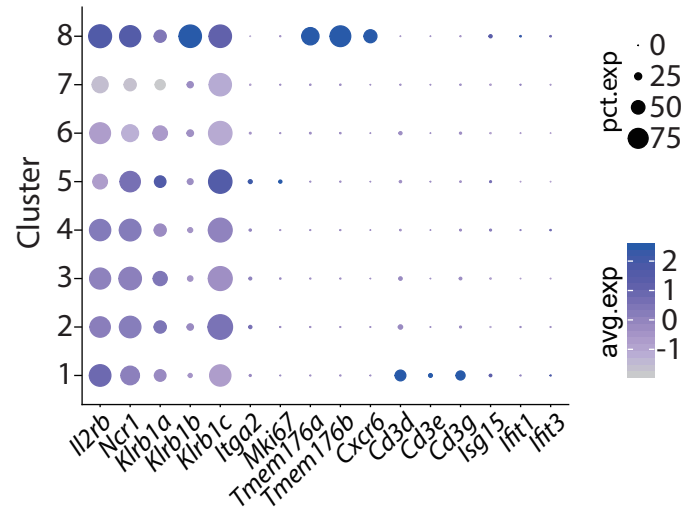

C

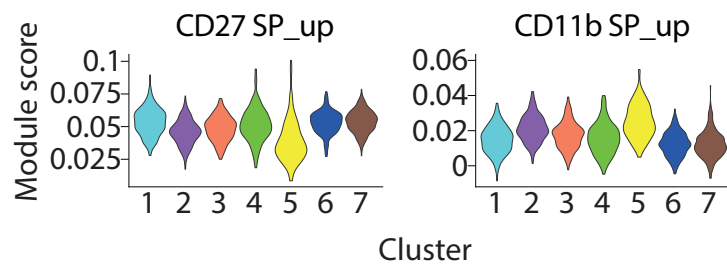

D

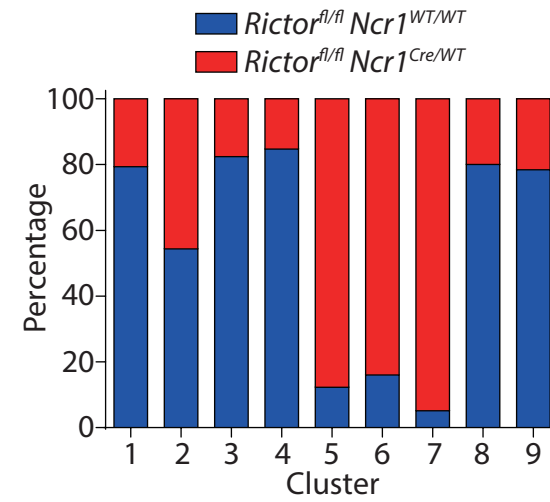

E

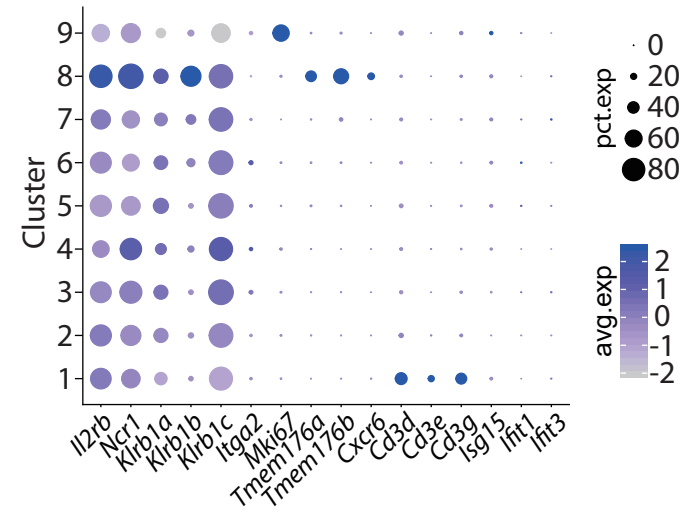

F

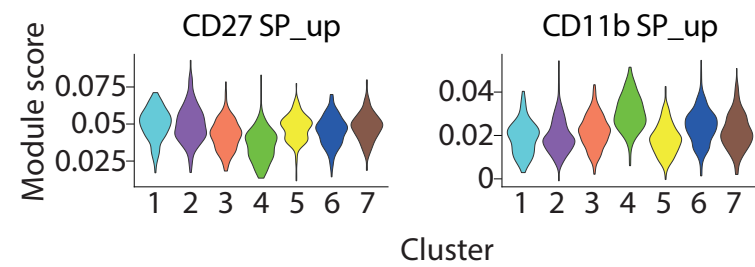

Supplement: supp [file elife-51339-supp-v1.zip › elife_poa_e51339_Figure_3_figure_supplement_1.pdf]

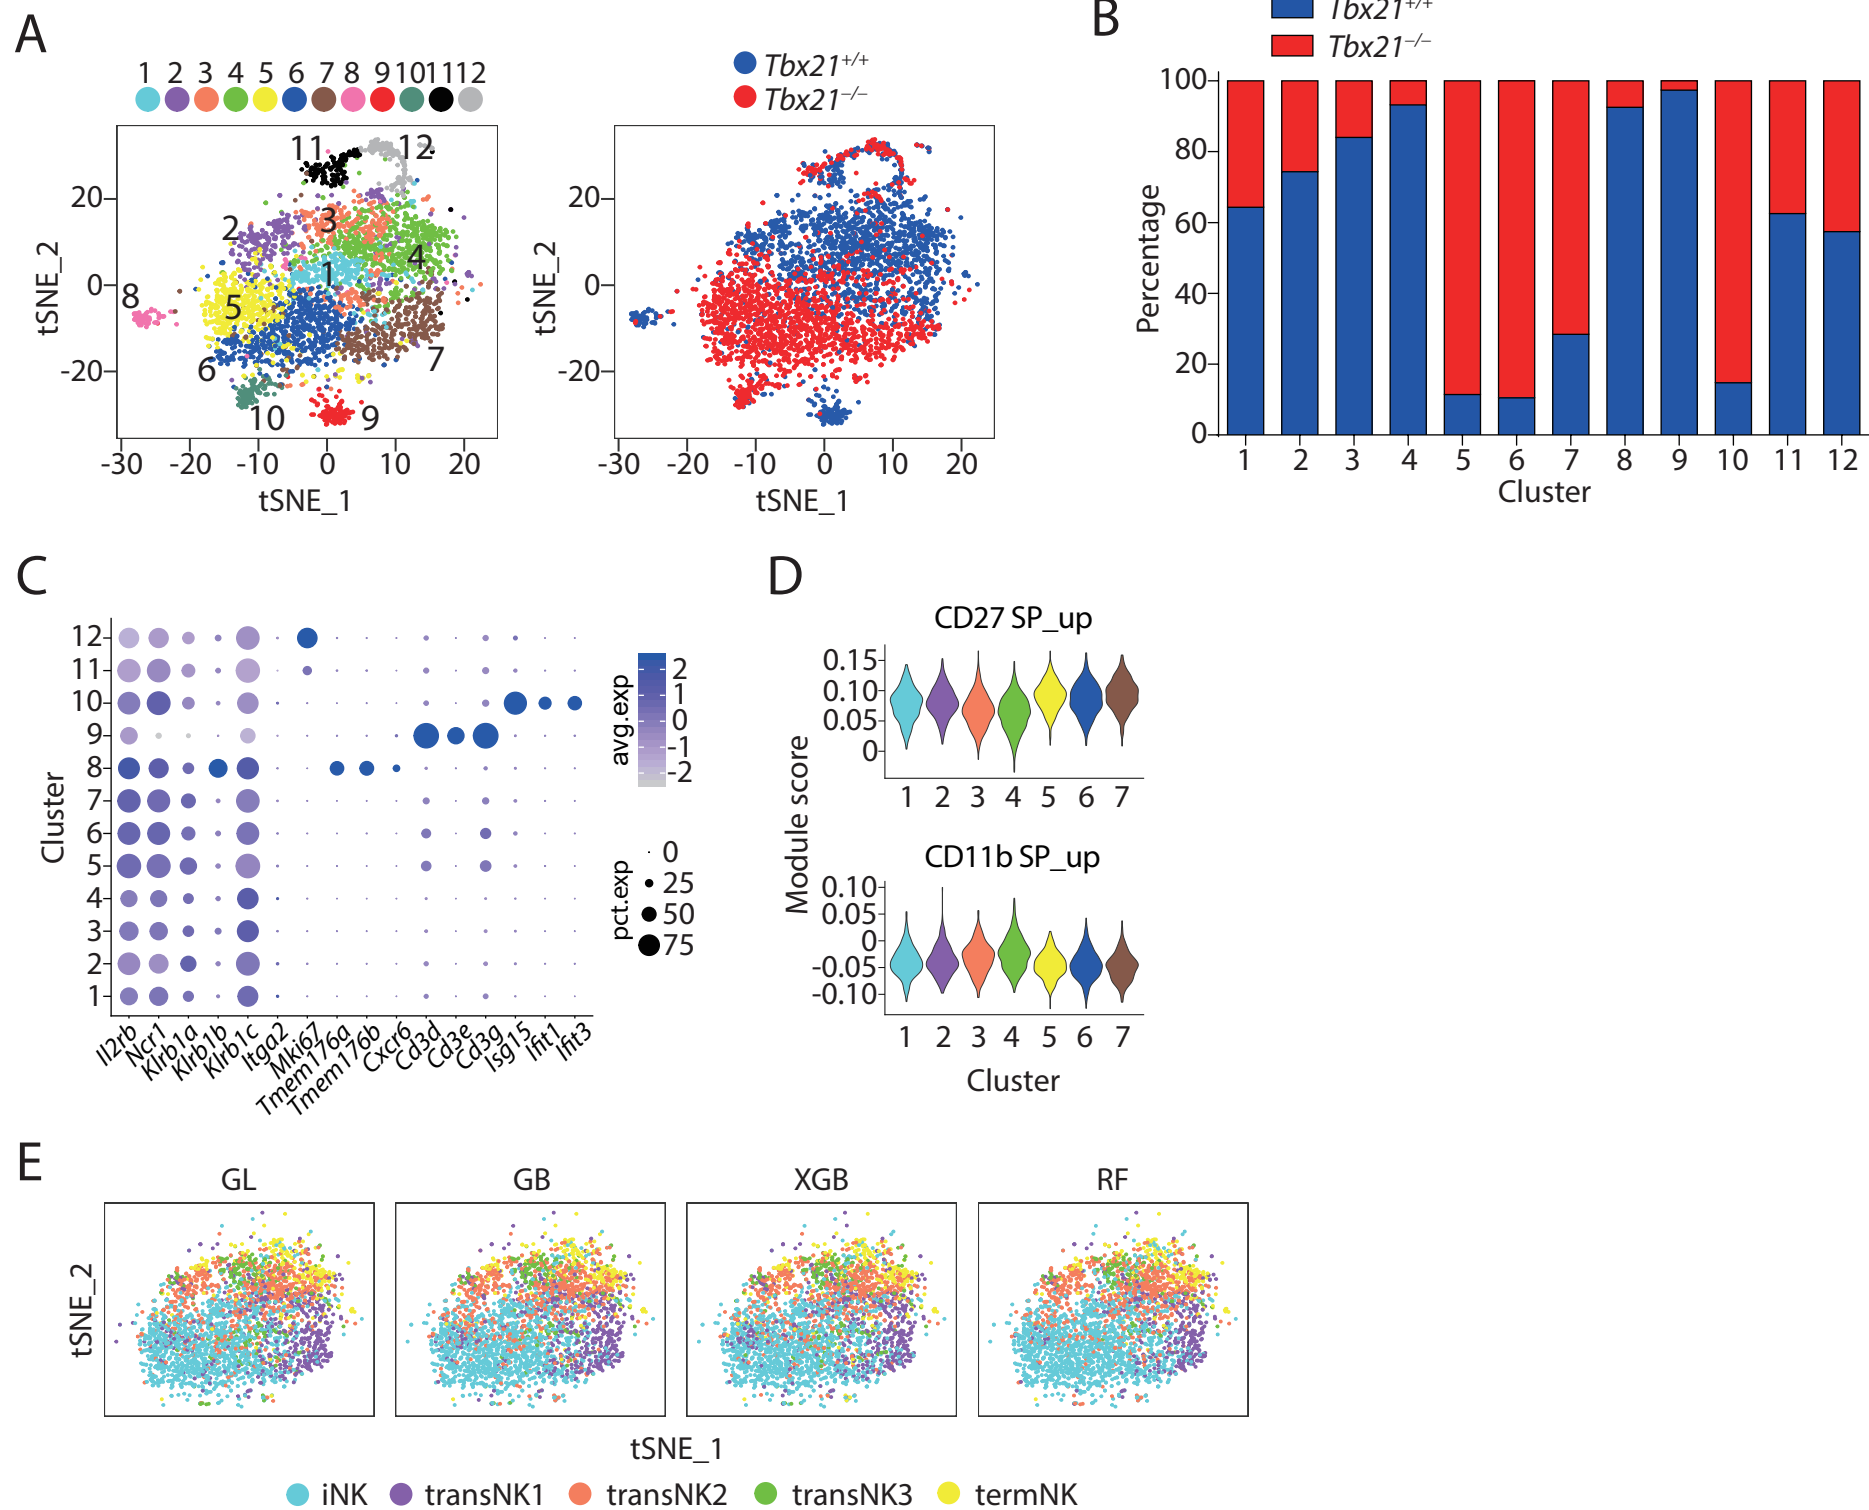

Supplement: supp [file elife-51339-supp-v1.zip › elife_poa_e51339_Figure_5_figure_supplement_1.pdf]

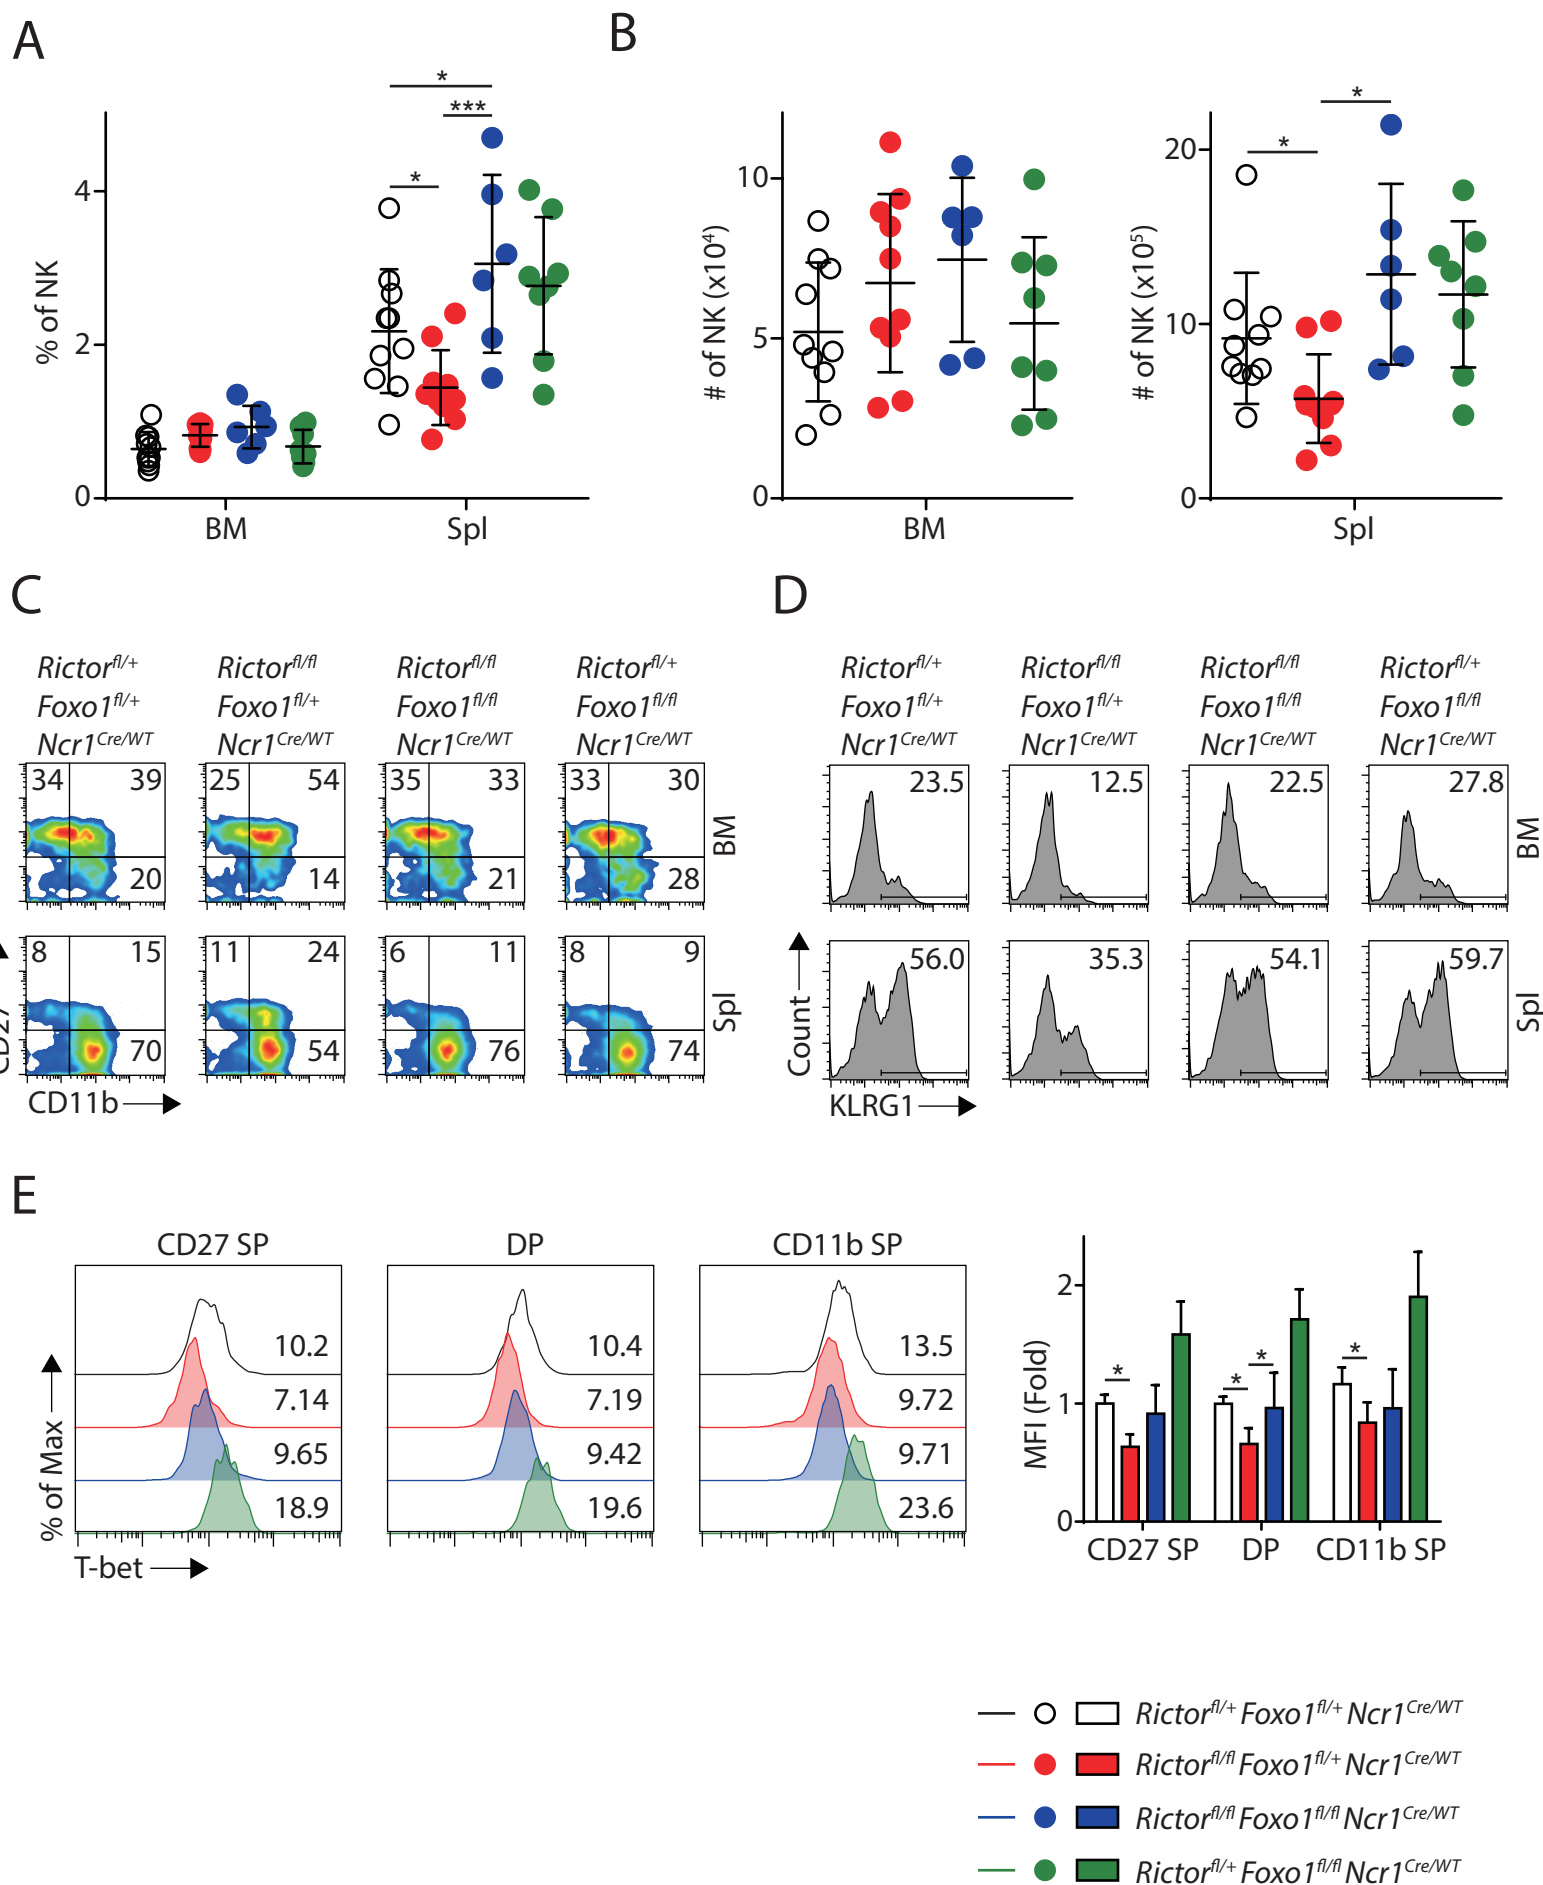

Supplement: supp [file elife-51339-supp-v1.zip › elife_poa_e51339_Figure_7_figure_supplement_1.pdf]
